# 1 **Cdt1 inhibits CMG helicase in early S phase to separate origin licensing from DNA** 2 **synthesis**

3 Nalin Ratnayake<sup>1,2</sup>, Mingyu Chung<sup>1</sup>, Tobias Meyer<sup>1,2,3,\*</sup>

4 <sup>1</sup>Department of Chemical and Systems Biology, Stanford University School of Medicine,  
5 Stanford, CA 94305, USA

6 <sup>2</sup>Department of Cell and Developmental Biology, Weill Cornell Medical College, New York,  
7 NY 10065, USA

8 <sup>3</sup>Lead Contact

9 \*Correspondence: tom4003@med.cornell.edu

## 10 **Abstract**

11 A fundamental concept in eukaryotic DNA replication is the temporal separation of G1 origin  
12 licensing from S phase origin firing. Re-replication and genome instability ensue if licensing  
13 occurs after DNA synthesis has started. In humans and other vertebrates, the E3 ubiquitin ligase  
14 CRL4<sup>Cdt2</sup> starts to degrade the licensing factor Cdt1 after origins fire, raising the question of how  
15 cells prevent re-replication in early S phase. Here, using quantitative microscopy, we show that  
16 Cdt1 inhibits DNA synthesis during an overlap period when cells fire origins while Cdt1 is still  
17 present. Cdt1 inhibits DNA synthesis by suppressing CMG helicase progression at replication  
18 forks through the MCM-binding domain of Cdt1, and DNA synthesis commences once Cdt1 is  
19 degraded. Thus, instead of separating licensing from firing to prevent re-replication in early S  
20 phase, cells separate licensing from DNA synthesis through Cdt1-mediated inhibition of CMG  
21 helicase after firing.

## 22 **Highlights**

- 23 - Cdt1 is present together with fired origins of replication at the start of S phase
- 24 - Cdt1 delays DNA synthesis by inhibiting CMG helicase progression after origins fire
- 25 - Cdt1 inhibits CMG helicase progression through the MCM-binding domain of Cdt1

## 26 Introduction

27 In order to duplicate their genome precisely once, eukaryotic cells divide DNA replication into  
28 two stages, origin licensing and origin firing. During licensing in G1 phase, cells demarcate  
29 future sites of DNA synthesis by loading inactive MCM2-7 helicases onto origins of replication.  
30 At the start of S phase, cells begin origin firing, whereby replication factors are recruited to the  
31 inactive helicases to form the active CMG (CDC45-MCM2-7-GINS) helicase and replication  
32 fork that duplicate DNA (Arias and Walter, 2007; Diffley, 2011; Limas and Cook, 2019).  
33 Critically, it is thought that origin licensing must be strictly separated in time from origin firing  
34 to avoid re-replication, which occurs when synthesized DNA is re-licensed and replicated again  
35 within the same cell cycle (Arias and Walter, 2007; Limas and Cook, 2019; Reusswig and  
36 Pfander, 2019). Avoiding re-replication is crucial for maintaining genome stability, and failure to  
37 do so results in gene amplification, DNA damage, oncogenesis, and cell death (Arias and Walter,  
38 2007; Pozo and Cook, 2016).

39 The G1/S transition is a particularly vulnerable period in the cell cycle when cells must  
40 simultaneously inactivate licensing activity and initiate origin firing. In humans and other  
41 vertebrates, avoidance of re-replication is critically dependent on the repression of the essential  
42 licensing factor Cdt1 from the start of S phase through anaphase (Pozo and Cook, 2016).  
43 Activation of Cdt1 during this period is sufficient to trigger re-replication (Arias and Walter,  
44 2005a; Dorn et al., 2009; Klotz-Noack et al., 2012; Vaziri et al., 2003), indicating that the  
45 presence of active Cdt1 together with synthesized DNA during early S phase could produce re-  
46 replication. Cdt1 is repressed by degradation mediated by cullin-RING E3 ubiquitin ligases  
47 CRL4<sup>Cdt2</sup> and SCF<sup>Skp2</sup> (also known as CRL1<sup>Skp2</sup>), as well as by Geminin binding and  
48 hyperphosphorylation by Cyclin A-CDK1, both of which prevent Cdt1 licensing activity (Pozo  
49 and Cook, 2016; Zhou et al., 2020). Both Geminin and Cyclin A are degraded during G1 by E3  
50 ubiquitin ligase APC/<sup>Cdh1</sup> and only begin to accumulate at the start of S phase (Bastians et al.,  
51 1999; Geley et al., 2001; McGarry and Kirschner, 1998), while SCF<sup>Skp2</sup>-mediated Cdt1  
52 degradation does not start until mid-S phase (Grant et al., 2018; Sakaue-Sawano et al., 2017).  
53 These findings suggest that CRL4<sup>Cdt2</sup> alone is responsible for degrading Cdt1 and preventing re-  
54 replication in early S phase.

55 However, the exclusive role of CRL4<sup>Cdt2</sup> in inactivating Cdt1 at the start of S phase poses a  
56 conundrum; for CRL4<sup>Cdt2</sup> to ubiquitinate and degrade Cdt1 in S phase, Cdt1 must first bind to the  
57 replication fork component PCNA (Havens and Walter, 2009, 2011), and therefore Cdt1  
58 degradation can only start after origins have already fired. This regulation would result in a  
59 predicted overlap period in early S phase when cells fire origins and could still license DNA  
60 before Cdt1 is fully degraded (Arias and Walter, 2007; Havens and Walter, 2011; Reusswig and  
61 Pfander, 2019). Since it is expected that fired origins immediately synthesize DNA, this overlap  
62 period would be susceptible to re-licensing and re-replication.

63 Human cells replicate DNA at thousands of sites simultaneously, each of which provides an  
64 opportunity for re-replication. Human diploid cells contain approximately 6 gigabases of DNA  
65 and typically have an S phase that is 6-10 h long (Cappell et al., 2016; Grant et al., 2018),  
66 corresponding to an average rate of DNA synthesis of 10-15 megabases per minute. Thus, even  
67 during a short overlap of origin licensing with origin firing, tens to hundreds of megabases of  
68 synthesized DNA could be produced. With these considerations in mind, we set out to study the  
69 predicted overlap period between firing and licensing in early S phase to understand how cells  
70 can protect themselves from re-replication.

71 Here, using a single-cell microscopy-based analysis of human cells, we show that there is an  
72 overlap period in early S phase that lasts approximately 30 min, during which Cdt1 is present  
73 together with fired origins in the absence of Geminin and Cyclin A. Strikingly, we show that in  
74 addition to licensing origins in G1, Cdt1 has an unexpected second role of inhibiting CMG  
75 helicase progression at replication forks during this overlap. This inhibition is dependent on the  
76 MCM-binding domain of Cdt1 and is only relieved once Cdt1 is fully degraded or inhibited by  
77 Geminin. By delaying DNA synthesis at fired origins during early S phase, cells reduce the  
78 amount of synthesized DNA produced in the presence of Cdt1 to deter re-replication. Cdt1-  
79 mediated suppression of DNA synthesis fills a critical gap in licensing regulation and allows for  
80 uninterrupted protection against re-replication from the first fired origin at the start of S phase to  
81 anaphase. Conceptually, our study suggests that instead of temporally separating licensing and  
82 firing of origins in early S phase, human cells safeguard genome integrity by using Cdt1-  
83 mediated CMG helicase inhibition to separate licensing and DNA synthesis.

## 84 **Results**

### 85 *Cdt1 is present together with fired origins in early S phase*

86 To determine if and for how long Cdt1 is present together with fired origins of replication  
87 (Figure 1A), we monitored the degradation of a doxycycline (Dox)-inducible Cdt1-mCherry  
88 fusion protein in live MCF-10A cells (a non-transformed human epithelial cell line). To monitor  
89 DNA replication, we co-expressed an EYFP-tagged PCNA that forms foci at sites of origin firing  
90 and DNA synthesis (Hahn et al., 2009; Leonhardt et al., 2000). In line with previous studies  
91 (Grant et al., 2018; Pozo et al., 2018), Cdt1-mCherry degradation at S phase start is coupled to  
92 the formation of PCNA foci (Figure 1B, S1A). Time-lapse analysis shows that it takes  
93 approximately 30 min between the start and completion of Cdt1-mCherry degradation (Figure  
94 S1A), suggesting that there is an extended period in early S phase when Cdt1-mCherry is present  
95 together with fired origins.

96 To determine whether endogenous Cdt1 is degraded over a similar time window in early S phase,  
97 we utilized a combined quantitative image-based cytometry (QIBC) (Toledo et al., 2013) and  
98 live-cell imaging approach (Cappell et al., 2016; Spencer et al., 2013). In this method, we  
99 identified the S phase entry time for each cell using automated live-cell imaging of fluorescent  
100 cell cycle reporters prior to cell fixation, and identified the same cells in QIBC analysis (Cappell  
101 et al., 2016, 2018; Gookin et al., 2017; Stallaert et al., 2021). This method allowed us to  
102 retrospectively synchronize fixed-cell measurements of thousands of cells based on the elapsed  
103 time from S phase start with high temporal resolution (Figure 1C). For simplicity, we refer to this  
104 technique here as Retrospective Time-lapse Synchronized QIBC (RT-QIBC).

105 To precisely measure S phase entry in live cells, we imaged a reporter of CRL4<sup>Cdt2</sup> activity based  
106 on amino acids 1-100 of human Cdt1, which is rapidly degraded at S phase start by CRL4<sup>Cdt2</sup> in  
107 response to origin firing and reaccumulates at the start of G2 (Sakaue-Sawano et al., 2017)  
108 (Figure 1D, S1B). This reporter is not degraded by SCF<sup>Skp2</sup>. We used this reporter in its original  
109 N-terminal mCherry-tagged orientation (referred to here as N-CRL4<sup>Cdt2</sup> reporter), and  
110 additionally created and used a C-terminally tagged reporter (C-CRL4<sup>Cdt2</sup> reporter), which is  
111 degraded with slightly faster kinetics at S phase start for precise measurement of the initial

112 moments of S phase (see Methods for discussion of reporters, Figures S1B and S1C). We define  
113 the start of S phase to be the start of origin firing and loading of PCNA to replication forks,  
114 which triggers CRL4<sup>Cdt2</sup> activation (referred to in the Figures as CRL4<sup>Cdt2</sup> act.) and the  
115 degradation of the CRL4<sup>Cdt2</sup> reporters. In line with this, RT-QIBC analysis indicates that the start  
116 of degradation of the CRL4<sup>Cdt2</sup> reporters coincides with chromatin-bound PCNA  
117 immunofluorescence staining (Figure S1D).

118 We performed RT-QIBC of endogenous Cdt1 immunofluorescence staining and aligned  
119 asynchronously cycling cells to S phase start. Based on this analysis, endogenous Cdt1 takes  
120 approximately 30 min to degrade following the start of origin firing (Figure 1E), similar to the  
121 time measured using overexpressed Cdt1-mCherry.

122 Although Cdt1 is present in early S phase, it could be in an inhibited state either through binding  
123 by Geminin or hyperphosphorylation by Cyclin A-CDK1. The levels of Geminin and Cyclin A  
124 are expected to be low since they are both degraded by APC/C<sup>Cdh1</sup> throughout G1 and should  
125 only begin to accumulate following APC/C<sup>Cdh1</sup> inactivation (Cappell et al., 2016; Geley et al.,  
126 2001; Limas and Cook, 2019; McGarry and Kirschner, 1998). Using RT-QIBC analysis, we  
127 indeed find very low levels of both Geminin (median is 9.2% of G2 levels) and Cyclin A  
128 (median is 1.2% of G2 levels) in the first 30 min of S phase, with both gradually increasing  
129 following S phase entry (Figures 1F, 1G and S1E). This result is consistent with studies that  
130 showed that Geminin and Cyclin A contribute to Cdt1 inhibition later in S and G2 after they  
131 accumulate to high enough levels (Klotz-Noack et al., 2012; Zhou et al., 2020).

132 RT-QIBC analysis was corroborated with live-cell imaging of a reporter of APC/C activity that  
133 shows that APC/C<sup>Cdh1</sup> inactivation (referred to in the Figures as APC/C<sup>Cdh1</sup> inact.), which is  
134 necessary to stabilize Geminin and Cyclin A at the G1/S transition, occurs very near the start of  
135 S phase and can occur after the start of S phase (Figure S1B and S1C), in line with previous  
136 findings (Grant et al., 2018; Sakaue-Sawano et al., 2017). We conclude that early S phase is  
137 characterized by an approximately 30 min-long overlap period, during which replication origins  
138 have fired and Cdt1 is still present and active. This presents a problem in the regulation of origin  
139 licensing, as synthesized DNA at these fired origins would be susceptible to re-licensing by Cdt1  
140 and re-replication.

141 ***DNA synthesis is inhibited in the presence of Cdt1***

142 We next determined how much DNA is synthesized during the overlap period when origins have  
143 fired and Cdt1 is still present. We measured the levels of Cdt1 together with DNA synthesis  
144 rates, measured by the incorporation of the thymidine analog 5-Ethynyl-2'-deoxyuridine (EdU)  
145 into synthesized DNA in an 8 min period just before cell fixation. Strikingly, as cells transition  
146 from G1 to S phase, Cdt1 and EdU staining are mutually exclusive (Figure 2A), arguing that  
147 while origins are firing in the presence of Cdt1, there is no detectable DNA synthesis occurring  
148 during the overlap period.

149 One possible explanation of the lack of EdU incorporation was that Cdt1 itself suppresses DNA  
150 synthesis. To explore this possibility, we examined EdU incorporation by RT-QIBC in mitogen-  
151 released cells expressing the APC/C reporter together with high levels of Dox-inducible Cdt1-  
152 mCherry (Figures S2A-C). Markedly, these cells exhibited a delay in the start of EdU  
153 incorporation following APC/C<sup>Cdh1</sup> inactivation, and this delay closely corresponded to the time  
154 during which Cdt1-mCherry was still being degraded (Figure 2B). In line with this interpretation,  
155 we identified a prominent population of cells with chromatin-bound PCNA but low EdU  
156 incorporation, corresponding to cells that had fired origins but had not yet fully degraded their  
157 Cdt1-mCherry (Figure 2C).

158 Since Cdt1-mCherry was still degraded in S phase, we more directly tested for a suppressive role  
159 of Cdt1 by engineering a non-degradable mutant of Cdt1 (ND-Cdt1) with a removed PCNA  
160 interacting protein (PIP) degron that is required for PCNA binding and CRL4<sup>Cdt2</sup>-mediated  
161 degradation, and a mutated Cy motif that is required for its degradation by SCF<sup>Skp2</sup> (Figure 2D  
162 and S2D) (Havens and Walter, 2009; Pozo et al., 2018; Sakaue-Sawano et al., 2017). Like full-  
163 length Cdt1, we find that ND-Cdt1 suppresses EdU incorporation (Figure 2E). Critically,  
164 inhibition of DNA synthesis did not prevent the firing of origins since CRL4<sup>Cdt2</sup> was still  
165 activated similarly to control cells (Figure S2E). Furthermore, continued expression of ND-Cdt1  
166 persistently inhibited EdU incorporation and prevented progression through S phase as measured  
167 by DNA content (Figures 2F, S2F and S2G). To ensure that ND-Cdt1 did not interfere with  
168 origin licensing, we measured chromatin-bound MCM2 as a measure of origin licensing (Håland  
169 et al., 2015; Matson et al., 2017) and found no change (Figure S2H). The inhibition of DNA

170 replication by ND-Cdt1 was also observed in U2OS and HeLa cells, arguing that this inhibition  
171 is not cell-type specific and occurs in both non-transformed and transformed cells (Figures S2I  
172 and S2J).

173 As an additional control, we confirmed that endogenous Cdt1, not just overexpressed Cdt1, could  
174 inhibit DNA synthesis when it fails to be degraded in S phase. To prevent the degradation of  
175 Cdt1 in S phase, we acutely treated cells with MLN-4924, which blocks the activity of cullin-  
176 RING E3 ubiquitin ligases, including CRL4<sup>Cdt2</sup> and SCF<sup>Skp2</sup> (Figure S3A) (Lin et al., 2010).  
177 These cells had suppressed EdU incorporation following S phase entry (Figure 3A, siCtrl  
178 conditions). Similar to overexpressed Cdt1-mCherry, we found that MLN-4924 produced an  
179 increase in a population of cells with chromatin-bound PCNA and low EdU incorporation  
180 (Figure 3B, siCtrl conditions). Knockdown of Cdt1 partially rescued EdU incorporation, while  
181 knockdown of p21, another protein stabilized by MLN-4924 (Lan et al., 2016), did not,  
182 indicating that the suppression of DNA synthesis was mediated by the stabilized Cdt1 (Figure  
183 S3B). We conclude that both overexpressed and endogenous Cdt1 can suppress DNA synthesis  
184 during S phase. These findings provide a potential explanation of how cells avoid re-replication  
185 during the overlap period when Cdt1 is present together with fired origins in early S phase, as the  
186 amount of synthesized DNA, the substrate of re-replication, at these fired origins would be  
187 reduced until Cdt1 is fully degraded (Figure 3C).

### 188 ***Geminin counteracts the inhibition of DNA synthesis by Cdt1***

189 When we inhibited Cdt1 degradation using MLN-4924, cells still started to increase EdU  
190 incorporation in S phase over time (Figure 3A). While Geminin is initially very low in early S  
191 phase, it gradually accumulates throughout S phase (Figure 1F). We considered whether  
192 Geminin binding to Cdt1 could ultimately abrogate the inhibitory action of Cdt1 on DNA  
193 synthesis as an additional mechanism by which cells could inactivate Cdt1 later in S phase.  
194 Consistent with this hypothesis, knockdown of Geminin suppressed EdU incorporation longer in  
195 cells treated with MLN-4924 (Figures 3A and 3B).

196 To better understand the role of Geminin, we determined how different levels of ND-Cdt1  
197 regulate DNA synthesis in the presence or absence of Geminin. Cell lines with inducible ND-

198 Cdt1 show variable expression between cells, and after computationally stratifying cells by their  
199 ND-Cdt1 expression, we found that EdU incorporation was inhibited in a dose-response manner  
200 taking the form of a Hill curve (Figure 3D). In cells 2-3 h post S phase entry, moderate ND-Cdt1  
201 expression appeared to be buffered by Geminin and minimally inhibited EdU incorporation. In  
202 line with this, ND-Cdt1 suppressed DNA synthesis with a much lower  $IC_{50}$  with Geminin  
203 knocked down (Figure 3D).

204 To explore the relationship of Geminin to Cdt1-mediated inhibition of DNA synthesis further,  
205 we measured the dose-response of EdU to ND-Cdt1 at different Geminin levels, generated by  
206 treating cells with varying concentrations of Geminin siRNA (Figure S3C). We observed that  
207 DNA synthesis is progressively inhibited at lower ND-Cdt1 concentrations as Geminin  
208 decreases, with the  $IC_{50}$  decreasing linearly with Geminin levels (Figures 3E, S3D and S3E).  
209 This manifests as a ratiometric relationship between Cdt1 and Geminin, where double the ND-  
210 Cdt1 levels require double the Geminin levels to be neutralized (Figure 3F), consistent with  
211 Geminin's role in physically binding to and inhibiting Cdt1 (Pozo and Cook, 2016).

212 Together, these analyses argue that Geminin not only inhibits Cdt1 licensing activity but also  
213 prevents Cdt1 from inhibiting DNA synthesis. This regulation allows DNA synthesis to proceed  
214 either after Cdt1 is degraded or after Geminin levels have sufficiently increased to inhibit Cdt1.  
215 Inhibition by Geminin likely becomes relevant in late S phase when Cdt1 is stabilized due to  
216 CRL4<sup>Cdt2</sup> inactivation and Geminin levels are high, but DNA synthesis is still not complete  
217 (Pozo et al., 2018). However, during the overlap period of Cdt1 and fired origins in early S  
218 phase, there would not normally be enough Geminin to fully inhibit Cdt1, necessitating the  
219 suppression of DNA synthesis at fired origins by Cdt1 to deter re-replication.

### 220 ***Cdt1 suppresses DNA synthesis during the overlap period of licensing and firing***

221 If endogenous Cdt1 is indeed inhibiting DNA synthesis during early S phase, prematurely  
222 inactivating Cdt1 in G1 should accelerate the start of DNA synthesis. Since Cdt1 is required for  
223 origin licensing, we could not use long-term Cdt1 knockdown for these experiments. Instead, we  
224 made use of the licensing kinetics in MCF-10A cells, which complete the majority of origin  
225 licensing shortly after anaphase and then further boost licensing during G1 (Figures 4A and



226 S4A). In this way, acutely inactivating Cdt1 during G1 would reduce but not prevent origin  
227 licensing, which cells are known to tolerate (McIntosh and Blow, 2012).

228 Since Geminin suppresses the Cdt1-mediated inhibition of DNA synthesis, we generated a cell  
229 line with Dox-inducible Geminin to prematurely inactivate Cdt1 during G1 (Figure 4B). To  
230 prevent Geminin degradation in G1 by APC/C<sup>Cdh1</sup>, we mutated the Geminin D-box motif  
231 (McGarry and Kirschner, 1998; Shreeram et al., 2002), and the resulting cell line induced  
232 Geminin<sup>ΔDbox</sup> to levels higher than endogenous Geminin in G2 in ~50% of G1 cells (Figure 4C).

233 When we acutely induced Geminin<sup>ΔDbox</sup> in unsynchronized cells during live-cell imaging, we  
234 found that cells that divided shortly after Dox addition, and thus went through early G1 without  
235 Geminin<sup>ΔDbox</sup>, only had a moderate reduction in origin licensing at S phase entry, in line with the  
236 majority of origin licensing occurring shortly after anaphase in these cells (Figure 4D). In  
237 contrast, cells that received Dox well before mitosis and thus expressed Geminin<sup>ΔDbox</sup> by the time  
238 they reached anaphase had completely inhibited origin licensing, indicating that Geminin<sup>ΔDbox</sup>  
239 had fully inhibited Cdt1 in these cells. Therefore, we could examine cells where Geminin<sup>ΔDbox</sup>  
240 was induced only during G1 (post-licensing Geminin<sup>ΔDbox</sup> from Figure 4D) to determine when  
241 DNA synthesis starts if Cdt1 is inactivated before the start of S phase. In the first 30 min of S  
242 phase, cells with Cdt1 neutralized by Geminin<sup>ΔDbox</sup> (Figure 4C, early S phase; Figures S4B and  
243 S4C) exhibited approximately 5 to 10-fold higher EdU incorporation than control cells (Figure  
244 4E). We estimate that this increased EdU incorporation corresponds to approximately 12-18  
245 megabases of DNA synthesized (Figure S4D and S4E). Thus, we conclude that Cdt1 limits the  
246 amount of synthesized DNA in early S phase, providing a protective mechanism against re-  
247 replication during an overlap period where Cdt1 is present together with fired origins.

#### 248 ***Cdt1 inhibits DNA synthesis independently of the intra-S phase checkpoint and re-replication***

249 Next, we sought to determine the mechanism by which Cdt1 inhibits DNA synthesis. The intra-S  
250 phase checkpoint, which limits the rate of DNA synthesis and progression through S phase, can  
251 be activated in response to re-replication and DNA damage caused by Cdt1 dysregulation  
252 (Davidson et al., 2006; Liu et al., 2007; Truong and Wu, 2011; Vaziri et al., 2003). Alternatively,  
253 the addition of high levels of Cdt1 to replicating *Xenopus* egg extracts not only triggers

254 checkpoint activation but also directly inhibits replication fork elongation (Nakazaki et al., 2016,  
255 2017; Tsuyama et al., 2009), suggesting other plausible mechanisms by which Cdt1 could inhibit  
256 DNA synthesis.

257 We first focused on whether the intra-S phase checkpoint mediates the inhibition of DNA  
258 synthesis in early S phase by Cdt1. We overexpressed ND-Cdt1 in cells with Geminin knocked  
259 down to maximize the possibility of producing DNA damage and measured  $\gamma$ H2AX, phospho-  
260 Chk1(S317) and phospho-Chk2(T68), markers of DNA damage and the intra-S phase  
261 checkpoint. Unexpectedly, we did not observe increases in these markers in response to ND-  
262 Cdt1 expression (Figure 5A).

263 As an independent measure of checkpoint activation, we turned to a live-cell reporter of the  
264 activity of Cyclin E/A complexed with CDK2/1 (Cyclin E/A-CDK) (Figure S5A) (Chung et al.,  
265 2019; Spencer et al., 2013). Since Cyclin E/A-CDK activity is partially inhibited by the intra-S  
266 phase checkpoint, it can be used as a proxy for checkpoint activation (Daigh et al., 2018).  
267 Indeed, hydroxyurea reduces Cyclin E/A-CDK activity in S phase, while inhibitors of checkpoint  
268 mediators ATR or Wee1 increase Cyclin E/A-CDK activity (Figure 5B). However, ND-Cdt1  
269 expression does not decrease Cyclin E/A-CDK activity, arguing against intra-S phase checkpoint  
270 activation (Figure 5C). As an additional test, we added ATR or Wee1 inhibitors to cells  
271 overexpressing ND-Cdt1 and found that ND-Cdt1 still suppressed EdU incorporation with the  
272 same  $IC_{50}$  (Figure 5D). Together, these results show that the intra-S phase checkpoint does not  
273 mediate the suppression of DNA synthesis by Cdt1.

274 It has also been suggested that re-replication can inhibit DNA synthesis independently of the  
275 intra-S phase checkpoint (Davidson et al., 2006; Neelsen et al., 2013). If re-replication is  
276 necessary for the suppression of DNA synthesis by Cdt1, blocking licensing activity, which is  
277 necessary for re-licensing and re-replication, should rescue DNA synthesis. To inhibit licensing,  
278 we used a previously developed RPE-1 *p53*<sup>-/-</sup> cell line with mAID and SMASH-tag inducible  
279 degrons knocked-in to both copies of *CDC6* (referred to here as *CDC6*<sup>d/d</sup>), another essential  
280 licensing factor (Figure 5E) (Lemmens et al., 2018). In this cell line, Cdc6 can be rapidly  
281 degraded to very low levels within 4 h (Figures 5F and 5G). Control experiments confirmed that

282 degrading Cdc6 in cells entering the cell cycle from an unlicensed G0 inhibited origin licensing,  
283 resulting in a strong suppression of EdU incorporation (Figure S5B).

284 To determine whether re-licensing is required for Cdt1-mediated inhibition of DNA synthesis,  
285 we introduced Dox-inducible constructs for ND-Cdt1-mCherry and control NLS-mCherry into  
286 the *CDC6<sup>d/d</sup>* cell line. We synchronized cells in late G1 by releasing cells from G0 into a  
287 mimosine arrest, which blocks cells after origin licensing (Kubota et al., 2014). In the final 4 h  
288 before releasing cells from mimosine arrest into S phase, we could degrade Cdc6 to prevent  
289 further licensing during S phase and compare cells that expressed ND-Cdt1 or the control  
290 construct (Figures 5F, S5C and S5D). ND-Cdt1-mCherry inhibited EdU incorporation following  
291 mimosine release, regardless of Cdc6 degradation, arguing that re-licensing and re-replication  
292 are not necessary for Cdt1 to inhibit DNA synthesis (Figure 5G). Furthermore, this cell line does  
293 not have functional p53, which has also been implicated in the DNA damage response to re-  
294 replication (Vaziri et al., 2003). We conclude that re-replication, p53, and intra-S phase  
295 checkpoint activation are not required for the Cdt1-mediated inhibition of DNA synthesis in  
296 early S phase, which argues that Cdt1 directly suppresses DNA synthesis.

### 297 ***Cdt1 inhibits replication fork elongation while permitting origin firing***

298 We next determined whether Cdt1 suppresses DNA synthesis by inhibiting origin firing or by  
299 inhibiting replication fork elongation after origin firing, as has been suggested to occur in  
300 *Xenopus* egg extracts after the addition of excess Cdt1 (Nakazaki et al., 2016; Tsuyama et al.,  
301 2009). To quantify origin firing and recruitment of replication factors to the replication fork in  
302 the presence of ND-Cdt1, we measured chromatin-bound replication factors CDC45,  
303 TIMELESS, DNA polymerases epsilon, alpha and delta (Pol  $\epsilon$ ,  $\alpha$  and  $\delta$ ), and PCNA (Figures 6A  
304 and S6B). Replication factors that are part of or bind to the CMG helicase (CDC45, TIMELESS,  
305 Pol  $\epsilon$  and Pol  $\alpha$ ) did not have impaired chromatin association in the presence of ND-Cdt1, while  
306 Pol  $\delta$ , which synthesizes lagging strands, and PCNA were present but approximately 50%  
307 reduced (Figures 6A, 6B and S6A-C) (Burgers and Kunkel, 2016). These findings are consistent  
308 with our observation that CRL4<sup>Cdt2</sup>, which depends on chromatin-bound PCNA, is still activated  
309 in the presence of ND-Cdt1 (Figure S2E).

310 To determine if the reduced levels of chromatin-bound Pol  $\delta$  and PCNA we observe are  
311 responsible for the inhibition of DNA synthesis, we simultaneously analyzed the chromatin-  
312 bound replication factors together with EdU incorporation. In control conditions, there is a linear  
313 relationship between the level of each of the chromatin-bound proteins (CDC45, TIMELESS,  
314 Pol  $\epsilon$  Pol  $\alpha$ , Pol  $\delta$  and PCNA) and EdU incorporation, indicating that each chromatin-bound  
315 protein signal is normally proportional to the number of active replication forks (Figures 6C and  
316 S6D). However, EdU incorporation is greatly reduced at matching levels of chromatin-bound  
317 protein in the presence of ND-Cdt1, suggesting that the same number of replication forks  
318 synthesize less DNA (Figures 6C and S6E). This is true even for Pol  $\delta$  and PCNA, where EdU  
319 incorporation is much lower than would be expected given a 50% reduction in chromatin-bound  
320 levels. These results are consistent with Cdt1 inhibiting replication fork elongation at fired  
321 origins.

322 Since the lagging strand of the replication fork is bound by PCNA and Pol  $\delta$ , which are  
323 eventually removed after the completion of Okazaki fragments (Burgers and Kunkel, 2016; Lee  
324 et al., 2013), we hypothesized that the reduced amounts of chromatin-bound PCNA and Pol  $\delta$  we  
325 measure in the presence of ND-Cdt1 are a consequence of reduced fork elongation, rather than a  
326 reduced number of replication forks. In line with this, when we used hydroxyurea to block  
327 elongation of replication forks, we found lower chromatin-bound PCNA, which was not further  
328 lowered in cells also expressing ND-Cdt1 (Figure 6D). Such a reduction of PCNA at stalled  
329 forks has previously been reported (Sirbu et al., 2011; Yu et al., 2014). In aggregate, these results  
330 show that Cdt1 does not prevent the process of origin firing and formation of the replication fork,  
331 but rather inhibits replication fork elongation, which results in suppressed DNA synthesis.

### 332 ***Cdt1 inhibits CMG helicase progression through its MCM-binding domains***

333 Replication fork elongation primarily can be suppressed by inhibiting the replicative DNA  
334 polymerases or by inhibiting the progression of the CMG helicase, which is responsible for  
335 unwinding double-stranded DNA. Cdt1 contains a high-affinity interaction with PCNA through  
336 its PIP degron, and it has been suggested that PIP degron-containing proteins can interfere with  
337 the binding of polymerases to PCNA and thereby inhibit DNA synthesis (Mansilla et al., 2020;  
338 Tsanov et al., 2014). However, ND-Cdt1 has its PIP degron removed, arguing against

339 polymerase inhibition. On the other hand, the addition of high levels of Cdt1 to replicating  
340 *Xenopus* egg extracts has been suggested to impair CMG helicase progression (Nakazaki et al.,  
341 2016, 2017). With these results in mind, we considered whether Cdt1 suppresses DNA synthesis  
342 in early S phase by inhibiting polymerases or CMG helicase progression.

343 A distinguishing feature of an inhibitor that blocks polymerases is that it triggers the  
344 accumulation of single-stranded DNA (ssDNA) at the replication fork, as CMG unwinds DNA  
345 that the polymerases are not able to fill (Figure 7A) (Nakazaki et al., 2016; Toledo et al., 2013;  
346 Zeman and Cimprich, 2014). Thus, we examined the chromatin-bound levels of ssDNA-binding  
347 protein RPA together with ND-Cdt1. During an unperturbed S phase, there is an increase in  
348 chromatin-bound RPA compared to basal G1 levels due to the normal production of ssDNA at  
349 replication forks (Figures 7B and S7A). However, cells with ND-Cdt1 have diminished RPA  
350 binding compared to control cells despite having similar, if not larger, amounts of origins fired,  
351 as measured by chromatin-bound CDC45. ND-Cdt1 also negates the increase in chromatin-  
352 bound RPA in response to hydroxyurea and ATR inhibitor co-treatment, which is known to  
353 generate a large increase in chromatin-bound RPA due to polymerase inhibition (Figures 7B and  
354 S7A) (Toledo et al., 2013). These results suggest that the CMG helicase unwinds less DNA in  
355 the presence of Cdt1. These findings are supported by a study in *Xenopus* egg extracts, where the  
356 addition of Cdt1 reduced the amount of chromatin-bound RPA (Nakazaki et al., 2016). We  
357 conclude that Cdt1 inhibits CMG helicase progression rather than polymerase activity in early S  
358 phase.

359 As part of its role in origin licensing, Cdt1 directly binds to soluble MCM helicases through two  
360 MCM-binding regions, which results in a conformational change in the MCM helicases that  
361 allows them to be loaded onto origins (Frigola et al., 2017; Pozo and Cook, 2016). In *Xenopus*  
362 egg extracts, truncations in Cdt1 that overlapped with these regions interfered with the inhibition  
363 of DNA synthesis by Cdt1 (Nakazaki et al., 2017). We hypothesized that the same Cdt1-MCM  
364 binding interaction that occurs during licensing might also occur at the activated CMG complex,  
365 of which the MCM helicase is a component, and inhibit its progression. To test this hypothesis,  
366 we first examined the chromatin-binding of ND-Cdt1 using confocal microscopy. Strikingly,  
367 ND-Cdt1 colocalizes with replication foci (marked by chromatin-bound PCNA) during both  
368 early and late S phase (Figure 7C). Since ND-Cdt1 cannot bind PCNA due to its lack of PIP

369 degran, we do not attribute the co-localization to direct binding to PCNA, but rather attribute it  
370 to CMG, which is expected to overlap with PCNA at the resolution limit of light microscopy.

371 We then tested whether the MCM-binding regions of Cdt1 are necessary for Cdt1 to inhibit DNA  
372 synthesis in human cells. The first MCM binding region is found at its C-terminus, while a  
373 second MCM interaction interface was identified near R210 of human Cdt1 (Pozo and Cook,  
374 2016; Pozo et al., 2018). We overexpressed ND-Cdt1 with either a truncation at residue 498 in  
375 the C-terminal MCM-binding domain (ND-Cdt1<sup>Δ499-546</sup>), which abolishes licensing and MCM-  
376 binding (Teer and Dutta, 2008), or the point mutations R198A/R210A in the other interface (ND-  
377 Cdt1<sup>R198A/R210A</sup>), which severely diminishes licensing activity (Marco et al., 2009). We examined  
378 their inhibitory effect on DNA synthesis with Geminin knocked down to exclude differential  
379 Geminin regulation of the mutants and found that ND-Cdt1<sup>Δ499-546</sup> cannot suppress EdU  
380 incorporation at all, while ND-Cdt1<sup>R198A/R210A</sup> still inhibited EdU incorporation, albeit with an  
381 IC<sub>50</sub> approximately double that of normal ND-Cdt1 (Figure 7D). Our observation that Geminin,  
382 which prevents the binding of Cdt1 to MCM helicases (Pozo and Cook, 2016), also prevented  
383 Cdt1-mediated inhibition of DNA synthesis (Figure 3D) is consistent with this mutant analysis.  
384 Together, these experiments indicate that Cdt1 inhibits CMG helicase progression through the  
385 same MCM binding regions it uses for licensing.

## 386 **Discussion**

387 Our study focused on the fundamental problem in eukaryotic DNA replication of duplicating the  
388 genome precisely once every cell cycle. It is generally thought that the solution to this problem is  
389 the strict temporal separation of origin licensing from origin firing to prevent re-replication.  
390 Vertebrate licensing regulation is centered around the inhibition of licensing factor Cdt1 from S  
391 phase entry to anaphase, through its inhibition by Geminin and Cyclin A and degradation by  
392 CRL4<sup>Cdt2</sup> and SCF<sup>Skp2</sup> (Pozo and Cook, 2016). However, only CRL4<sup>Cdt2</sup> appears to act in early S  
393 phase, and given the dependence of CRL4<sup>Cdt2</sup> activity on PCNA bound to replication forks, it has  
394 been noted this mechanism cannot fully separate licensing and firing in early S phase (Arias and  
395 Walter, 2007; Havens and Walter, 2011; Reusswig and Pfander, 2019). Considering the large  
396 number of replication origins, even a short overlap of Cdt1 and fired origins while Cdt1 is being

397 degraded could allow for the re-licensing of DNA, leaving an open question of how cells might  
398 prevent re-replication during this vulnerable period.

399 In this work, we identified an overlap period of Cdt1 with fired origins in early S phase lasting  
400 approximately 30 min in human cells, during which Geminin and Cyclin A are still very low.  
401 Strikingly, we find that Cdt1 inhibits DNA synthesis during this overlap period, and this  
402 inhibition is only relieved once Cdt1 is fully degraded or Cdt1 becomes inhibited by increased  
403 expression of Geminin. Cdt1 suppresses CMG helicase progression, and thus replication fork  
404 elongation, at fired origins through its MCM-binding domains. By delaying replication fork  
405 elongation after origin firing, Cdt1 allows its own degradation by CRL4<sup>Cdt2</sup> to initiate in response  
406 to origin firing while simultaneously reducing the production of synthesized DNA, which is the  
407 substrate of re-replication. Importantly, this mechanism is robust towards changes in Cdt1  
408 expression levels, as cells with higher amounts of Cdt1 that take longer to degrade would  
409 suppress DNA synthesis longer. This protective mechanism could be particularly relevant in  
410 embryonic stem cells and cancer cells, which can have elevated Cdt1 levels (Matson et al., 2017;  
411 Truong and Wu, 2011).

412 Previous studies have identified responses to re-replication and DNA damage in human cells that  
413 reduce DNA synthesis in response to aberrant Cdt1 regulation (Truong and Wu, 2011).  
414 Critically, such mechanisms require re-replication to be produced before their activation and  
415 only minimize further damage, while CMG inhibition by Cdt1 can act before re-replication is  
416 produced. Cdt1 overexpression in human cells has been observed to impair S phase progression  
417 (Dorn et al., 2009; Takeda et al., 2005; Teer and Dutta, 2008), and we propose that Cdt1-  
418 mediated suppression of CMG progression can account for these observations in parallel with  
419 other mechanisms such as intra-S phase checkpoint activation. The finding that Cdt1 inhibits  
420 DNA synthesis raises the question of why dysregulation of Cdt1 has been previously shown to  
421 produce re-replication and DNA damage at all (Arias and Walter, 2005b, 2005a; Dorn et al.,  
422 2009; Klotz-Noack et al., 2012; Vaziri et al., 2003). A likely explanation is that the  
423 approximately 20-fold maximal inhibition of DNA synthesis by Cdt1 could still allow for  
424 enough residual DNA synthesis to produce re-replication over long periods. Furthermore, since  
425 overexpressed or dysregulated Cdt1 might be incompletely degraded, Cdt1 could be reduced to  
426 levels too low for effective suppression of DNA synthesis, but high enough for some re-licensing

427 to occur over time. In support of this, non-degradable mutants of Cdt1 paradoxically produce less  
428 re-replication than wild-type Cdt1 (Takeda et al., 2005; Teer and Dutta, 2008).

429 Overall, a combined single-cell analysis of live- and fixed-cell microscopy enabled us to observe  
430 the dynamics of licensing regulation and DNA synthesis within the transition period in early S  
431 phase. Our study suggests a revision of the concept that origin licensing must strictly be  
432 separated from origin firing to avoid re-replication, and argues that human cells instead separate  
433 origin licensing from DNA synthesis in early S phase. Importantly, we identify that this  
434 separation is enforced by Cdt1 inhibiting the CMG helicase after origin firing. Previously  
435 identified re-replication prevention mechanisms center around the inhibition of licensing factors  
436 as cells enter S phase (Arias and Walter, 2007). In contrast, we identified a new class of licensing  
437 regulation whereby a licensing factor itself inhibits S phase progression. We propose that both  
438 classes of regulation are needed to safeguard genome integrity in early S phase.

#### 439 ***Acknowledgments***

440 We thank Arne Lindqvist for providing RPE-1  $p53^{-/-}$   $CDC6^{d/d}$  cells; Hana Sedlackova and Jiri  
441 Lukas for providing U2OS  $CDC45$ -GFP cells; Yilin Fan, Lindsey Pack, Anjali Bisaria, Damien  
442 Garbett, Steven Cappell, and Arnold Hayer for technical support; Meredith Weglarz and the  
443 Stanford Shared FACS Facility for cell sorting; Lindsey Pack, Yilin Fan, and Katherine Ferrick  
444 for critical reading of the manuscript; Karlene Cimprich, James Ferrell, Gheorghe Chistol,  
445 Daniel Jarosz and all members of the Meyer laboratory for helpful discussions. This work was  
446 funded by a National Institute of General Medical Sciences (NIGMS) R35 grant  
447 (5R35GM127026-05). N. R. was supported by an NSF Graduate Research Fellowship (DGE-  
448 1147470).

#### 449 ***Author Contributions***

450 Conceptualization, N.R., M.C., and T.M; Methodology, N.R., M.C., and T.M; Software, N.R.;  
451 Formal Analysis, N.R.; Investigation, N.R., and M.C.; Data Curation, N.R.; Writing – Original  
452 Draft, N.R., and T.M.; Writing – Review & Editing, N.R., M.C., and T.M; Visualization, N.R.;  
453 Supervision, T.M; Funding Acquisition, T.M.

#### 454 ***Declaration of Interests***

455 The authors declare no competing interests.



456 ***STAR Methods***

457 ***Resource availability***

458 **Lead contact**

459 Further information and requests for resources and reagents should be directed to and will be  
460 fulfilled by the lead contact, Tobias Meyer ([tom4003@med.cornell.edu](mailto:tom4003@med.cornell.edu))

461 **Materials availability**

462 Plasmids and cell lines generated in this study are available upon request to lead contact.

463 **Data and code availability**

464 Custom MATLAB image-processing pipeline and scripts used to generate the figures from this  
465 study have been deposited at Github and Zenodo ([https://github.com/MeyerLab/image-analysis-](https://github.com/MeyerLab/image-analysis-ratnayeke-2021)  
466 [ratnayeke-2021](https://doi.org/10.5281/zenodo.5037903), <https://doi.org/10.5281/zenodo.5037903>). Data from processed images to use  
467 with the code repository are available at Dryad (<https://doi.org/10.5061/dryad.4xgxd2599>). Raw  
468 imaging data acquired during this study have not been deposited in a public repository due to  
469 storage limitations but are available from the lead contact upon request.

470 ***Experimental model and subject details***

471 **Cell culture**

472 All experiments were performed with MCF-10A human mammary epithelial cells (ATCC Cat#  
473 CRL-10317, RRID:CVCL\_0598) unless otherwise noted. MCF-10A cells were cultured in  
474 DMEM/F12 growth media with HEPES (Gibco Cat# 11039047), supplemented with 5% horse  
475 serum (Gibco Cat# 16050122), 20 ng/mL EGF (PeproTech Cat# AF-100-15), 0.5 µg/mL  
476 hydrocortisone (Sigma: H0888), 100 ng/mL cholera toxin (Sigma Cat# C8052) and 10 µg/mL  
477 insulin (Sigma Cat# I1882). Cells were passaged using trypsin-EDTA (0.05%, Gibco Cat#  
478 25300054) and trypsin was neutralized in DMEM/F12 supplemented with 20% horse serum.  
479 RPE-1 *p53*<sup>-/-</sup> cells with double-degron endogenous-tagged Cdc6 (RPE-1 *p53*<sup>-/-</sup> *CDC6*<sup>d/d</sup>) were a

480 kind gift from Arne Lindqvist (Lemmens et al., 2018) and cultured in DMEM/F12 with HEPES  
481 supplemented with 10% FBS (Sigma Cat# TMS-013-B). U2OS cells had endogenously GFP-  
482 tagged CDC45 (a kind gift from Jiri Lukas [Sedlackova et al., 2020]) and were cultured in  
483 DMEM growth media (Gibco Cat# 11995065) with 10% FBS. HeLa cells (ATCC Cat#CCL-  
484 20.2, RRID:CVCL\_2260) were cultured in DMEM growth media with 10% FBS. For MCF-10A  
485 serum starvation, cells were cultured in starvation media (growth media without horse serum,  
486 EGF and insulin and supplemented with 0.3% BSA) after two washes of starvation media. For  
487 mitogen-release, starvation media was exchanged with growth media. All cells were cultured at  
488 37°C and 5% CO<sub>2</sub>. For microscopy experiments, 96-well glass-bottomed plates (Cellvis Cat#  
489 P96-1.5H-N) were collagen-coated (Advanced Biomatrix Cat# 5005-B, 60 µg/mL dilution for at  
490 least 2 h) and cells were seeded into wells at least the night before performing experiments.

#### 491 **Cell line generation**

492 Cell cycle reporter cell lines were generated using third-generation lentiviral transduction (Dull  
493 et al., 1998; Stewart et al., 2003). In short, lentivirus was produced in HEK-293T cells co-  
494 transfected with packaging plasmids pMDLg/pRRE (Addgene # 12251, RRID:Addgene\_12251),  
495 pRSV-rev(Addgene # 1225, RRID:Addgene\_12253), and pCMV-VSV-G (Addgene # 8454,  
496 RRID:Addgene\_8454) together with the lentiviral plasmid with Lipofectamine 2000 (Thermo  
497 Cat# 11668019). 72 h after transfection, virus was collected from the supernatant, filtered with a  
498 .22 µm filter (Millipore Cat# SCGP00525) and concentrated using 100 kDa centrifugal filters  
499 (Millipore Cat# UFC910024). Virus was then transduced into cells in growth media. For  
500 constitutively expressed fluorescent constructs, positive fluorescent cells were sorted using a BD  
501 Influx cell sorter (performed in Stanford Shared FACS Facility), while Dox-inducible constructs  
502 (TetOn in pCW backbone with puromycin selection marker) were selected with 1 µg/mL  
503 puromycin until control cells died unless otherwise stated. TetOn cells were grown in the  
504 absence of Dox until the time of experiment unless otherwise stated.

505 All MCF-10A reporter cell lines were generated from a base cell line transduced with CSII-  
506 pEF1a-H2B-mTurquoise as a nuclear tracking marker. Cells with EYFP-PCNA or the APC/C  
507 reporter were generated by transducing cells with pLV-EYFP-PCNA or CSII-pEF1a-mVenus-  
508 hGeminin(1-110) respectively. Cells containing the APC/C reporter together with either N- or C-

509 CRL4<sup>Cdt2</sup> reporter were generated by transducing cells with bicistronic vector  
510 tFucci(CA)2/pCSII-EF (Sakaue-Sawano et al., 2017) or pLV-hCdt1(1-100) $\Delta$ Cy-mCherry-P2A-  
511 mVenus-hGeminin(1-110) respectively. Cells with the Cyclin E/A-CDK reporter together with  
512 N-CRL4<sup>Cdt2</sup> were created by transduction with CSII-pEF1a-hDHB(994-1087)-mVenus and pLV-  
513 mCherry-hCdt1(1-100) $\Delta$ Cy.

514 pCW constructs (TetOn Dox-inducible) expressing HA or mCherry-tagged Cdt1 mutants or  
515 Geminin $\Delta$ D<sup>box</sup> were introduced into these fluorescent reporter cell lines in combinations found in  
516 the Table S1. For cells with the APC/C reporter and TetOn-Cdt1-mCherry, cells were transduced  
517 with CSII-pEF1a-mVenus-hGeminin(1-110), followed by pLV-rtTA3-IRES-Puro, and then  
518 pLV-TetOn-Cdt1-mCherry. Cell lines transduced with Cdt1-mCherry constructs were induced  
519 with 500 ng/mL Dox while serum starved to sort for expressing cells. mCherry positive cells  
520 were sorted, and media was then switched to growth media without Dox. MCF-10A cells  
521 containing a CDK4/6 reporter (not analyzed), Cyclin E/A-CDK reporter and APC/C reporter  
522 used in Figures S3A and S3B were described previously (Yang et al., 2020). RPE-1 *p53*<sup>-/-</sup>  
523 *CDC6*<sup>ddl</sup> cells were transduced with with CSII-pEF1a-H2B-mTurquoise and CSII-pEF1a-  
524 mVenus-hGeminin(1-110), and then pLV-TetOn-ND-Cdt1-mCherry or pLV-TetOn-NLS-  
525 mCherry. U2OS *CDC45-GFP* cells were transduced with pCW-ND-Cdt1-mCherry-Puro. HeLa  
526 cells were transduced with CSII-pEF1a-H2B-mTurquoise and pLV-mCherry-hGeminin(1-110)-  
527 IRES-Puro.

## 528 **Method Details**

### 529 **Cell cycle reporters**

530 Cell cycle reporters of CRL4<sup>Cdt2</sup> and APC/C activity were used in this study. These reporters  
531 were originally developed as the two components of the FUCCI(CA) reporter system (Sakaue-  
532 Sawano et al., 2017). The CRL4<sup>Cdt2</sup> activity reporter is based on a fragment of human Cdt1  
533 corresponding to the amino acid 1-100, and this fragment is inactive with respect to origin  
534 licensing. The fragment Cdt1(1-100) $\Delta$ Cy contains a PCNA-interacting protein (PIP) degron,  
535 which mediates Cdt1 degradation by CRL4<sup>Cdt2</sup> in response to PCNA at fired origins, and has a  
536 removed Cy motif to prevent degradation by SCF<sup>Skp2</sup> (Sakaue-Sawano et al., 2017). The

537 CRL4<sup>Cdt2</sup> reporter is rapidly degraded to low levels at S phase start and reaccumulates at the start  
538 of G2. Conversely, the APC/C reporter is based on amino acids 1-110 of human Geminin fused  
539 to a fluorescent protein (either mVenus or mCherry), is degraded at anaphase by APC/C<sup>Cdc20</sup> and  
540 then by APC/C<sup>Cdh1</sup> throughout G1, and reaccumulates at the time of APC/C<sup>Cdh1</sup> inactivation at  
541 the G1/S transition. APC/C<sup>Cdh1</sup> inactivation represents a commitment point in the cell cycle and  
542 typically occurs near the time of S phase entry and DNA replication, though CRL4<sup>Cdt2</sup> activation  
543 in response to origin firing is an explicit measure of S phase entry (Grant et al., 2018; Sakaue-  
544 Sawano et al., 2017). While these reporters are typically quantified by their presence or absence  
545 in single-timepoint measurements, when reporter fluorescence kinetics are measured in single  
546 cells using time-lapse microscopy, the precise time of CRL4<sup>Cdt2</sup> activation (the start of  
547 degradation of the CRL4<sup>Cdt2</sup> reporter) and APC/C<sup>Cdh1</sup> inactivation (the stabilization of the APC/C  
548 reporter) can be identified.

549 In this study, we used two versions of the CRL4<sup>Cdt2</sup> reporter, one of which is an N-terminal  
550 mCherry-tagged Cdt1(1-100)<sup>ΔCy</sup> (referred to as the N-CRL4<sup>Cdt2</sup> reporter), which is identical to  
551 the construct used in the FUCCI(CA) reporter system. Since the N-CRL4<sup>Cdt2</sup> reporter is fused to  
552 a fluorescent protein on the N-terminus, the PIP degron is in the middle of the construct. Since  
553 Cdt1 naturally has an N-terminal PIP degron, we hypothesized that reversing the order of the  
554 fluorescent protein fusion in a reporter could confer a faster response to the initial origins that are  
555 fired in early S phase. As a result, we created a C-terminally tagged Cdt1(1-100)<sup>ΔCy</sup> (referred to  
556 as the C-CRL4<sup>Cdt2</sup> reporter). We found that C-CRL4<sup>Cdt2</sup> responds with slightly faster kinetics at S  
557 phase start than N-CRL4<sup>Cdt2</sup>, which was necessary for looking within the first 15-30 min of S  
558 phase by RT-QIBC in Figures 1 and 4. However, both reporters are well suited for RT-QIBC  
559 looking at times after the first 15-30 min of S phase, and we use both reporters in this study. C-  
560 CRL4<sup>Cdt2</sup> has a similar orientation to the PIP-FUCCI cell cycle reporter (Grant et al., 2018),  
561 which is based on Cdt1(1-17) and is also degraded throughout S phase. We consider the N-  
562 CRL4<sup>Cdt2</sup> (originally used in the FUCCI(CA)) system, C-CRL4<sup>Cdt2</sup> and PIP-FUCCI reporters to  
563 all be reporters of CRL4<sup>Cdt2</sup> activity, and should all be suitable for use with RT-QIBC.

564 The cyclin E/A-CDK reporter is a translocation-based reporter which is phosphorylated by cyclin  
565 E or A complexed with CDK2 or CDK1 (referred to collectively as cyclin E/A-CDK) (Spencer  
566 et al., 2013). It is based on a fragment of human DNA helicase B (amino acids 994-1087), which

567 is phosphorylated by cyclin E/A-CDK. When unphosphorylated in G0 and early G1, this reporter  
568 is localized in the nucleus, and as cyclin E/A-CDK activity increases throughout the cell cycle,  
569 the reporter becomes progressively localized to the cytoplasm due to increased phosphorylation.  
570 Thus, the cytoplasm to nuclear ratio of intensity is a readout of cyclin E/A-CDK activity.

## 571 **Plasmid generation**

572 Plasmids generated in this study were assembled using Gibson assembly of PCR amplified  
573 inserts and restriction enzyme digested plasmid backbones. Human full-length Cdt1 was  
574 amplified out of MCF-10A cDNA for Cdt1 overexpression, and mutations and tags were  
575 introduced through primers or gene synthesis (IDT). ND-Cdt1 constructs were created through a  
576 truncation of wild-type Cdt1 (aa20-546) which removes the Cdt1 PIP degron. The Cdt1 Cy motif  
577 (aa68-70 of full-length Cdt1) was mutated to alanine ( $\Delta$ Cy) to prevent degradation by SCF<sup>Skp2</sup>.  
578 This sequence was fused at the C-terminus to a flexible linker, SV40 NLS and either an mCherry  
579 or HA tag. The Geminin <sup>$\Delta$ Dbox</sup> (human Geminin with R23A and L26A mutations) sequence was  
580 generated using gene synthesis and HA-tagged. For Dox-inducible TetOn constructs, PCR  
581 products were inserted into pCW backbone (derived from pCW-Cas9, a gift from Eric Lander &  
582 David Sabatini, Addgene plasmid # 50661, RRID:Addgene\_50661), a bicistronic vector with a  
583 TetOn promoter driving gene expression in addition to a constitutive PGK promoter driven  
584 PuroR-T2A-rtTA. pC1-ND-Cdt1-mCitrine was created by cloning ND-Cdt1 into the pC1  
585 backbone, derived from C1-F-tractin-mCitrine, (Bisaria et al., 2020). pLV-hCdt1(1-100) $\Delta$ Cy-  
586 mCherry-P2A-mVenus-hGeminin(1-110) was generated from full-length Cdt1 and Geminin  
587 (Human ORFeome V5.1). N-CRL4<sup>Cdt2</sup> reporter was amplified from tFucci(CA)2/pCSII-EF, and  
588 inserted into the pLV backbone to generate pLV-mCherry-hCdt1(1-100) $\Delta$ Cy. pLV, CSII and  
589 pCW are lentiviral expression plasmids, while pC1 is a mammalian expression plasmid.

## 590 **siRNA and plasmid transfection**

591 MCF-10A cells were transfected with siRNA using DharmaFECT 1 (Dharmacon Cat# T-2001-  
592 03) according to the manufacturer's protocol using 20 nM siRNA and 1:500 diluted  
593 DharmaFECT 1 final concentration unless otherwise stated. Cells were incubated in transfection  
594 mixture for at 6-24 h in either growth or serum starvation media, followed by a media change.

595 Pools of 3-4 siRNA oligos (ON-TARGETplus, Dharmacon) were used for siCtrl, siCdt1 and  
596 siGeminin. For siCdt1 and siGeminin, oligos that do not target hCdt1(1-100) and hGeminin(1-  
597 110) were selected to avoid knockdown of the CRL4<sup>Cdt2</sup> and APC/C reporters, respectively. A  
598 list of siRNA oligos is in Table S1. HeLa cells were transiently transfected with pC1-ND-Cdt1-  
599 mCitrine plasmid using Lipofectamine 2000 according to the manufacturer's protocol using 2  
600 ng/ $\mu$ L final concentration of plasmid complexed with 1:400 diluted Lipofectamine 2000 final  
601 concentration. Media was exchanged with growth media after 2 h, and cells were then  
602 immediately live-imaged. siRNA and plasmids were both complexed in Opti-MEM serum-free  
603 media (Gibco Cat# 31985070).

## 604 **Drugs**

605 Stock solutions of drugs were dissolved in DMSO (Sigma-Aldrich Cat# D2650) and used at the  
606 given working concentration unless otherwise stated: 2 mM hydroxyurea (HU, dissolved in  
607 water, Cayman Chemical Cat# 23725), 2  $\mu$ M AZ-20 (ATRI, Cayman Chemical Cat# 17589), 1  
608  $\mu$ M MK-1775 (Wee1i, Cayman Chemical Cat# 21266), 1  $\mu$ g/mL Doxycycline hyclate (Sigma-  
609 Aldrich Cat# D9891), 2  $\mu$ M MLN-4924 (Abcam Cat# ab216470), 500  $\mu$ M indole-3 acetic acid  
610 (auxin, MP Biomedicals Cat# 0210203705), 100 nM BMS-650032 (Adooq Bioscience Cat#  
611 A112955), 500  $\mu$ M L-mimosine (20x stock solution dissolved in DMEM/F12, Cayman Chemical  
612 Cat# 14337). For release from mimosine arrest, cells were washed three times in growth media.  
613 For all experiments where drugs or Doxycycline were added to cells, DMSO (vehicle) was added  
614 to control cells, with the exception of HU, which was dissolved in water.

## 615 **Western blot**

616 Cells were grown in 6-well plates. At the time of lysis, cells were washed in ice-cold PBS, lysed  
617 in 2x Laemmli sample buffer with 100 mM DTT and a cell scraper, passed through a 25G needle  
618 10 times, and heated at 90°C for 5 min. Samples were then separated with SDS-PAGE using  
619 7.5% Mini-PROTEAN TGX gels (Bio-Rad Cat# 4561025) in Tris/Glycine/SDS running buffer  
620 (Bio-Rad Cat#161-0772), followed by semi-dry transfer (Bio-Rad Trans-Blot SD, Cat# 1703940)  
621 onto 0.45  $\mu$ m PVDF membranes (Millipore Cat# IPFL00010) with Tris/Glycine buffer (Bio-Rad  
622 Cat# 1610734) + 10% MeOH. Membranes were washed in TBST (20 mM Tris, pH 7.5, 150 mM

623 NaCl, 0.1% Tween 20), blocked for 30 min in 5% milk in TBST, and incubated overnight with  
624 mouse anti-CDC6 antibody (1:500, Santa Cruz Biotech. Cat# sc-9964, RRID:AB\_627236) or  
625 rabbit anti-GAPDH (1:1000, CST Cat# 5174, RRID:AB\_10622025) in 5% BSA + 0.01% NaN<sub>3</sub>  
626 in TBST. Membranes were then incubated in HRP secondary antibodies (1:5000, CST Cat#  
627 7074, RRID:AB\_2099233 or CST Cat# 7076, RRID:AB\_330924) for 30 min, treated with  
628 chemiluminescent substrate (Thermo Cat # 34580) and detected on film (Thomas Sci. Cat# EK-  
629 5130).

## 630 **Fixed-cell sample preparation**

### 631 *General Protocol*

632 Staining and imaging were performed in 96-well glass-bottomed plates (Cellvis Cat# P96-1.5H-  
633 N). Cells were fixed in 4% paraformaldehyde in PBS (diluted from Fisher Cat# NC1537886) for  
634 10 min at room temperature followed by PBS wash. If cells expressed fluorescent proteins which  
635 spectrally overlapped with the fluorophores used in later steps, the fluorescent proteins were  
636 chemically bleached (Lin et al., 2015) in 3% H<sub>2</sub>O<sub>2</sub> + 20 nM HCl in PBS for 1 h, washed in PBS,  
637 and checked under a microscope to ensure there was negligible residual signal. If fluorescent  
638 proteins needed to be quantified in fixed cells prior to immunofluorescence, cells were initially  
639 imaged before bleaching and reimaged after staining. For PCNA and CDC45 staining, cells were  
640 incubated in ice-cold methanol for 15 min after fixation and then washed in PBS. Cells were  
641 permeabilized in 0.2% Triton X-100 in PBS for 10 min and then blocked in blocking buffer A  
642 (10% FBS, 1% BSA, 0.1% Triton X-100, 0.01% NaN<sub>3</sub> in PBS) for 1 h. Cells were then  
643 incubated with primary antibodies overnight in blocking buffer A at 4°C, washed in PBS, and  
644 then incubated with secondary antibodies in blocking buffer A for 1 h at RT. Cells were washed  
645 with PBS and then incubated in 1 µg/mL Hoechst 33342 (Invitrogen Cat# H3570) in PBS for 10  
646 min, followed by a final PBS wash prior to imaging. Unless otherwise stated, all washes were  
647 done with an automated plate washer (aspirate to 50 µL, dispense 250 µL, repeated 9 times,  
648 BioTek 405 LS), or by hand (for pre-extracted samples, 3 washes aspirating all liquid).

### 649 *Iterative immunofluorescence*

650 If simultaneously staining for targets with antibodies of the same species, the iterative indirect  
651 immunofluorescence imaging (4i) technique was used to sequentially image multiple antibodies  
652 (Gut et al., 2018). In short, the first round of imaging was identical to the general  
653 immunofluorescence protocol, with the exception that cells after the post-Hoechst PBS wash  
654 were washed in ddH<sub>2</sub>O and then placed in imaging buffer (700 mM N-acetyl cysteine in ddH<sub>2</sub>O,  
655 pH 7.4, Sigma-Aldrich A7250). Cells were imaged and then washed in ddH<sub>2</sub>O. The prior-round  
656 antibodies were eluted by 3×10-min incubations in elution buffer, which consists of 0.5M  
657 glycine (Sigma-Aldrich), 3M urea (Sigma-Aldrich), 3M guanidinium chloride (Sigma-Aldrich)  
658 and 70 mM TCEP-HCl (Goldbio Cat#TCEP50) in ddH<sub>2</sub>O, pH 2.5, followed by a PBS wash.  
659 Cells were then checked under a fluorescence microscope to ensure proper elution. Cells were  
660 then blocked with blocking buffer B, consisting of 1% BSA in PBS supplemented with 150 mM  
661 maleimide (dissolved just prior to use, Sigma-Aldrich Cat# 129585) for 1 h and then washed in  
662 PBS. Cells were then blocked with blocking buffer A for 30 min, followed by primary antibody  
663 incubation, and the subsequent steps the same as in the first round, repeated as needed. Control  
664 wells leaving out primary antibodies were always included to ensure there was no residual signal  
665 from prior rounds of imaging.

#### 666 *Pre-extraction for chromatin-bound protein*

667 If chromatin-bound proteins were being stained for, soluble proteins were extracted from cells.  
668 Just prior to fixation, media was aspirated off of cells, and the plate was placed on ice. Cells  
669 were incubated in ice-cold pre-extraction buffer, consisting of 0.2% Triton X-100 (Sigma-  
670 Aldrich Cat# X100) + 1x Halt Protease Inhibitor Cocktail (Thermo Cat# 78439) in selected  
671 aqueous buffer. For all proteins pre-extracted for except RPA1, pre-extraction buffer was made  
672 with PBS, while CSK buffer was used for RPA1, consisting of 10 mM PIPES (Sigma-Aldrich),  
673 100 mM NaCl (Sigma-Aldrich), 300 mM sucrose (Sigma-Aldrich), 3 mM MgCl<sub>2</sub> (Sigma-  
674 Aldrich) at pH 7.0. After a set extraction time, 8% PFA in H<sub>2</sub>O was directly added to wells 1:1  
675 with wide-orifice tips to minimize cell detachment, and cells were fixed for 25 min at room  
676 temperature, after which the sample was treated with the general staining protocol. Extraction  
677 times were: 4-5 min (PCNA, MCM2, TIMELESS), 3 min (POLA2, POLD2, POLE2), and 2 min  
678 (ND-Cdt1 and MCM2 in MCF-10A SoRa imaging and MCM2 in RPE-1).



679 *EdU incorporation and labeling*

680 If measuring 5-ethynyl-2'-deoxyuridine (EdU) incorporation, cells were pulsed with 50  $\mu$ M EdU  
681 (Cayman Chemical Cat# 20518) in growth media for 8 min prior to fixation and pre-extraction,  
682 unless otherwise stated. After blocking cells (prior to primary antibodies), cells were washed  
683 once with PBS and then a click reaction (Salic and Mitchison, 2008) was performed in 2 mM  
684  $\text{CuSO}_4$ , 20 mg/mL sodium ascorbate in TBS (Tris 50 mM, NaCl 150 mM pH 8.3) with 3  $\mu$ M  
685 AFDye 488 picolyl azide (Click Chemistry Tools Cat# 1276) or AFDye 647 picolyl azide (Click  
686 Chemistry Tools Cat# 1300) for 30 min, followed by a PBS wash.

687 *Antibodies*

688 The following primary antibodies were used for immunofluorescence: rabbit anti-Cdt1 (1:500,  
689 Abcam Cat# ab202067, RRID:AB\_2651122), rabbit anti-Geminin (1:800, Atlas Antibodies Cat#  
690 HPA049977, RRID:AB\_2680978), mouse anti-Cyclin A (1:250, Santa Cruz Biotech Cat# sc-  
691 271682, RRID:AB\_10709300), mouse anti-PCNA (1:200, Santa Cruz Biotech. Cat# sc-56 ,  
692 RRID:AB\_628110), rabbit anti-MCM2 (1:800, CST Cat# 3619, RRID:AB\_2142137), rabbit  
693 anti-p21 (1:2500, CST Cat# 2947, RRID:AB\_823586), rabbit anti-HA tag (1:1000, CST Cat#  
694 3724, RRID:AB\_1549585), rabbit anti-CDC45 (1:100, CST Cat# 11881, RRID:AB\_2715569),  
695 rabbit anti-POLA2 (1:100, Atlas Antibodies Cat# HPA037570, RRID:AB\_10672280), rabbit  
696 anti-POLD2 (1:100, Atlas Antibodies Cat# HPA026745, RRID:AB\_1855520), rabbit anti-  
697 POLE2 (1:100, Atlas Antibodies Cat# HPA027555, RRID:AB\_10610282), rabbit anti-Timeless  
698 (1:800, Abcam Cat# ab109512, RRID:AB\_10863023), rabbit anti-phospho-Chk1(S317) (1:500,  
699 CST Cat# 12302, RRID:AB\_2783865), rabbit anti-phospho-Chk2(T68) (1:200, CST Cat# 2661,  
700 RRID:AB\_331479), rabbit anti-phospho-histone H2A.X(S139) (1:500, CST Cat# 2577,  
701 RRID:AB\_2118010), rabbit anti-RPA70/RPA1 (1:200, Abcam Cat# ab79398,  
702 RRID:AB\_1603759). The epitopes for anti-Cdt1 and anti-Geminin antibodies do not detect  
703 hCdt1(1-100) <sup>$\Delta$ Cy</sup> and hGeminin(1-110) of the CRL4<sup>Cdt2</sup> and APC/C<sup>Cdh1</sup> reporters. For secondary  
704 antibodies, antibodies targeting the appropriate species and with no spectral overlap were  
705 selected from the following and diluted 1:1000: goat anti-rabbit IgG Alexa Fluor 647 (Thermo  
706 Cat# A-21245, RRID:AB\_2535813), goat anti-rabbit IgG Alexa Fluor 514 (Thermo Cat#  
707 A31558, RRID:AB\_10375589), goat anti-mouse IgG Alexa Fluor 647 (Thermo Cat# A-21235,

708 RRID:AB\_2535804), goat anti-mouse IgG Alexa Fluor 514 (Thermo Cat# A-31555,  
709 RRID:AB\_2536171)

## 710 **Microscopy**

### 711 *Time-lapse imaging, RT-QIBC and QIBC*

712 For automated epifluorescence microscopy, cells were imaged using a Ti2-E inverted  
713 microscope (Nikon) or ImageXpress Micro XLS microscope (Molecular Devices). For imaging  
714 on the Ti2-E, multichannel fluorescent images were taken with triple-band  
715 (ECFP/EYFP/mCherry, Chroma: 89006) or quad-band (DAPI/FITC/TRITC/Cy5, Chroma:  
716 89402) Sedat filter sets using an LED light source (Lumencor Spectra X) and Hamamatsu  
717 ORCA-Flash4.0 V3 sCMOS camera. A 10x (Nikon CFI Plan Apo Lambda, NA 0.45) or 20x  
718 (Nikon CFI Plan Apo Lambda, 0.75 NA) objective was used to acquire images. For imaging on  
719 the ImageXpress, images were taken with appropriate single-band filter sets with a white-light  
720 source, using a 10x (Nikon CFI Plan Fluor, NA 0.3) or 20x (Nikon CFI Plan Apo Lambda, 0.75  
721 NA) and Andor Zyla 4.2 sCMOS camera. All images were acquired in 16-bit mode without  
722 camera-binning, and acquisition settings were chosen to not saturate the signal. Fluorophores and  
723 imaging channels were chosen to minimize bleedthrough, and in the case of detectable  
724 bleedthrough, it was corrected using bleedthrough coefficients estimated from single fluorophore  
725 controls.

726 For live-cell time-lapse imaging, 96-well plates were imaged within an enclosed 37°C, 5% CO<sub>2</sub>  
727 environmental chamber in 200 µL of growth media. 4-9 sites were imaged in each well (with the  
728 number of wells imaged varying depending on experiment and imaging interval) every 3-12 min.  
729 Light exposure to cells was limited by using the minimum exposure necessary to maintain an  
730 acceptable signal-to-noise ratio on a per-channel basis, and total light exposure was always  
731 limited to below 300 ms per site each timepoint. Images were taken with the 10x objective for all  
732 live-cell imaging with the exception of experiments shown in Figure 3A to maximize the number  
733 of cells in the field of view. When performing the live-cell imaging for RT-QIBC, cells were  
734 immediately taken off the microscope following the final time point and fixed.

735 For fixed-cell imaging for RT-QIBC and QIBC, tiled images of the majority of each well (16-36  
736 sites per well) were taken using the 20x objective. When reimaging fixed cells (matching back to  
737 either live-cell imaging for RT-QIBC or previous rounds of fixed-cell imaging), the plate  
738 position (which can shift slightly when replacing the plate on the microscope) was aligned to  
739 approximately the same location, and further aligned computationally during image analysis.

#### 740 *Spinning-disk confocal microscopy*

741 For live-cell imaging of EYFP-PCNA and Cdt1-mCherry (Figures 1B and S1A), cells were  
742 imaged on an automated spinning-disk confocal microscope (Intelligent Imaging Innovations,  
743 3i). This system used a Nikon Ti-E stand, motorized XY stage with piezoelectric Z movement  
744 (3i), Andor Zyla 4.2 sCMOS camera, CSU-W1 confocal scanner unit (Yokogawa) and  
745 405/445/488/514/561/640 nm LaserStack (3i), controlled using SlideBook 6 (3i). Cells were  
746 imaged in a 37°C environmental chamber (growth media was HEPES buffered), using a  
747 60x/1.35NA oil objective (Nikon) with 2x camera binning. Images at the nucleus midplane were  
748 taken every 2-3 min in a 5x5 montage which was stitched together after acquisition. H2B-  
749 mTurquoise, EYFP-PCNA and Cdt1-mCherry were imaged using a triple-band 445/515/561  
750 excitation filter set.

751 For fixed-cell imaging of chromatin-bound ND-Cdt1 localization, pre-extracted MCF-10A cells  
752 were imaged on a SoRa spinning-disk confocal microscope (Marianas system, 3i). This system  
753 was similar to the previously described 3i microscope, except it used a Zeiss Axio Observer 7  
754 stand, ORCA-Fusion BT sCMOS Camera (Hamamatsu), CSU-W1 SoRa confocal scanner unit  
755 (Yokogawa) and 405/445/488/514/561/637 nm LaserStack (3i). Cells were stained using rabbit  
756 anti-HA and anti-rabbit Alexa Fluor 488 (for detecting ND-Cdt1) together with mouse anti-  
757 PCNA and anti-mouse Alexa Fluor 568. Images were taken using the 488 and 561 channels  
758 using a quad-band 405/488/561/640 nm excitation filter set (3i), with a 63x/1.4NA Plan-  
759 Apochromat Oil M27 objective (Zeiss) and 4x magnification changer and no camera binning.  
760 The field of view was manually searched without 4x magnification and low exposure in the 488  
761 channel to identify cells that were positive for ND-Cdt1 expression. Cells were then imaged in  
762 both channels at 5 Z-positions around the midplane of the nucleus (0.75 µm spaced, only the

763 midplane is shown). No deconvolution was performed, and controls were tested to ensure there  
764 was no spectral bleedthrough or cross-binding of secondary antibodies.

## 765 **Protein nomenclature**

766 For simplicity, we refer to several human proteins by their colloquial names. Namely, we refer to  
767 Cdt1 (encoded by *CDT1* gene), Geminin (encoded by *GMNN* gene), Cyclin A (in somatic cells  
768 only Cyclin A2, encoded by *CCNA2* gene, is expressed), CRL4<sup>Cdt2</sup> (Cdt2 is encoded by *DTL*  
769 gene), APC/C<sup>Cdh1</sup> (Cdh1 is encoded by *FZR1* gene), SCF<sup>Skp2</sup> (also known as CRL1<sup>Skp2</sup>, Skp2 is  
770 encoded by *SKP2* gene), Cdc6 (encoded by *CDC6* gene), Chk1 (encoded by *CHEK1* gene),  
771 Chk2 (encoded by *CHEK2* gene), Wee1 (encoded by *WEE1* gene), p21 (encoded by *CDKN1A*  
772 gene), p53 (encoded by *TP53* gene) and Cyclin E (both Cyclin E1 and E2, encoded by *CCNE1*  
773 and *CCNE2* genes). Furthermore, we measure several protein complexes through an individual  
774 subunit (all of which are constitutive complexes): DNA polymerases epsilon (measured by  
775 subunit POLE2), alpha (measured by subunit POLA2) and delta (measured by subunit POLD2),  
776 and RPA (measured by subunit RPA1, also known as RPA70).

## 777 ***Quantification and statistical analysis***

### 778 **Image analysis**

779 Automated analysis of time-lapse imaging of cell cycle reporters, quantitative image-based  
780 cytometry (QIBC), and Retrospective Time-lapse Synchronized QIBC (RT-QIBC) were  
781 performed using a custom MATLAB (R2020a, MathWorks) pipeline based on previous work  
782 (Cappell et al., 2016). QIBC here is considered to be the high-throughput single-cell  
783 quantification of fixed-cell signals (fluorescent proteins, immunofluorescence, EdU staining,  
784 DNA stain), while RT-QIBC involves the assignment of QIBC measurements to an explicit time  
785 in the cell cycle based on prior time-lapse imaging of cell cycle reporters (N- and C-CRL4<sup>Cdt2</sup>  
786 reporters, APC/C reporter and EYFP-PCNA). In principle, RT-QIBC can be used to quantify any  
787 fixed-cell signal (the techniques used in this study, as well as mRNA or DNA FISH for example)  
788 and retrospectively analyze any live-cell reporter or imaging measurements. Image processing  
789 pipeline and code used to generate all figures in this study have been deposited on Github and  
790 Zenodo (<https://github.com/MeyerLab/image-analysis-ratnayeke-2021>, DOI:

791 10.5281/zenodo.5037903), and data can be downloaded at Dryad  
792 (<https://doi.org/10.5061/dryad.4xgxd2599>).

### 793 *Segmentation and signal quantification*

794 Raw images were flat-field corrected (also known as shading corrected) to correct for uneven  
795 sample illumination. Since images output by the sCMOS camera are the sum of a camera offset  
796 value together with the actual detected signal (which is proportional to the sample illumination),  
797 we subtracted off the camera offset value and then divided the image by an empirically  
798 determined illumination profile. This profile was calculated either from the background  
799 autofluorescence bin areas without cells in live-cell images (aggregated over a large number of  
800 sites), or from sample-free wells filled with autofluorescent blocking buffer A for fixed cell  
801 imaging. Confocal movies were not flat-field corrected due to a lack of uneven illumination.

802 For live-cell imaging, nuclei were automatically segmented from H2B-mTurquoise signal using  
803 a Laplacian of Gaussian blob detector, which in the case of movies with low contrast, was further  
804 refined with active contours. For fixed-cell imaging, nuclei were segmented from the Hoechst  
805 stain using a threshold determined from histogram curvature. Detected nuclei larger than the  
806 median object size were checked using a curvature-based object splitting algorithm which splits  
807 cells along two points of high perimeter-curvature. If there are more than two putative split  
808 points, pairs of points are chosen based on pairs with the highest distance along the perimeter  
809 between points divided by the Euclidean distance of the points. For multi-round fixed cell  
810 imaging, each imaging round was segmented and aligned to each other. Segmentation mask from  
811 a single round (typically the first round) was designated the primary mask and used for  
812 quantification of all rounds.

813 To quantify nuclear cell cycle reporters and fixed-cell signals, the background signal was  
814 estimated by taking the 25<sup>th</sup> percentile of pixels outside of a dilated nuclear mask (dilated 7.8  $\mu\text{m}$   
815 for predominantly nuclear signals, 15.6  $\mu\text{m}$  for signals with cytoplasmic component) and  
816 subtracted off of images. For chromatin-bound CDC45, POLA2, POLD2, POLE2, and  
817 TIMELESS signals, the background was not subtracted during image processing but accounted  
818 for later during analysis. The mean and median signal within the nucleus were then calculated,

819 and for signals with a cytoplasmic component, the median signal within a ring outside of the  
820 nucleus was calculated (region 0.65  $\mu\text{m}$  to 3.25  $\mu\text{m}$  outside the edge of the nucleus). To quantify  
821 puncta area of EYFP-PCNA, a top-hat filter (3 pixel radius for confocal imaging, 2 pixel radius  
822 for wide-field) was applied to the image and a series of thresholds of different stringencies were  
823 manually chosen and applied to minimize false positives and negatives. The total area of pixels  
824 above the thresholds were quantified.

### 825 *Time-lapse tracking*

826 For time-lapse imaging, nuclei were tracked using a nearest-neighbor algorithm between each  
827 frame and its previous frame. To increase tracking fidelity, the total nuclear signal (the sum of  
828 nuclear intensity) was used as an invariant quantity which does not change significantly over  
829 between frames. Using this, putative aberrant merging and splitting of nuclei during  
830 segmentation could be detected and corrected. Mitotic events are detected when two daughter  
831 nuclei are detected within the vicinity of a previous nucleus and have a total nuclear signal which  
832 is approximately equal to the previous nucleus.

833 To match fixed-cells to live cells tracking, fixed-cell images were computationally aligned to  
834 live-cell images using 2D cross-correlation, and cells with their associated measurements were  
835 assigned to their nearest live-cell neighbor. When matching the 20x fixed-cell images back to  
836 10x live-cell images, live images were resized using bicubic interpolation (for alignment and  
837 tracking purposes only) or fixed images were mean-value binned.

### 838 *Cell cycle annotation of live-cell data*

839 Mitosis was annotated during the process of tracking cells, defined at the separation of the two  
840 sets of chromosomes at anaphase. CRL4<sup>Cdt2</sup> activation (defined as the start of CRL4<sup>Cdt2</sup> reporter  
841 degradation) and Cdt1-mCherry degradation start was annotated by subjecting traces following  
842 mitosis or serum-release to a drop detection algorithm. This algorithm detects degradation of the  
843 reporter at a given time based on a set number of frames following it (the number of frames after  
844 a corresponds to the minimum detectable time since degradation start, typically  $\sim 3$  frames). By  
845 detecting points using only a set number of frames beyond the degradation point, we avoid biases  
846 in the accuracy of detecting cells that just recently degraded compared to cells that degraded

847 much earlier. Points were checked based on the slope and curvature of the trace within the  
848 window being low and high enough, respectively, and having a set decrease in the reporter signal  
849 (normalized to reporter expression). APC/C<sup>Cdh1</sup> inactivation (defined as the start of APC/C  
850 reporter accumulation) was detected in a complementary way, identifying the first point where  
851 the slope increases to a threshold level and the reporter increases from a low level to a threshold-  
852 value of persistent increase. All threshold values were empirically determined and validated by  
853 eye on at least 200 traces. For both CRL4<sup>Cdt2</sup> and APC/C reporters, the integrated intensity  
854 within the nucleus was quantified for trace analysis.

855 For identification of the start of S phase from PCNA foci, foci were segmented, and the total area  
856 of foci was quantified. The transition from G1 to S phase is characterized by an increase of low  
857 foci signal to high foci signal. For RT-QIBC analysis, the same algorithm was used for the  
858 APC/C reporter (as the increase in puncta area mirrors the rise in APC/C reporter levels). For  
859 confocal imaging, a dual threshold algorithm was used. A high foci signal threshold that robustly  
860 identified S phase cells was manually determined (50 pixels), and the first point at which the foci  
861 area increased above this threshold and was higher than the previous 4 frames was identified.  
862 Since the high foci signal threshold typically identified a point well after S phase entry, the final  
863 frame before this high identified point which was below a low threshold (3 pixels) was identified  
864 as the true S phase entry point.

#### 865 *RT-QIBC*

866 After automated tracking and quantification of live- and fixed-cell imaging, each cell was  
867 associated with its corresponding annotated cell cycle reporter traces, as well as  
868 multidimensional fixed-cell measurements from QIBC. Based on this, the time elapsed from a  
869 point of interest (such as CRL4<sup>Cdt2</sup> activation or mitosis) was used to arrange fixed-cell  
870 measurements based on time. Conversely, live-cell traces can be selected based on QIBC  
871 measurements (such as the expression of ND-Cdt1). For analyses with high time resolution (e.g.  
872 Figure 1E), time offsets for each imaging site and well were accounted for based on the order of  
873 well acquisition.

#### 874 *Quantification corrections*

875 For experiments with chromatin-bound proteins measured after pre-extraction, there were rare  
876 sections of the samples that were incompletely extracted of soluble proteins. As a proxy for  
877 extraction efficiency, in experiments with APC/C or Cyclin E/A-CDK reporters (which are  
878 soluble), the residual fluorescent protein signal was imaged in addition to immunofluorescence.  
879 Cells that had high fluorescent protein signal for the reporters were considered to be  
880 incompletely extracted and removed from the analysis.

881 For the staining of replication factors in Figures 6 and S6, staining was performed in two rounds.  
882 In the first round, chromatin-bound replication proteins (CDC45, TIMELESS, POLE2, POLA2,  
883 POLD2, PCNA) were stained using Alexa Fluor 647 secondary antibodies simultaneously with  
884 EdU staining with AFDye 488. Fluorophores were then bleached for 1 h, and re-stained for  
885 PCNA using an Alexa Fluor 647 secondary antibody to identify S phase cells. However, there  
886 was a low-intensity residual signal from the first round of staining, which was corrected for using  
887 an empirically determined residual signal scaling factor.

888 For Figure S3A and S3B, H2B-iRFP670 was expressed in a bicistronic vector together with the  
889 APC/C reporter (P2A sequence). As a result, the APC/C reporter signal could be normalized by  
890 the H2B-iRFP670 signal to control for differential expression of the construct between cells.

891 For pre-extraction experiments of replication factors (Figure 6 and S6), outliers resulting from  
892 incompletely extracted cells and imaging artifacts were removed by removing the top 1  
893 percentile of data. In Figure S2B, the outer 1 percentile of CRL4<sup>Cdt2</sup> activation delays from  
894 APC/C<sup>Cdh1</sup> inactivation was removed to account for misidentified cell cycle transitions.

### 895 *Data normalization*

896 For normalized stain quantification, a baseline was calculated from G1 levels of the stain and  
897 subtracted off of all values followed by division by the group to be normalized. For EdU  
898 quantification shown on a linear scale (for dose-responses and chromatin-bound stain linear fits),  
899 the G1 background signal was subtracted off of values for a true zero. For Figure 1F and 1G,  
900 measurements were normalized to the median G2 signal of each protein. For Figures 4E and  
901 S4E, the EdU signal was zeroed and divided by the Dox(-) EdU signal 1 – 1.2 h after S phase  
902 entry to standardize values between replicates.



903 *Statistical analysis*

904 Details of statistical tests can be found in the figure legends. Generally, comparisons were made  
905 with either paired *t*-tests (for tests between multiple independent replicate experiments) or two-  
906 sample *t*-tests for within-experiment comparisons of measurements with an  $\alpha$  of .05.

907 For linear fits of chromatin-bound stains (Figure 6), a linear model with a fixed zero-intercept  
908 was fit using robust fitting with a bisquare weight function (tuning constant of 2). For fitting  
909 dose-response curves, single-cell measurements of EdU and the expression of ND-Cdt1 were fit  
910 to a Hill equation of the form

911 
$$EdU([NDCdt1]) = EdU_{max} - \frac{EdU_{max} - EdU_{min}}{1 + \left(\frac{[NDCdt1]}{IC_{50}}\right)^n}$$

912 , using nonlinear regression.  $EdU_{max}$  is the EdU incorporation of cells without ND-Cdt1, which  
913 was set using cells not expressing ND-Cdt1.  $EdU_{min}$  represents the minimum EdU  
914 incorporation,  $IC_{50}$  is the 50% inhibitory concentration of ND-Cdt1 concentration  $[NDCdt1]$ ,  
915 and  $n$  is the Hill coefficient For Figure 3D and 5D,  $EdU_{min}$ ,  $IC_{50}$  and  $n$  were all fit parameters,  
916 while for Figures 3E, 3D, S3D and S3E,  $EdU_{min}$  was set based on high levels of ND-Cdt1  
917 expression. Nonlinear regression was performed using the Levenberg-Marquardt algorithm  
918 (`nlinfit()` in MATLAB). Initialization parameters for  $EdU_{inhib}$  were estimated from the 5<sup>th</sup>  
919 percentile of EdU signal, while  $IC_{50}$  was initialized based on the median  $[NDCdt1]$  in the cell  
920 population, and  $n$  was initialized as 1.

921 For bootstrapped estimators, samples were resampled at least 1000 times and confidence  
922 intervals were calculated using the percentile method. For raincloud plots (Allen et al., 2019),  
923 which are a combined violin and jitter plot, the data distribution was estimated using a kernel  
924 smoothing density estimate. The solid and dashed lines in the violin plot correspond to the  
925 median and inter-quartile range (IQR).

926 To estimate thresholds in an automated manner for determining cells positive and negative for  
927 QIBC staining (for example chromatin-bound PCNA positive cells for S phase cells), cells

928 known to be in either G1 or S phase based on live-cell imaging were identified, and then the 99<sup>th</sup>  
929 percentile was chosen as the threshold unless otherwise stated.

### 930 *Visualization*

931 For all example cells except for those shown in Figure 7C were extracted from full-sized images  
932 through MATLAB scripts and selected based on RT-QIBC or time-lapse analysis. For Figure  
933 7C, cells were selected for imaging based on being in early or late S phase. An example cell was  
934 chosen and visualized using ImageJ (v1.53, Fiji distribution) (Schindelin et al., 2012; Schneider  
935 et al., 2012) with the QuickFigures plugin (Mazo, 2020).

## 936 *References*

- 937 Allen, M., Poggiali, D., Whitaker, K., Marshall, T.R., Langen, J. van, and Kievit, R.A. (2019).  
938 Raincloud plots: a multi-platform tool for robust data visualization. *Wellcome Open Res* 4, 63.  
939 [10.12688/wellcomeopenres.15191.2](https://doi.org/10.12688/wellcomeopenres.15191.2).
- 940 Arias, E.E., and Walter, J.C. (2005a). Replication-dependent destruction of Cdt1 limits DNA  
941 replication to a single round per cell cycle in *Xenopus* egg extracts. *Gene Dev* 19, 114–126.  
942 [10.1101/gad.1255805](https://doi.org/10.1101/gad.1255805).
- 943 Arias, E.E., and Walter, J.C. (2005b). PCNA functions as a molecular platform to trigger Cdt1  
944 destruction and prevent re-replication. *Nature Cell Biology* 8, 84–90. [10.1038/ncb1346](https://doi.org/10.1038/ncb1346).
- 945 Arias, E.E., and Walter, J.C. (2007). Strength in numbers: preventing rereplication via multiple  
946 mechanisms in eukaryotic cells. *Gene Dev* 21, 497–518. [10.1101/gad.1508907](https://doi.org/10.1101/gad.1508907).
- 947 Bastians, H., Topper, L.M., Gorbisky, G.L., and Ruderman, J.V. (1999). Cell Cycle-regulated  
948 Proteolysis of Mitotic Target Proteins. *Mol Biol Cell* 10, 3927–3941. [10.1091/mbc.10.11.3927](https://doi.org/10.1091/mbc.10.11.3927).
- 949 Bisaria, A., Hayer, A., Garbett, D., Cohen, D., and Meyer, T. (2020). Membrane-proximal F-  
950 actin restricts local membrane protrusions and directs cell migration. *Science* 368, 1205–1210.  
951 [10.1126/science.aay7794](https://doi.org/10.1126/science.aay7794).
- 952 Burgers, P.M.J., and Kunkel, T.A. (2016). Eukaryotic DNA Replication Fork. *Annu Rev*  
953 *Biochem* 86, 1–22. [10.1146/annurev-biochem-061516-044709](https://doi.org/10.1146/annurev-biochem-061516-044709).
- 954 Cappell, S.D., Chung, M., Jaimovich, A., Spencer, S.L., and Meyer, T. (2016). Irreversible APC  
955 Cdh1 Inactivation Underlies the Point of No Return for Cell-Cycle Entry. *Cell* 166, 167–180.  
956 [10.1016/j.cell.2016.05.077](https://doi.org/10.1016/j.cell.2016.05.077).
- 957 Cappell, S.D., Mark, K.G., Garbett, D., Pack, L.R., Rape, M., and Meyer, T. (2018). EMI1  
958 switches from being a substrate to an inhibitor of APC/CCDH1 to start the cell cycle. *Nature*  
959 558, 313–317. [10.1038/s41586-018-0199-7](https://doi.org/10.1038/s41586-018-0199-7).
- 960 Chung, M., Liu, C., Yang, H.W., Köberlin, M.S., Cappell, S.D., and Meyer, T. (2019). Transient  
961 Hysteresis in CDK4/6 Activity Underlies Passage of the Restriction Point in G1. *Mol Cell* 76,  
962 562-573.e4. [10.1016/j.molcel.2019.08.020](https://doi.org/10.1016/j.molcel.2019.08.020).
- 963 Daigh, L.H., Liu, C., Chung, M., Cimprich, K.A., and Meyer, T. (2018). Stochastic Endogenous  
964 Replication Stress Causes ATR-Triggered Fluctuations in CDK2 Activity that Dynamically  
965 Adjust Global DNA Synthesis Rates. *Cell Syst* 7, 17-27.e3. [10.1016/j.cels.2018.05.011](https://doi.org/10.1016/j.cels.2018.05.011).
- 966 Davidson, I.F., Li, A., and Blow, J.J. (2006). Deregulated Replication Licensing Causes DNA  
967 Fragmentation Consistent with Head-to-Tail Fork Collision. *Mol Cell* 24, 433–443.  
968 [10.1016/j.molcel.2006.09.010](https://doi.org/10.1016/j.molcel.2006.09.010).
- 969 Diffley, J.F.X. (2011). Quality control in the initiation of eukaryotic DNA replication.  
970 *Philosophical Transactions Royal Soc B Biological Sci* 366, 3545–3553.  
971 [10.1098/rstb.2011.0073](https://doi.org/10.1098/rstb.2011.0073).

- 972 Dorn, E.S., Chastain, P.D., Hall, J.R., and Cook, J.G. (2009). Analysis of re-replication from  
973 deregulated origin licensing by DNA fiber spreading. *Nucleic Acids Res* 37, 60–69.  
974 10.1093/nar/gkn912.
- 975 Dull, T., Zufferey, R., Kelly, M., Mandel, R.J., Nguyen, M., Trono, D., and Naldini, L. (1998). A  
976 Third-Generation Lentivirus Vector with a Conditional Packaging System. *J Virol* 72, 8463–  
977 8471. 10.1128/jvi.72.11.8463-8471.1998.
- 978 Frigola, J., He, J., Kinkelin, K., Pye, V.E., Renault, L., Douglas, M.E., Remus, D., Cherepanov,  
979 P., Costa, A., and Diffley, J.F.X. (2017). Cdt1 stabilizes an open MCM ring for helicase loading.  
980 *Nat Commun* 8, 15720. 10.1038/ncomms15720.
- 981 Geley, S., Kramer, E., Gieffers, C., Gannon, J., Peters, J.-M., and Hunt, T. (2001). Anaphase-  
982 Promoting Complex/Cyclosome–Dependent Proteolysis of Human Cyclin a Starts at the  
983 Beginning of Mitosis and Is Not Subject to the Spindle Assembly Checkpoint. *J Cell Biology*  
984 153, 137–148. 10.1083/jcb.153.1.137.
- 985 Gookin, S., Min, M., Phadke, H., Chung, M., Moser, J., Miller, I., Carter, D., and Spencer, S.L.  
986 (2017). A map of protein dynamics during cell-cycle progression and cell-cycle exit. *Plos Biol*  
987 15, e2003268. 10.1371/journal.pbio.2003268.
- 988 Grant, G.D., Kedziora, K.M., Limas, J.C., Cook, J.G., and Purvis, J.E. (2018). Accurate  
989 delineation of cell cycle phase transitions in living cells with PIP-FUCCI. *Cell Cycle* 17, 2496–  
990 2516. 10.1080/15384101.2018.1547001.
- 991 Gut, G., Herrmann, M.D., and Pelkmans, L. (2018). Multiplexed protein maps link subcellular  
992 organization to cellular states. *Science* 361, eaar7042. 10.1126/science.aar7042.
- 993 Hahn, A.T., Jones, J.T., and Meyer, T. (2009). Quantitative analysis of cell cycle phase durations  
994 and PC12 differentiation using fluorescent biosensors. *Cell Cycle* 8, 1044–1052.  
995 10.4161/cc.8.7.8042.
- 996 Håland, T.W., Boye, E., Stokke, T., Grallert, B., and Syljuåsen, R.G. (2015). Simultaneous  
997 measurement of passage through the restriction point and MCM loading in single cells. *Nucleic*  
998 *Acids Res* 43, e150–e150. 10.1093/nar/gkv744.
- 999 Havens, C.G., and Walter, J.C. (2009). Docking of a Specialized PIP Box onto Chromatin-  
1000 Bound PCNA Creates a Degron for the Ubiquitin Ligase CRL4Cdt2. *Mol Cell* 35, 93–104.  
1001 10.1016/j.molcel.2009.05.012.
- 1002 Havens, C.G., and Walter, J.C. (2011). Mechanism of CRL4Cdt2, a PCNA-dependent E3  
1003 ubiquitin ligase. *Gene Dev* 25, 1568–1582. 10.1101/gad.2068611.
- 1004 Klotz-Noack, K., McIntosh, D., Schurch, N., Pratt, N., and Blow, J.J. (2012). Re-replication  
1005 induced by geminin depletion occurs from G2 and is enhanced by checkpoint activation. *J Cell*  
1006 *Sci* 125, 2436–2445. 10.1242/jcs.100883.
- 1007 Kubota, S., Fukumoto, Y., Ishibashi, K., Soeda, S., Kubota, S., Yuki, R., Nakayama, Y.,  
1008 Aoyama, K., Yamaguchi, N., and Yamaguchi, N. (2014). Activation of the Prereplication  
1009 Complex Is Blocked by Mimosine through Reactive Oxygen Species-activated Ataxia

- 1010 Telangiectasia Mutated (ATM) Protein without DNA Damage\*. *J Biol Chem* 289, 5730–5746.  
1011 10.1074/jbc.m113.546655.
- 1012 Lan, H., Tang, Z., Jin, H., and Sun, Y. (2016). Neddylation inhibitor MLN4924 suppresses  
1013 growth and migration of human gastric cancer cells. *Scientific Reports* 6, 24218.  
1014 10.1038/srep24218.
- 1015 Lee, K., Fu, H., Aladjem, M.I., and Myung, K. (2013). ATAD5 regulates the lifespan of DNA  
1016 replication factories by modulating PCNA level on the chromatin. *J Cell Biol* 200, 31–44.  
1017 10.1083/jcb.201206084.
- 1018 Lemmens, B., Hegarat, N., Akopyan, K., Sala-Gaston, J., Bartek, J., Hochegger, H., and  
1019 Lindqvist, A. (2018). DNA Replication Determines Timing of Mitosis by Restricting CDK1 and  
1020 PLK1 Activation. *Mol Cell* 71, 117-128.e3. 10.1016/j.molcel.2018.05.026.
- 1021 Leonhardt, H., Rahn, H.-P., Weinzierl, P., Sporbert, A., Cremer, T., Zink, D., and Cardoso, M.C.  
1022 (2000). Dynamics of DNA Replication Factories in Living Cells. *J Cell Biology* 149, 271–280.  
1023 10.1083/jcb.149.2.271.
- 1024 Limas, J.C., and Cook, J.G. (2019). Preparation for DNA replication: the key to a successful S  
1025 phase. *Febs Lett* 593, 2853–2867. 10.1002/1873-3468.13619.
- 1026 Lin, J.J., Milhollen, M.A., Smith, P.G., Narayanan, U., and Dutta, A. (2010). NEDD8-Targeting  
1027 Drug MLN4924 Elicits DNA Rereplication by Stabilizing Cdt1 in S Phase, Triggering  
1028 Checkpoint Activation, Apoptosis, and Senescence in Cancer Cells. *Cancer Res* 70, 10310–  
1029 10320. 10.1158/0008-5472.can-10-2062.
- 1030 Lin, J.-R., Fallahi-Sichani, M., and Sorger, P.K. (2015). Highly multiplexed imaging of single  
1031 cells using a high-throughput cyclic immunofluorescence method. *Nature Communications* 6,  
1032 ncomms9390. 10.1038/ncomms9390.
- 1033 Liu, E., Lee, A.Y.-L., Chiba, T., Olson, E., Sun, P., and Wu, X. (2007). The ATR-mediated S  
1034 phase checkpoint prevents rereplication in mammalian cells when licensing control is disrupted.  
1035 *J Cell Biology* 179, 643–657. 10.1083/jcb.200704138.
- 1036 Mansilla, S.F., Vega, M.B.D.L., Calzetta, N.L., Siri, S.O., and Gottifredi, V. (2020). CDK-  
1037 Independent and PCNA-Dependent Functions of p21 in DNA Replication. *Genes-Basel* 11, 593.  
1038 10.3390/genes11060593.
- 1039 Marco, V.D., Gillespie, P.J., Li, A., Karantzelis, N., Christodoulou, E., Klompaker, R.,  
1040 Gerwen, S. van, Fish, A., Petoukhov, M.V., Iliou, M.S., et al. (2009). Quaternary structure of the  
1041 human Cdt1-Geminin complex regulates DNA replication licensing. *Proc National Acad Sci*  
1042 106, 19807–19812. 10.1073/pnas.0905281106.
- 1043 Matson, J.P., Dumitru, R., Coryell, P., Baxley, R.M., Chen, W., Twaroski, K., Webber, B.R.,  
1044 Tolar, J., Bielinsky, A.-K., Purvis, J.E., et al. (2017). Rapid DNA replication origin licensing  
1045 protects stem cell pluripotency. *Elife* 6, e30473. 10.7554/elife.30473.
- 1046 Mazo, G. (2020). QuickFigures: a tool to quickly transform microscope images into quality  
1047 figures. *Biorxiv* 2020.09.24.311282. 10.1101/2020.09.24.311282.

- 1048 McGarry, T.J., and Kirschner, M.W. (1998). Geminin, an Inhibitor of DNA Replication, Is  
1049 Degraded during Mitosis. *Cell* 93, 1043–1053. 10.1016/s0092-8674(00)81209-x.
- 1050 McIntosh, D., and Blow, J.J. (2012). Dormant Origins, the Licensing Checkpoint, and the  
1051 Response to Replicative Stresses. *Csh Perspect Biol* 4, a012955. 10.1101/cshperspect.a012955.
- 1052 Nakazaki, Y., Tsuyama, T., Seki, M., Takahashi, M., Enomoto, T., and Tada, S. (2016). Excess  
1053 Cdt1 inhibits nascent strand elongation by repressing the progression of replication forks in  
1054 *Xenopus* egg extracts. *Biochem Bioph Res Co* 470, 405–410. 10.1016/j.bbrc.2016.01.028.
- 1055 Nakazaki, Y., Tsuyama, T., Azuma, Y., Takahashi, M., and Tada, S. (2017). Mutant analysis of  
1056 Cdt1's function in suppressing nascent strand elongation during DNA replication in *Xenopus* egg  
1057 extracts. *Biochem Bioph Res Co* 490, 1375–1380. 10.1016/j.bbrc.2017.07.034.
- 1058 Neelsen, K.J., Zanini, I.M.Y., Mijic, S., Herrador, R., Zellweger, R., Chaudhuri, A.R., Creavin,  
1059 K.D., Blow, J.J., and Lopes, M. (2013). Deregulated origin licensing leads to chromosomal  
1060 breaks by rereplication of a gapped DNA template. *Gene Dev* 27, 2537–2542.  
1061 10.1101/gad.226373.113.
- 1062 Pozo, P.N., and Cook, J.G. (2016). Regulation and Function of Cdt1; A Key Factor in Cell  
1063 Proliferation and Genome Stability. *Genes-Basel* 8, 2. 10.3390/genes8010002.
- 1064 Pozo, P.N., Matson, J.P., Cole, Y., Kedziora, K.M., Grant, G.D., Temple, B., and Cook, J.G.  
1065 (2018). Cdt1 variants reveal unanticipated aspects of interactions with cyclin/CDK and MCM  
1066 important for normal genome replication. *Mol Biol Cell* 29, 2989–3002. 10.1091/mbc.e18-04-  
1067 0242.
- 1068 Reuswig, K.-U., and Pfander, B. (2019). Control of Eukaryotic DNA Replication Initiation—  
1069 Mechanisms to Ensure Smooth Transitions. *Genes-Basel* 10, 99. 10.3390/genes10020099.
- 1070 Sakaue-Sawano, A., Yo, M., Komatsu, N., Hiratsuka, T., Kogure, T., Hoshida, T., Goshima, N.,  
1071 Matsuda, M., Miyoshi, H., and Miyawaki, A. (2017). Genetically Encoded Tools for Optical  
1072 Dissection of the Mammalian Cell Cycle. *Mol Cell* 68, 626-640.e5.  
1073 10.1016/j.molcel.2017.10.001.
- 1074 Salic, A., and Mitchison, T.J. (2008). A chemical method for fast and sensitive detection of DNA  
1075 synthesis in vivo. *Proc National Acad Sci* 105, 2415–2420. 10.1073/pnas.0712168105.
- 1076 Schindelin, J., Arganda-Carreras, I., Frise, E., Kaynig, V., Longair, M., Pietzsch, T., Preibisch,  
1077 S., Rueden, C., Saalfeld, S., Schmid, B., et al. (2012). Fiji: an open-source platform for  
1078 biological-image analysis. *Nat Methods* 9, 676–682. 10.1038/nmeth.2019.
- 1079 Schneider, C.A., Rasband, W.S., and Eliceiri, K.W. (2012). NIH Image to ImageJ: 25 years of  
1080 image analysis. *Nat Methods* 9, 671–675. 10.1038/nmeth.2089.
- 1081 Sedlackova, H., Rask, M.-B., Gupta, R., Choudhary, C., Somyajit, K., and Lukas, J. (2020).  
1082 Equilibrium between nascent and parental MCM proteins protects replicating genomes. *Nature*  
1083 1–6. 10.1038/s41586-020-2842-3.
- 1084 Shreeram, S., Sparks, A., Lane, D.P., and Blow, J.J. (2002). Cell type-specific responses of

- 1085 human cells to inhibition of replication licensing. *Oncogene* 21, 6624–6632.  
1086 10.1038/sj.onc.1205910.
- 1087 Sirbu, B.M., Couch, F.B., Feigerle, J.T., Bhaskara, S., Hiebert, S.W., and Cortez, D. (2011).  
1088 Analysis of protein dynamics at active, stalled, and collapsed replication forks. *Gene Dev* 25,  
1089 1320–1327. 10.1101/gad.2053211.
- 1090 Spencer, S.L., Cappell, S.D., Tsai, F.-C., Overton, K.W., Wang, C.L., and Meyer, T. (2013). The  
1091 Proliferation-Quiescence Decision Is Controlled by a Bifurcation in CDK2 Activity at Mitotic  
1092 Exit. *Cell* 155, 369–383. 10.1016/j.cell.2013.08.062.
- 1093 Stallaert, W., Kedziora, K.M., Taylor, C.D., Zikry, T.M., Sobon, H.K., Taylor, S.R., Young,  
1094 C.L., Limas, J.C., Cook, J.G., and Purvis, J.E. (2021). The structure of the human cell cycle.  
1095 *Biorxiv* 2021.02.11.430845. 10.1101/2021.02.11.430845.
- 1096 Stewart, S.A., Dykxhoorn, D.M., Palliser, D., Mizuno, H., Yu, E.Y., An, D.S., Sabatini, D.M.,  
1097 Chen, I.S.Y., Hahn, W.C., Sharp, P.A., et al. (2003). Lentivirus-delivered stable gene silencing  
1098 by RNAi in primary cells. *Rna* 9, 493–501. 10.1261/rna.2192803.
- 1099 Takeda, D.Y., Parvin, J.D., and Dutta, A. (2005). Degradation of Cdt1 during S Phase Is Skp2-  
1100 independent and Is Required for Efficient Progression of Mammalian Cells through S Phase\*. *J*  
1101 *Biol Chem* 280, 23416–23423. 10.1074/jbc.m501208200.
- 1102 Teer, J.K., and Dutta, A. (2008). Human Cdt1 Lacking the Evolutionarily Conserved Region  
1103 That Interacts with MCM2–7 Is Capable of Inducing Re-replication\*. *J Biol Chem* 283, 6817–  
1104 6825. 10.1074/jbc.m708767200.
- 1105 Toledo, L.I., Altmeyer, M., Rask, M.-B., Lukas, C., Larsen, D.H., Povlsen, L.K., Bekker-Jensen,  
1106 S., Mailand, N., Bartek, J., and Lukas, J. (2013). ATR Prohibits Replication Catastrophe by  
1107 Preventing Global Exhaustion of RPA. *Cell* 155, 1088–1103. 10.1016/j.cell.2013.10.043.
- 1108 Truong, L.N., and Wu, X. (2011). Prevention of DNA re-replication in eukaryotic cells. *J Mol*  
1109 *Cell Biol* 3, 13–22. 10.1093/jmcb/mjq052.
- 1110 Tsanov, N., Kermi, C., Coulombe, P., Laan, S.V. der, Hodroj, D., and Maiorano, D. (2014). PIP  
1111 degran proteins, substrates of CRL4Cdt2, and not PIP boxes, interfere with DNA polymerase  $\eta$   
1112 and  $\kappa$  focus formation on UV damage. *Nucleic Acids Res* 42, 3692–3706. 10.1093/nar/gkt1400.
- 1113 Tsuyama, T., Watanabe, S., Aoki, A., Cho, Y., Seki, M., Enomoto, T., and Tada, S. (2009).  
1114 Repression of Nascent Strand Elongation by Deregulated Cdt1 during DNA Replication in  
1115 *Xenopus* Egg Extracts. *Mol Biol Cell* 20, 937–947. 10.1091/mbc.e08-06-0613.
- 1116 Vaziri, C., Saxena, S., Jeon, Y., Lee, C., Murata, K., Machida, Y., Wagle, N., Hwang, D.S., and  
1117 Dutta, A. (2003). A p53-Dependent Checkpoint Pathway Prevents Rereplication. *Mol Cell* 11,  
1118 997–1008. 10.1016/s1097-2765(03)00099-6.
- 1119 Yang, H.W., Cappell, S.D., Jaimovich, A., Liu, C., Chung, M., Daigh, L.H., Pack, L.R., Fan, Y.,  
1120 Regot, S., Covert, M., et al. (2020). Stress-mediated exit to quiescence restricted by increasing  
1121 persistence in CDK4/6 activation. *Elife* 9, e44571. 10.7554/elife.44571.

- 1122 Yu, C., Gan, H., Han, J., Zhou, Z.-X., Jia, S., Chabes, A., Farrugia, G., Ordog, T., and Zhang, Z.  
1123 (2014). Strand-Specific Analysis Shows Protein Binding at Replication Forks and PCNA  
1124 Unloading from Lagging Strands when Forks Stall. *Mol Cell* 56, 551–563.  
1125 10.1016/j.molcel.2014.09.017.
- 1126 Zeman, M.K., and Cimprich, K.A. (2014). Causes and consequences of replication stress. *Nat*  
1127 *Cell Biol* 16, 2–9. 10.1038/ncb2897.
- 1128 Zhou, Y., Pozo, P.N., Oh, S., Stone, H.M., and Cook, J.G. (2020). Distinct and sequential re-  
1129 replication barriers ensure precise genome duplication. *Plos Genet* 16, e1008988.  
1130 10.1371/journal.pgen.1008988.
- 1131



# Figure 1

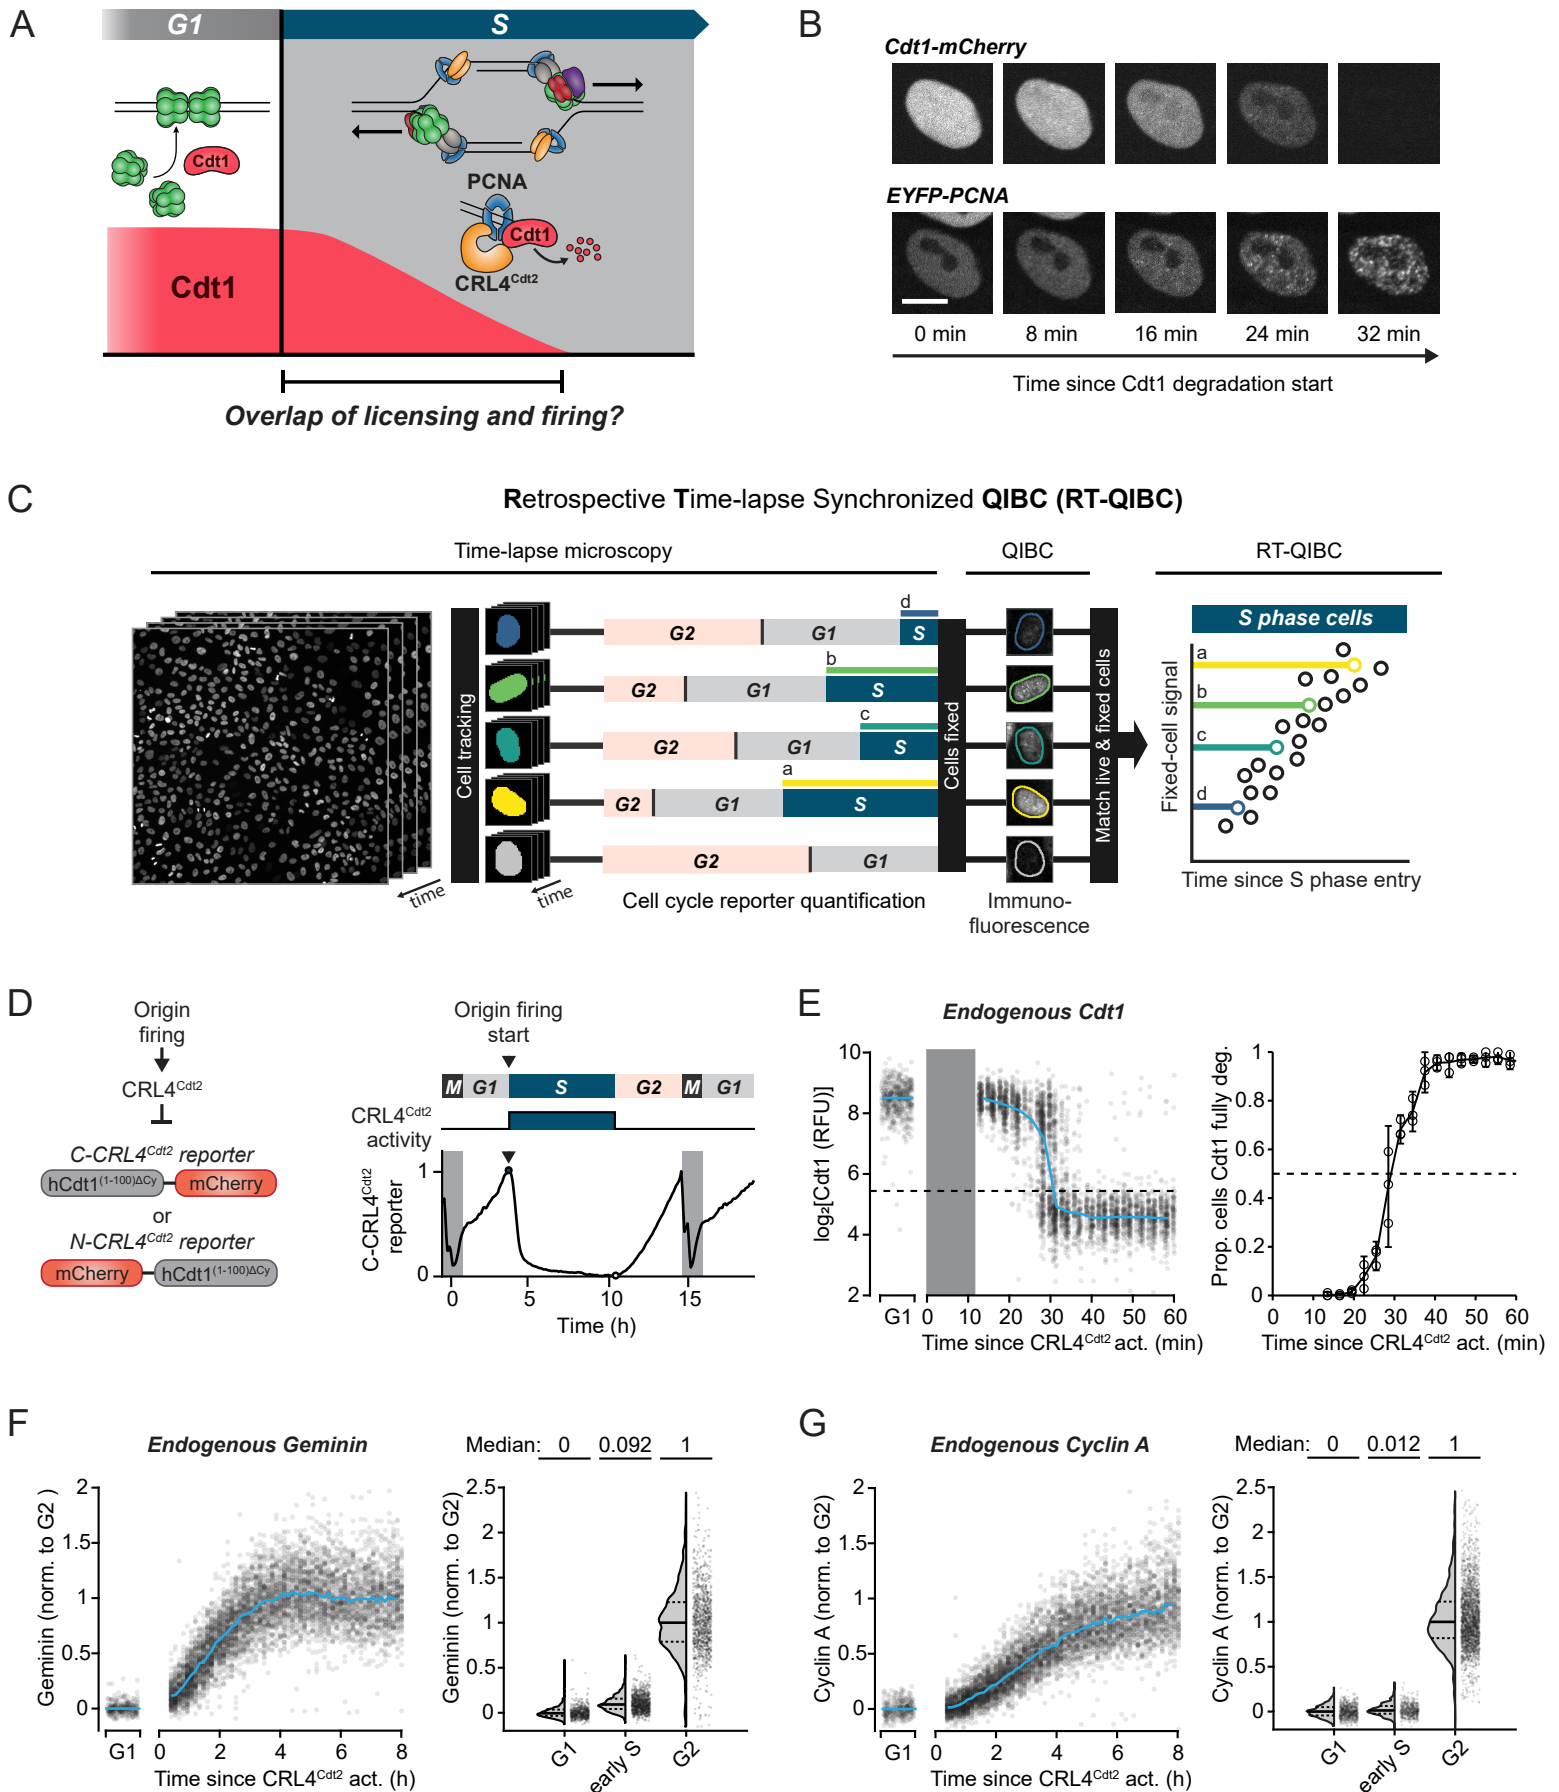

1132 **Figure 1. Cdt1 is present together with fired origins in early S phase**

1133 **(A)** Predicted overlap between licensing factor Cdt1 and origin firing in early S phase, as Cdt1 is  
1134 being degraded by CRL4<sup>Cdt2</sup>.

1135 **(B)** MCF-10A cells expressing EYFP-PCNA and doxycycline-inducible Cdt1-mCherry (induced  
1136 6 h prior to imaging) were imaged using confocal microscopy. Representative of n = 54 cells.  
1137 Scale bar = 10  $\mu$ m. Quantification in Figure S1A.

1138 **(C)** Diagram of Retrospective Time-lapse Synchronized QIBC (RT-QIBC).

1139 **(D)** Left: Live-cell fluorescent reporters of CRL4<sup>Cdt2</sup> activity. Right: Example single cell trace of  
1140 C-CRL4<sup>Cdt2</sup> reporter intensity. Reporter is degraded at S phase start and stabilized at the end of S  
1141 phase.

1142 **(E-G)** RT-QIBC of endogenous protein immunofluorescence (IF) aligned to CRL4<sup>Cdt2</sup> activation  
1143 (C-CRL4<sup>Cdt2</sup> reporter). Cells were live-imaged every 3 min (E) or 8 min (F, G). G1 cells: 1-2 h  
1144 after anaphase. Dashed and solid lines in violin plots are IQR and median, respectively.

1145 **(E)** Left: Cdt1 IF (n = 3,710 S phase cells, 500 G1 cells). Solid curve is median value, dashed  
1146 line is threshold for fully degraded Cdt1. Grey bar is time period that is not observed due to the  
1147 requirement of 12 min of reporter degradation to identify S phase start. Representative of 3  
1148 independent experiments. Right: Quantification of left. Proportion of cells with Cdt1 levels  
1149 below detection limit over time within 3 min bins for 3 independent experiments (n = 3,710,  
1150 1,873, 1,208 cells,  $\geq 36$  cells per bin). Error bars are 95% confidence intervals.

1151 **(F)** Left: Geminin IF (n = 13,262 S phase cells, 300 G1 cells). Right: Comparison of Geminin  
1152 levels in G1 (n = 600 cells), early S (first 30 min, n = 1,051 cells) and G2 (4N DNA and EdU(-),  
1153 n = 1,063 cells) cells. Representative of 3 independent experiments.

1154 **(G)** Left: Cyclin A2 IF (n=13,262 S phase cells, 300 G1 cells). Pool of 10 wells, measured in  
1155 same cells as Figure 1F (left panel). Right: Comparison of Cyclin A levels from left panel. G1  
1156 (n=699 cells), early S (first 30 min, n=503 cells) and G2 (4N DNA and EdU(-), n=2,637 cells)  
1157 cells.

1158 See also Figure S1.

## Figure 2

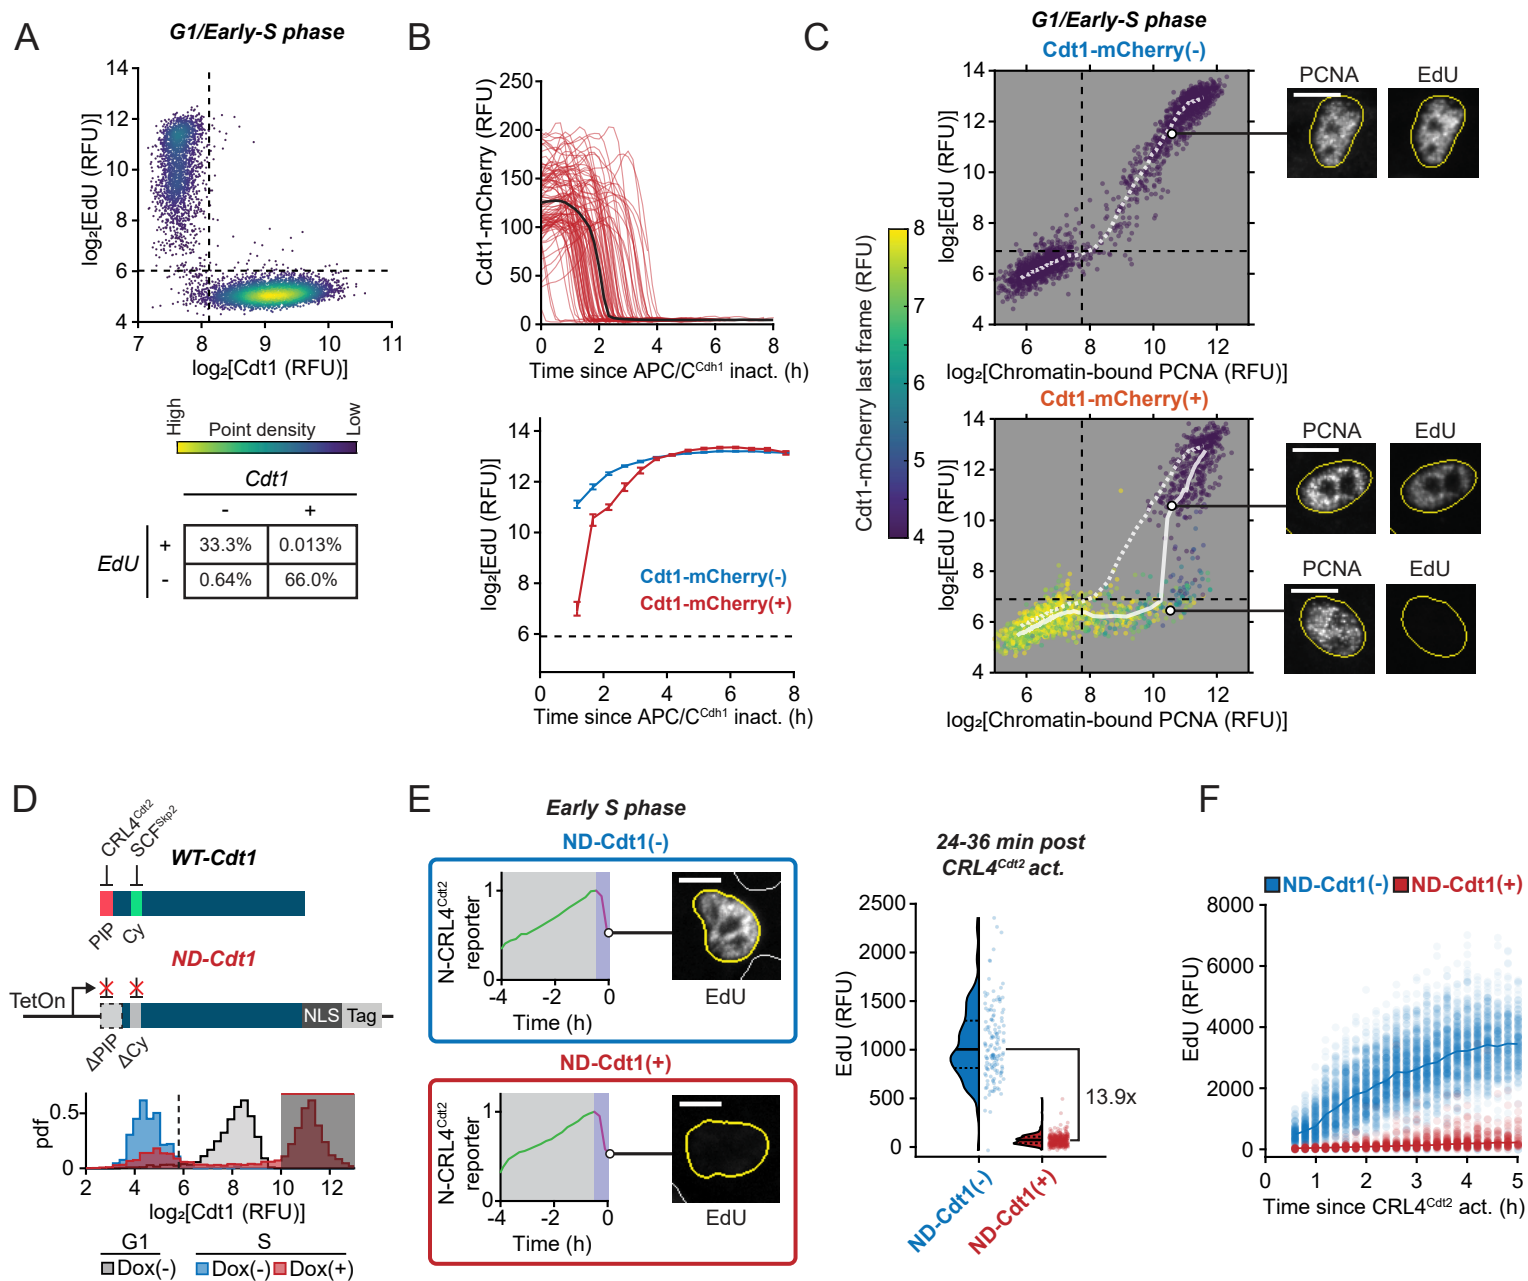

1159 **Figure 2. DNA synthesis is inhibited in the presence of Cdt1**

1160 **(A)** Quantification of Cdt1 immunofluorescence (IF) and EdU incorporation in cells in late G1 to  
1161 early S phase (defined by 2N DNA and intermediate Cyclin E/A-CDK activity of 0.7-1.2, see  
1162 Figure S5A). n = 7,486 cells, representative of 2 independent experiments. Percentage of cells in  
1163 each quadrant is quantified in bottom table.

1164 **(B-C)** RT-QIBC of EdU incorporation and chromatin-bound PCNA in mitogen-released cells  
1165 with the APC/C reporter and doxycycline (Dox)-inducible Cdt1-mCherry, fixed after 18 h. Cdt1-  
1166 mCherry(+) cells were identified from Dox-treated cells while Cdt1-mCherry(-) cells were  
1167 DMSO-treated. Dynamics of mitogen-released cells are in Figures S2A and S2B, and Cdt1-  
1168 mCherry expression compared to endogenous Cdt1 is in Figure S2C.

1169 **(B)** Top: Cdt1-mCherry quantification. Line is median trace (n = 100 traces visualized, median  
1170 of 7,059 cells). Bottom: EdU incorporation in S phase cells (APC/C<sup>Cdh1</sup> inactivated with  
1171 chromatin-bound PCNA). Cdt1-mCherry(-): n=18,367 cells, Cdt1-mCherry(+): 6,970 cells. Line  
1172 is mean and error bar is bootstrapped 95% confidence interval (n ≥ 93 per bin).

1173 **(C)** Chromatin-bound PCNA and EdU incorporation in 2N DNA cells (G1/early S), colored by  
1174 live-imaged Cdt1-mCherry just prior to pre-extraction and fixation. Cdt1-mCherry(-): n= 3,000  
1175 cells, Cdt1-mCherry(+): 2,000 cells. Line is median EdU within bins of chromatin-bound PCNA.  
1176 Representative cells are shown (scale bar = 10 μm).

1177 **(D, E)** RT-QIBC of EdU incorporation in cells overexpressing Dox-inducible non-degradable  
1178 Cdt1 (ND-Cdt1), induced with Dox and live-imaged N-CRL4<sup>Cdt2</sup> reporter for 6 h.

1179 **(D)** Top: ND-Cdt1 was generated from wild-type Cdt1 (WT-Cdt1) by deleting aa1-19 (removing  
1180 PIP degron) and mutating the Cy motif (aa68-70), which is necessary for SCF<sup>Skp2</sup> degradation, to  
1181 alanine. The mutant was fused to an SV40 NLS to ensure proper localization and either an HA or  
1182 mCherry tag. Bottom: ND-Cdt1 expression in S phase compared to endogenous Cdt1 by Cdt1 IF.  
1183 Comparing Cdt1 in G1 cells (1-2 h after mitosis) (grey, n = 2,191 cells), or Cdt1 in S phase cells  
1184 (0.5-1 h after CRL4<sup>Cdt2</sup> activation) with ND-Cdt1 induced (red, n = 6,389 cells) or not induced  
1185 (blue, n = 783 cells). Shaded area represents gate for ND-Cdt1(+) expression selected for EdU  
1186 quantification in Figure 2E.

1187 **(E)** Left: Representative N-CRL4<sup>Cdt2</sup> reporter traces and EdU stain. 10 μm scale bar. Right:  
1188 Quantification of cells 24-36 min after CRL4<sup>Cdt2</sup> activation that divided within 1 h of Dox  
1189 addition. Dashed and solid lines in violin plots are IQR and median, respectively. ND-Cdt1(-): n  
1190 = 141 cells, ND-Cdt1(+): n = 400 cells. Representative of 2 independent experiments.

1191 **(F)** RT-QIBC of EdU incorporation in mitogen-released cells with the N-CRL4<sup>Cdt2</sup> reporter,  
1192 fixed after 18 h. Cells were treated with control siRNA and induced with Dox, performed in  
1193 same experiment as Figure 3D. ND-Cdt1(+) cells were induced with Dox and selected for  
1194 expression based on gating in Figure S2F. ND-Cdt1(-): n= 5,500 cells, ND-Cdt1(+): n = 2,000  
1195 cells. Line is median value at each time point. Representative of 3 independent experiments.

1196 See also Figure S2.

# Figure 3

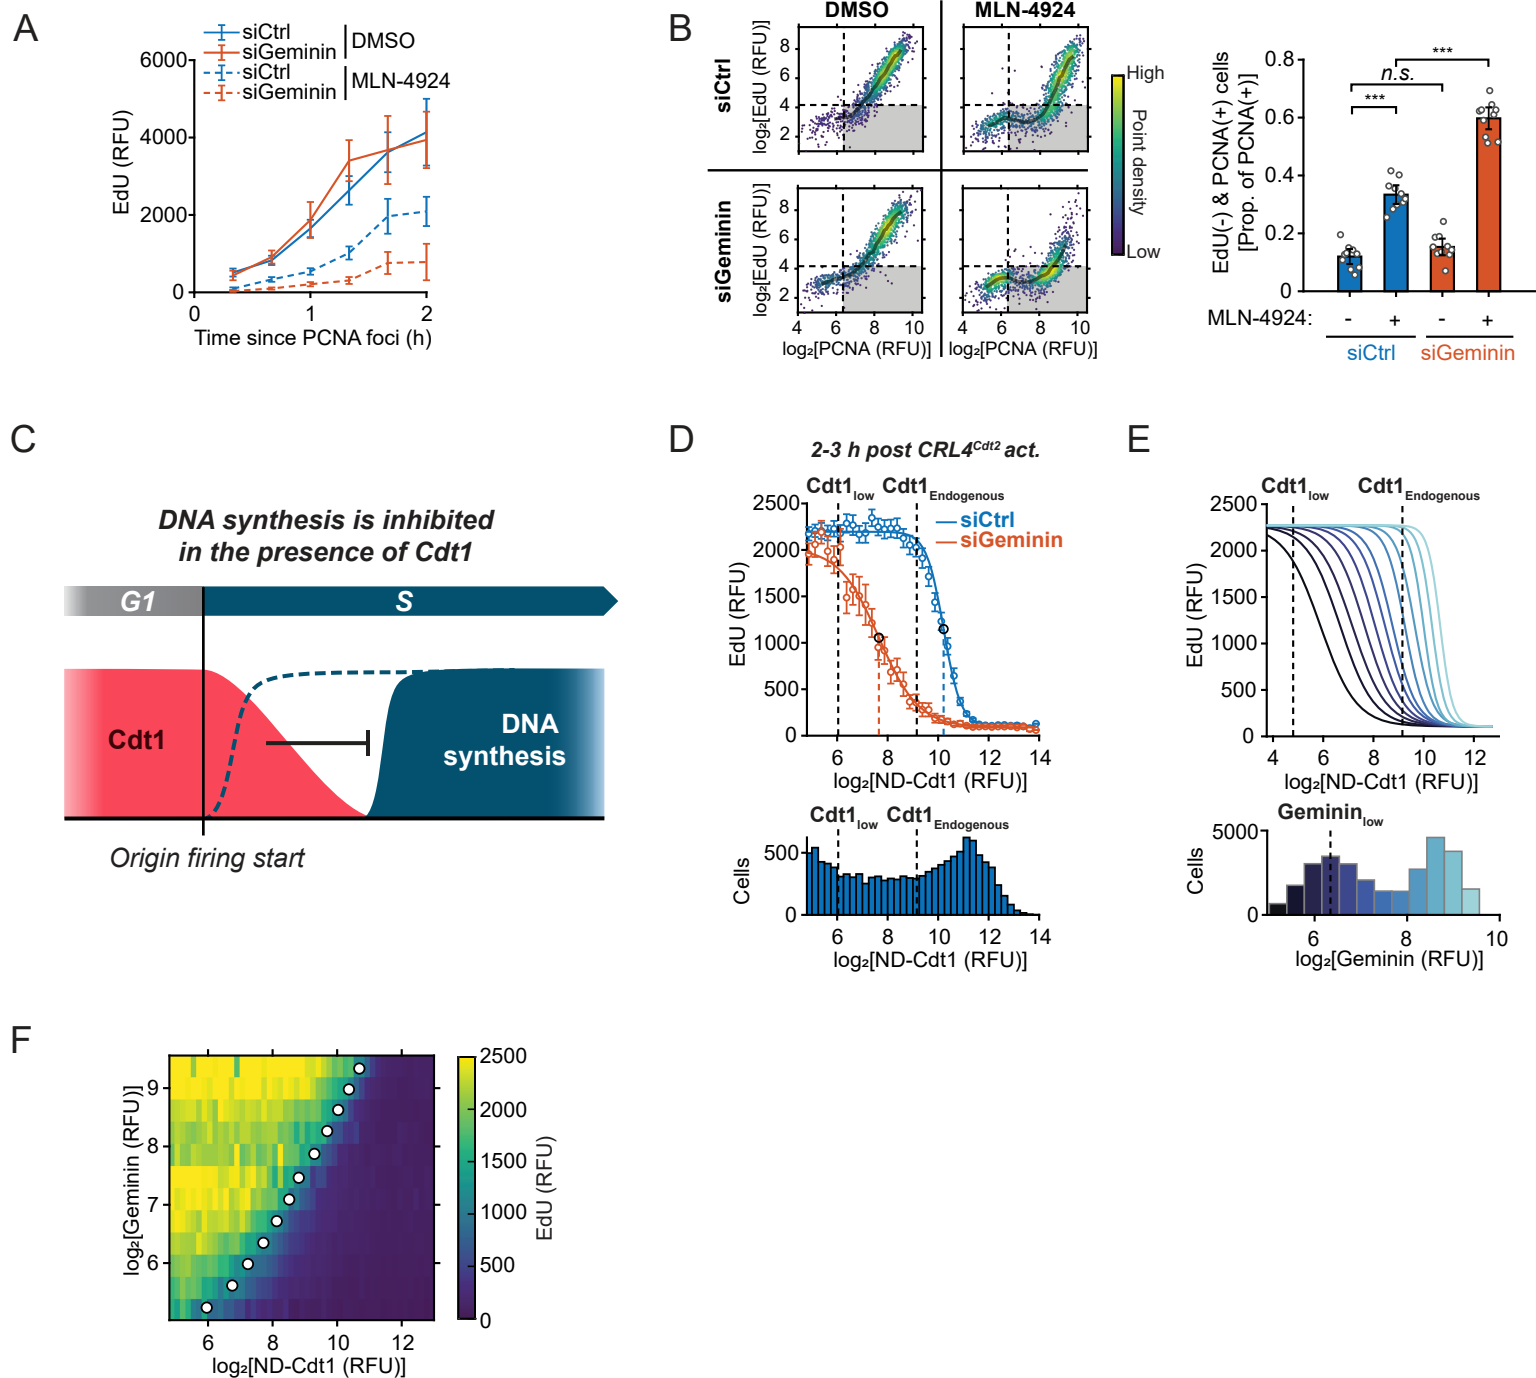

1197 **Figure 3. Endogenous Cdt1 can inhibit DNA synthesis and is counteracted by Geminin**

1198 **(A)** RT-QIBC of EdU incorporation, aligned to S phase start (PCNA foci) in cells treated with  
1199 MLN-4924. Cells were transfected with siRNA for 4 h and then treated with 2  $\mu$ M MLN-4924  
1200 for 3.5 h during live-cell imaging. Points and error bars are mean  $\pm$  2 $\times$ SEM for each time point  
1201 ( $n \geq 8$  for all timepoints,  $n \geq 613$  total for all conditions).

1202 **(B)** RT-QIBC of EdU incorporation and chromatin-bound PCNA in siRNA-treated, mitogen-  
1203 released cells with the APC/C reporter and a Cyclin E/A-CDK activity reporter (see Figure S5A),  
1204 fixed after 18 h. MLN-4924 was added 4 h prior to fixation. Cells 2-3 h after APC/C<sup>Cdh1</sup>  
1205 inactivation with Cyclin E/A-CDK activity  $\geq 0.8$  were analyzed. Cells were pooled from 10  
1206 replicate wells. Left: Dashed lines are thresholds based on G1 levels, and shaded curve is median  
1207 in bins of PCNA levels ( $n \geq 1,369$  cells). Shaded quadrant contains PCNA positive and EdU  
1208 negative cells. Right: Proportion of PCNA positive cells that are EdU negative. Points represent  
1209 proportion in each of 10 wells. Error bars are mean  $\pm$  2 $\times$ SEM. Two-sample *t*-test *p*-values: siCtrl  
1210 DMSO vs. siCtrl MLN-4924 ( $7.8 \times 10^{-6}$ ), siCtrl DMSO vs. siGeminin DMSO (.38), siCtrl MLN-  
1211 4924 vs. siGeminin MLN-4924 ( $2.3 \times 10^{-5}$ ).

1212 **(C)** DNA synthesis is inhibited in the presence of Cdt1 after origin firing.

1213 **(D-F)** RT-QIBC of EdU incorporation in siRNA-treated, mitogen-released cells with N-  
1214 CRL4<sup>Cdt2</sup> reporter. Cells were induced for ND-Cdt1 and fixed after 18 h. Representative of 3  
1215 independent experiments.

1216 **(D)** Top: Dose-response comparison of EdU incorporation. Points and error bars are mean  $\pm$   
1217 2 $\times$ SEM for bins of ND-Cdt1 expression (bins  $\geq 75$  cells, 12,039 cells total siCtrl, 4,573 cells  
1218 total siGeminin). Cells were stratified according to ND-Cdt1 expression levels, and a Hill  
1219 equation was fit to the single-cell measurements. Maximum EdU inhibition was estimated from  
1220 Hill equation fit to be 22.0-fold (siCtrl) and 23.0-fold (siGeminin). Dashed lines represent the  
1221 IC<sub>50</sub> (siCtrl: 10.2, siGeminin: 7.7) and Hill coefficients were 4.2 (siCtrl) and 1.8 (siGeminin).  
1222 Bottom: Corresponding cell counts for bins of ND-Cdt1 levels in cells. Thresholds for equivalent  
1223 ND-Cdt1 expression to endogenous Cdt1 (Cdt1<sub>Endogenous</sub>) and no ND-Cdt1 expression (Cdt1<sub>low</sub>)  
1224 were calculated from Figure S2F.

1225 **(E)** Top: Fit ND-Cdt1 dose-response curves at 12 levels of Geminin expression. Bottom: Bins of  
1226 Geminin expression selected for each of the 12 fits. Dashed line is threshold for low Geminin  
1227 levels. See Figure S3C for siGeminin pooling to generate range of Geminin expression and  
1228 Figure S3D for individual fits.  $n \geq 660$  cells per fit.

1229 **(F)** Heatmap of median EdU incorporation (color) at a given Geminin and ND-Cdt1 level,  
1230 analyzed from same experiment as Figure 2E. Dots represent IC<sub>50</sub> for each dose-response curve  
1231 fit at each Geminin level. ( $n=29,350$  cells total).

1232 See also Figure S3.

## Figure 4

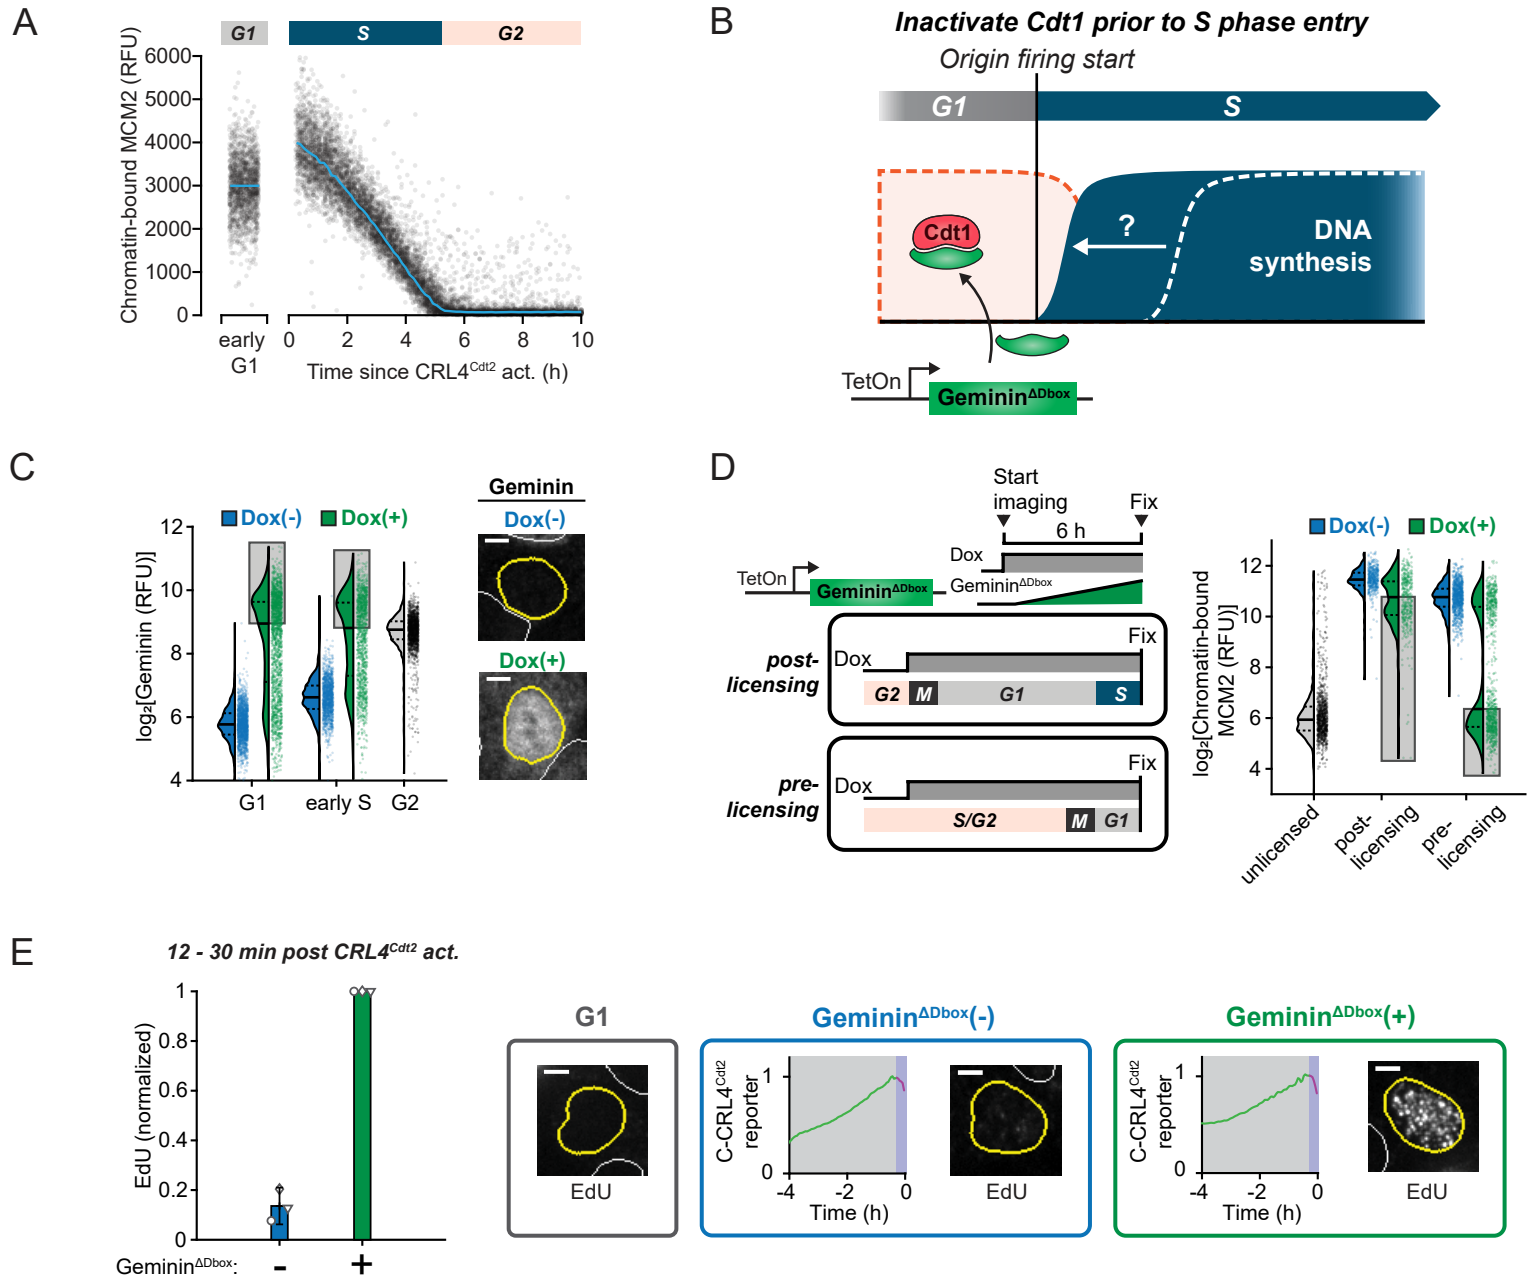

1233 **Figure 4. Cdt1 suppresses DNA synthesis during the overlap period of licensing and firing**

1234 **(A)** RT-QIBC of chromatin-bound MCM2, following S phase entry (C-CRL4<sup>Cdt2</sup> reporter, n =  
1235 10,000 cells) and in early G1 (30 min – 1 h post anaphase, n = 1,500 cells). Pooled from 5 wells.  
1236 Curves are median values.

1237 **(B)** Prematurely inactivating Cdt1 with doxycycline (Dox)-inducible Geminin<sup>ΔDbox</sup> in G1 is  
1238 predicted to accelerate the start of DNA synthesis after origin firing start.

1239 **(C-E)** Geminin<sup>ΔDbox</sup> was induced with Dox during live-cell imaging of C-CRL4<sup>Cdt2</sup> reporter for 6  
1240 h.

1241 **(C)** RT-QIBC of Geminin immunofluorescence (detects endogenous and Geminin<sup>ΔDbox</sup>) Left: G1  
1242 (1-2 h post anaphase), S phase (≤ 0.5 h in S phase) and G2 (4N DNA, EdU(-), no Dox). Shaded  
1243 area is upper 50% of cells in Dox condition, which induce Geminin<sup>ΔDbox</sup> to higher than normal  
1244 G2 levels. Dashed and solid lines in violin plots are IQR and median, respectively. n ≥ 1,316  
1245 cells for each condition. Representative of 3 independent experiments. Right: Example Geminin  
1246 signal in cells ~1 h after anaphase in G1. 5 μm scale bar.

1247 **(D)** Left: Cells were identified in two groups of interest: 1) post-licensing addition in which Dox  
1248 was added to cells ≤ 1 h before mitosis and which were in S phase for ≤ 1 h prior to fixation, and  
1249 2) pre-licensing addition in which Dox was added to cells at least 5 h before mitosis, blocking  
1250 origin licensing. Right: RT-QIBC of chromatin-bound MCM2. Signal from unlicensed cells was  
1251 estimated from G2 MCM2 signal (4N DNA and chromatin-bound PCNA negative). Shaded area  
1252 is lower 50% of cells in Dox condition, corresponding to the approximately 50% of cells which  
1253 induce Geminin<sup>ΔDbox</sup> to higher than G2 levels (Figure 4C). Dashed and solid lines in violin plots  
1254 are IQR and median, respectively. n ≥ 434 in all conditions. Representative of 2 independent  
1255 experiments.

1256 **(E)** RT-QIBC of EdU incorporation in cells with Geminin<sup>ΔDbox</sup> overexpressed, using the same  
1257 gating as post-licensing cells from Figure 4D (Dox added ≤ 1h prior to mitosis). EdU was spiked  
1258 onto cells 30 min prior to fixation during live-cell imaging. Cells that were in S phase for 12-30  
1259 min at fixation time, had not fully degraded Cdt1 were analyzed. Geminin<sup>ΔDbox</sup>(+) and  
1260 Geminin<sup>ΔDbox</sup>(-) cells were selected based on Geminin stain. Left: For each of 3 independent  
1261 experiments, the median of cells was taken (n ≥ 31 cells per replicate per condition;  
1262 Geminin<sup>ΔDbox</sup>(-): 120 cells total; Geminin<sup>ΔDbox</sup>(+): 213 cells total) and normalized to the  
1263 Geminin<sup>ΔDbox</sup>(+) condition. Error bars are mean ± 2×SEM (Geminin<sup>ΔDbox</sup>(-) cells are 13.6 ± 7.4% of  
1264 Geminin<sup>ΔDbox</sup>(+) cells). See Figure S4E for estimated absolute DNA quantification. Right:  
1265 representative EdU images and matching C-CRL4<sup>Cdt2</sup> traces. Geminin<sup>ΔDbox</sup>(-) cell is 17.2 min into  
1266 S phase, Geminin<sup>ΔDbox</sup>(+) cell is 16.9 min into S phase. 5 μm scale bar.

1267 See also Figure S4.





1268 **Figure 5. Cdt1 inhibits DNA synthesis independently of the global intra-S phase checkpoint**  
1269 **and re-replication**

1270 **(A)** RT-QIBC of EdU incorporation,  $\gamma$ H2AX, pChk1(S317) and pChk2(T68) in siGeminin-  
1271 treated, mitogen-released cells with the N-CRL4<sup>Cdt2</sup> reporter. Cells were treated with  
1272 doxycycline (Dox) to induce ND-Cdt1 and fixed after 18 h. G1 cells had inactive CRL4<sup>Cdt2</sup> with  
1273 2N DNA, while S phase cells were 1-2 h into S phase. Positive control for  $\gamma$ H2AX, pChk1(S317)  
1274 and pChk2(T68) staining was measured in cells treated with Wee1i for 4 h in S phase cells which  
1275 caused an accumulation of DNA damage.  $n \geq 146$  cells for all conditions, representative of 2  
1276 independent experiments.

1277 **(B)** Left: Cyclin E/A-CDK activity is responsive to intra-S phase checkpoint activation. Right:  
1278 Mitogen-released cells with N-CRL4<sup>Cdt2</sup> and Cyclin E/A-CDK reporters were treated with Dox  
1279 to induce ND-Cdt1 and imaged for 18 h. 14 h after release, 2  $\mu$ M AZ-20 (ATRi), 1  $\mu$ M MK-  
1280 1775 (Wee1i) or 2 mM hydroxyurea (HU) were added to cells. Cells that received drug 1-2 h  
1281 (dashed line is 1.5 h) prior to S phase entry were identified. Curves are mean traces, and the top  
1282 and bottom of shaded area are  $2 \times$ SEM.  $n = 167$  (DMSO), 145 (ATRi), 239 (Wee1i) and 119  
1283 (HU) cell traces. Representative of 2 independent experiments.

1284 **(C)** Mitogen-released cells with N-CRL4<sup>Cdt2</sup> and Cyclin E/A-CDK reporters were induced with  
1285 Dox to express ND-Cdt1 and imaged for 18 h. 14 h after release 2 mM HU was added to control  
1286 cells. Cells were stained for ND-Cdt1 at the end of the experiment, and ND-Cdt1(+) cells were  
1287 selected for analysis. Change from Cyclin E/A-CDK activity at S phase start is shown. Lines and  
1288 shaded area are mean  $\pm 2 \times$ SEM.  $n \geq 336$  cell traces for all conditions. Representative of 2  
1289 independent experiments.

1290 **(D)** EdU incorporation dose-responses to ND-Cdt1 in the presence of 2  $\mu$ M ATRi and 1  $\mu$ M  
1291 Wee1i. Mitogen-released, siGeminin treated cells with the N-CRL4<sup>Cdt2</sup> reporter and ND-Cdt1  
1292 induced by Dox were fixed after 18 h. Drugs were added 4 h prior to fixation, and S phase cells  
1293 that received the drug 1-2 h before S phase entry were selected. Points and error bars are mean  $\pm$   
1294  $2 \times$ SEM for bins of ND-Cdt1 expression (bins  $\geq 12$  cells, and  $\geq 770$  cells total for all conditions).  
1295 Estimated maximum EdU inhibition was 25.7-fold (DMSO), 17.6-fold (ATRi) and 17.0-fold  
1296 (Wee1i). Representative of 2 independent experiments (same experiment as Figure 5A).

1297 **(E)** RPE-1 *p53*<sup>-/-</sup> *CDC6*<sup>d/d</sup> cells had an auxin-inducible degron (mAID) and SMASH-tag knocked-  
1298 in to both endogenous *CDC6* loci. Additionally, these cells contained a Dox-inducible OsTIR1  
1299 E3 ubiquitin ligase component which is required for mAID degradation. The addition of auxin to  
1300 cells triggers the degradation of mAID containing proteins. The SMASH-tag contains degron  
1301 which is auto-cleaved after protein translation by a protease domain. Addition of BMS-650032  
1302 (BMS) inhibits this auto-cleavage, resulting in protein degradation. Thus, addition of  
1303 Dox/Auxin/BMS triggers a robust degradation of endogenous Cdc6.

1304 **(F)** Dox inducible constructs ND-Cdt1-mCherry or NLS-mCherry were introduced into RPE-1  
1305 *p53*<sup>-/-</sup> *CDC6*<sup>d/d</sup> cells with the APC/C reporter. Cells were mitogen-released in the presence of  
1306 mimosine and Dox for 18 h. Cdc6 was then degraded by adding auxin and BMS-650032 (BMS)  
1307 for 4 h, and then cells were released from mimosine arrest for 1.5 h followed by an EdU pulse  
1308 and fixation.

1309 **(G)** Left: Western blot of Cdc6 levels during experiment, comparing acute 4 h Cdc6 degradation  
1310 to long-term Cdc6 degradation for 22 h from the time of serum release. Upper band is Cdc6  
1311 which has uncleaved SMASh-tag. Right: QIBC of EdU incorporation. S phase cells were  
1312 selected based on having inactive APC/C<sup>Cdh1</sup>. Unreleased cells were not released from mimosine  
1313 arrest. NLS-mCherry/ND-Cdt1-mCherry positive cells were chosen based on gates Figure S5D.  
1314 n=1,120 cells (unreleased), 2,000 cells (other conditions). Representative of 2 independent  
1315 experiments.

1316 See also Figure S5.

## Figure 6

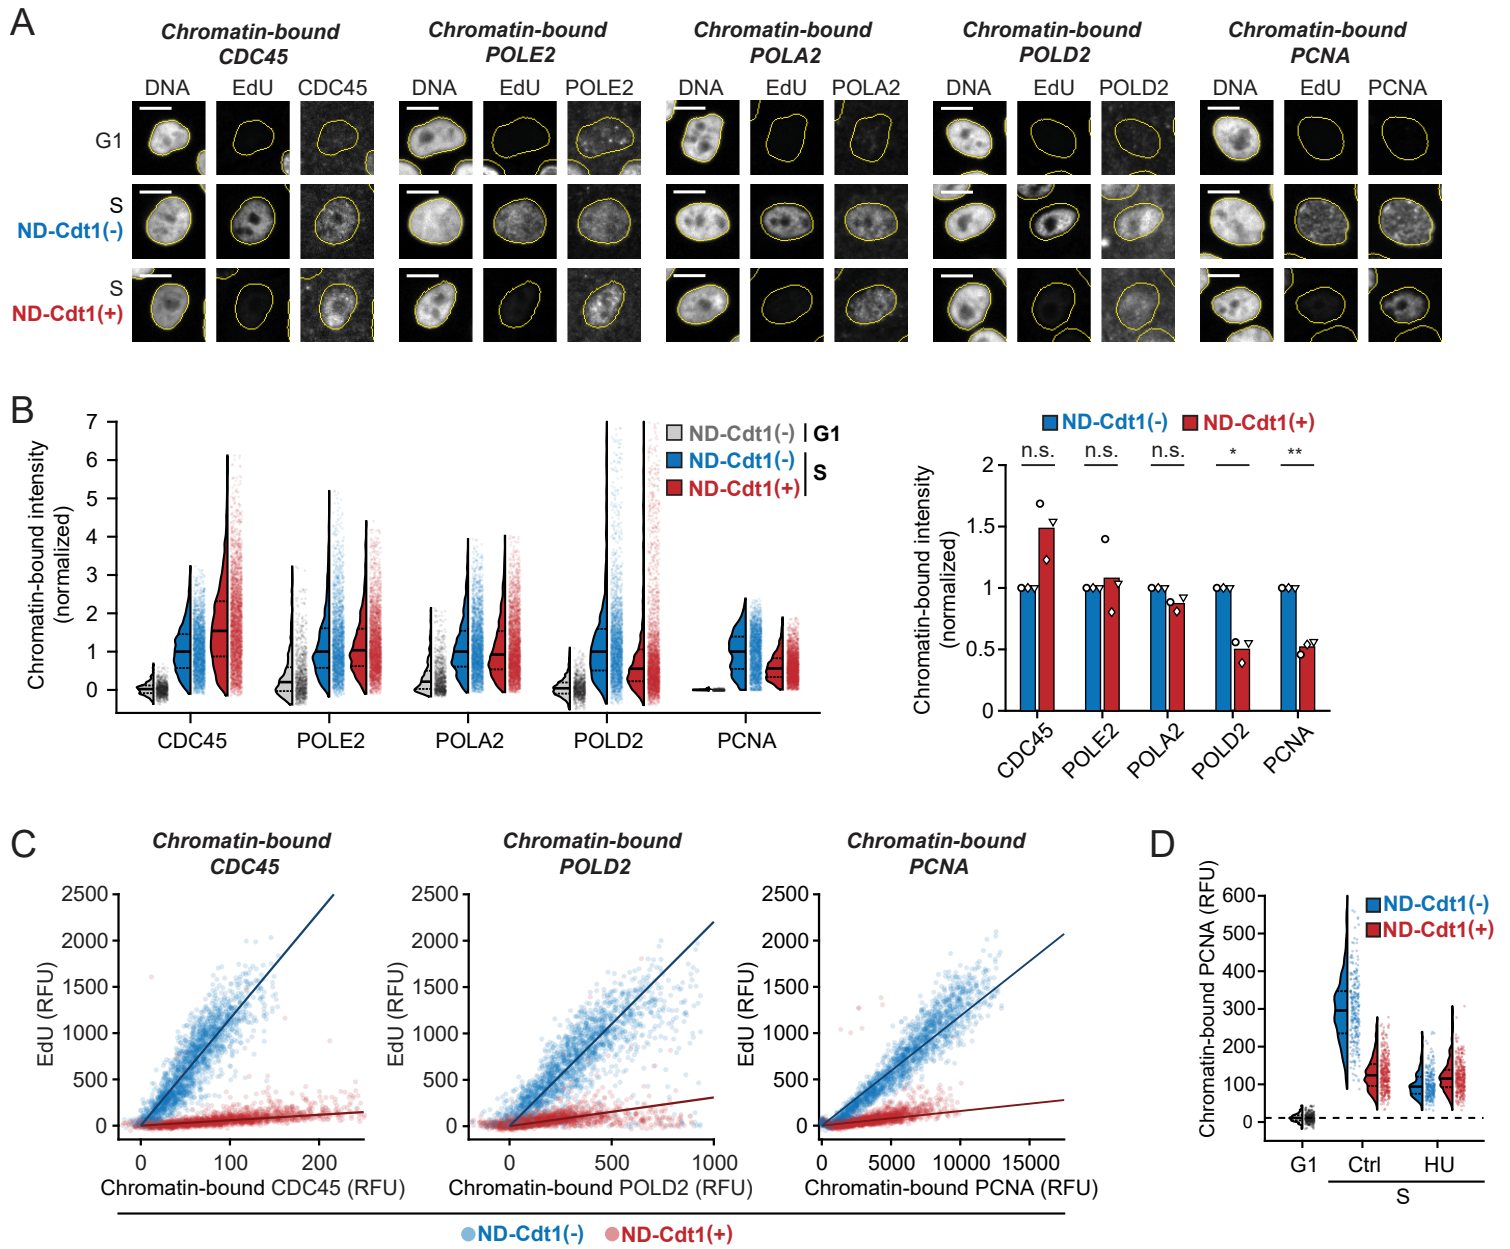

1317 **Figure 6. Cdt1 inhibits replication fork elongation while permitting origin firing**

1318 **(A-C)** RT-QIBC of chromatin-bound replisome components in cells with doxycycline (Dox)-  
1319 inducible ND-Cdt1-mCherry. Mitogen-released cells with the APC/C reporter were induced with  
1320 Dox and released for 18 h. G1 cells had active APC/C<sup>Cdh1</sup> without chromatin-bound PCNA (co-  
1321 stained with all proteins). S phase cells were 1-3 h post APC/C<sup>Cdh1</sup> inactivation with chromatin-  
1322 bound PCNA. Cells which expressed ND-Cdt1-mCherry during live imaging were selected for  
1323 ND-Cdt1(+). Representative of 3 independent experiments. TIMELESS analysis in Figures S6B  
1324 and S6C.

1325 **(A)** Representative cell images of EdU and chromatin-bound CDC45, Pol ε (POLE2), Pol α  
1326 (POLA2), Pol δ (POLD2) and PCNA. Scale bar = 10 μm.

1327 **(B)** Quantification of chromatin-bound replisome components. G1 mode intensities were  
1328 subtracted off signals and values were normalized to ND-Cdt1(-). Left: G1 (in absence of ND-  
1329 Cdt1-mCherry) vs. S phase. Dashed and solid lines in violin plots are IQR and median  
1330 respectively. n = 2,000 cells per condition. Right: Summary of median values from 3  
1331 independent experiments of left panel. One-sample Student's t-test was performed on normalized  
1332 Dox cells. *p*-values CDC45 (n.s.):  $6.94 \times 10^{-2}$ , POLE2 (n.s.): .693, POLA2 (n.s.):  $6.41 \times 10^{-2}$ ,  
1333 POLD2 (\*):  $1.21 \times 10^{-2}$ , PCNA (\*\*):  $4.3 \times 10^{-3}$ .

1334 **(C)** Analysis of EdU incorporation relative to chromatin-bound CDC45, POLD2 and PCNA. Fit  
1335 line is from linear regression (n = 2,000 cells each condition). Other stains and summary in  
1336 Figures S6D and S6E.

1337 **(D)** RT-QIBC of chromatin-bound PCNA. Mitogen-released cells with the APC/C reporter were  
1338 induced with Dox and released for 18 h. During final 4 h of imaging, cells were treated with 2  
1339 mM hydroxyurea (HU) and then fixed. G1 cells had active APC/C<sup>Cdh1</sup> without chromatin-bound  
1340 PCNA, while S phase cells were fixed 2-3 h after APC/C<sup>Cdh1</sup> inactivation and were chromatin-  
1341 bound PCNA positive. n ≥ 281 cells for all conditions. Representative of 3 independent  
1342 experiments.

1343 See also Figure S6.

# Figure 7

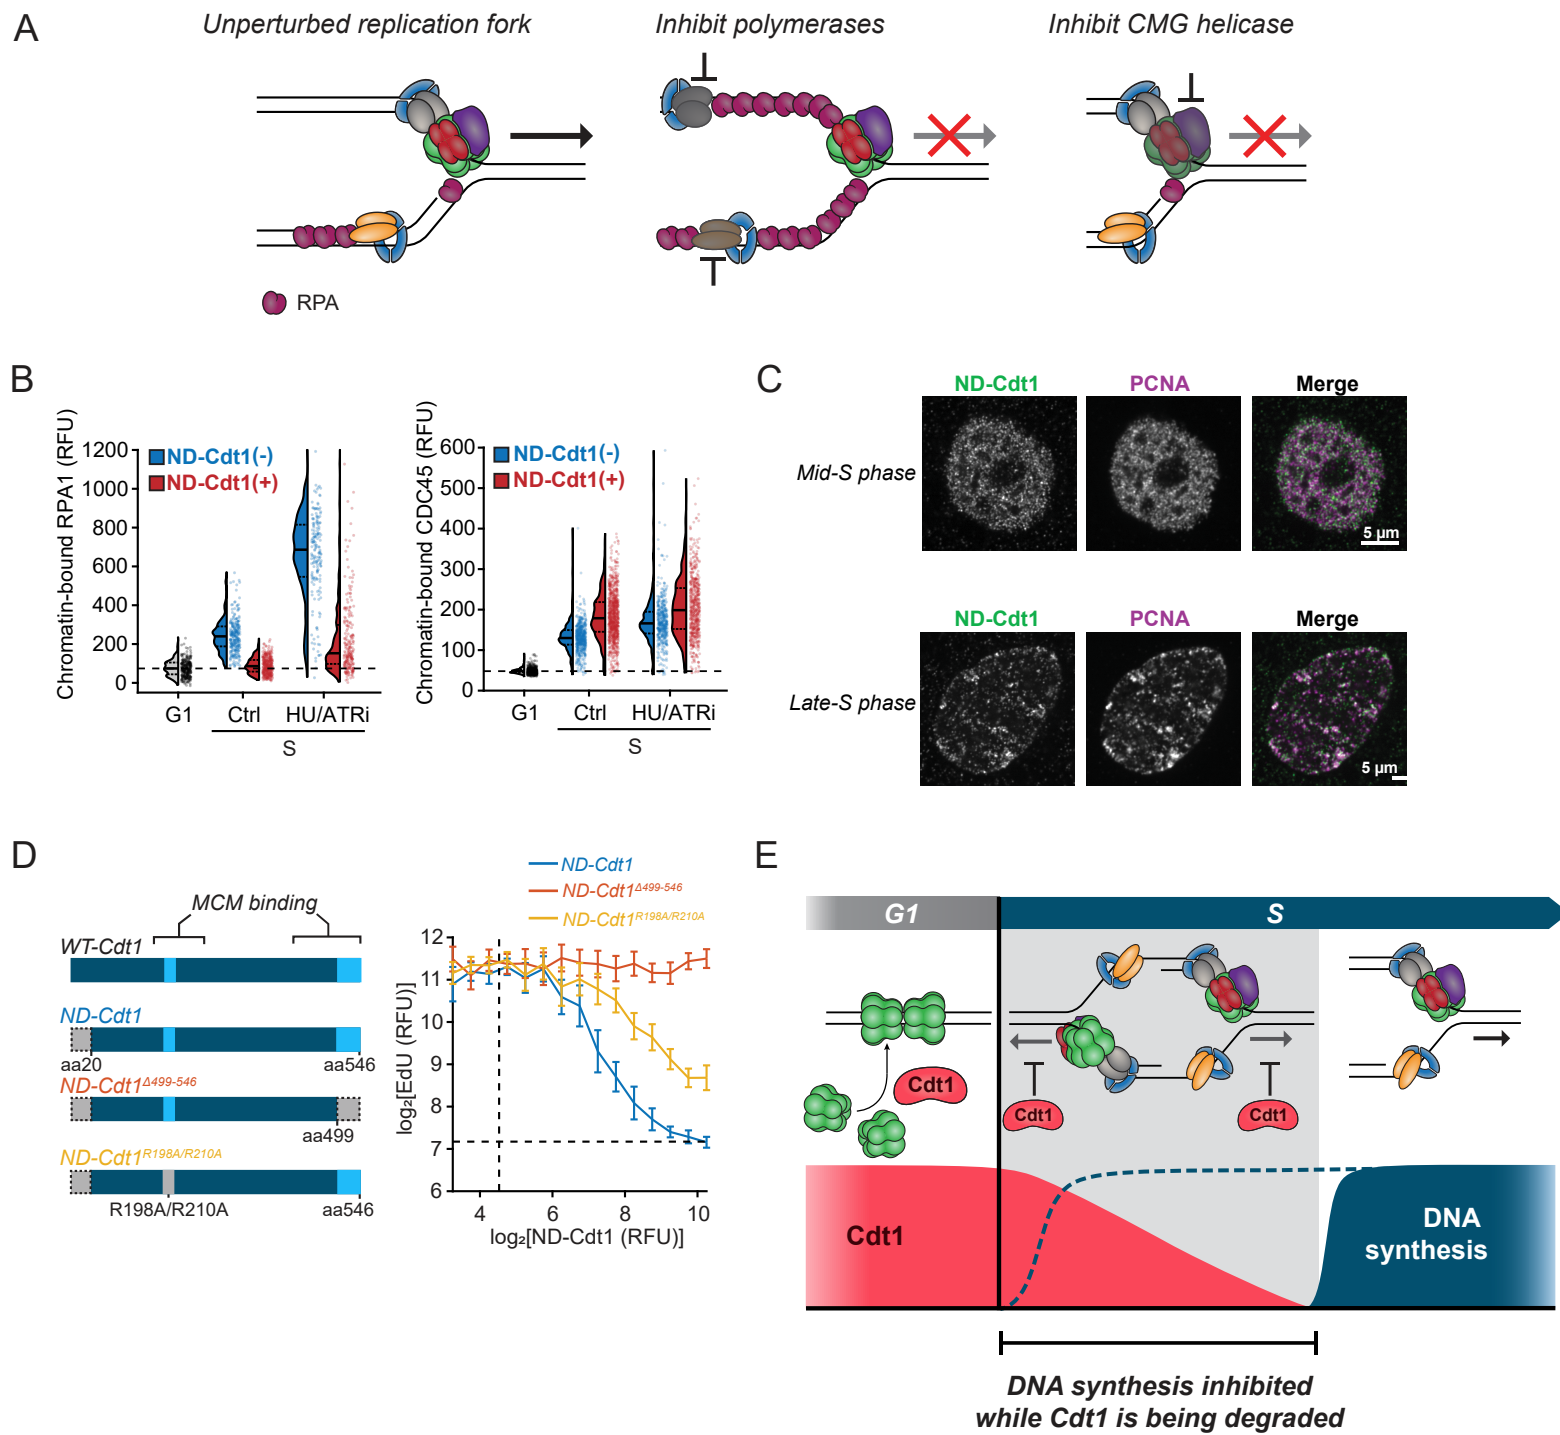

1344 **Figure 7. Cdt1 inhibits CMG helicase progression through its MCM-binding domain**

1345 **(A)** Replication fork progression can be inhibited by inhibiting CMG helicase progression or  
1346 inhibiting DNA polymerases.

1347 **(B)** RT-QIBC of chromatin-bound RPA1 and CDC45. Mitogen-released cells with the APC/C  
1348 reporter were released for 18 h and ND-Cdt1-mCherry was induced with doxycycline (Dox).  
1349 During the final 4 h of imaging, cells were treated with 2 mM hydroxyurea (HU) and 2  $\mu$ M AZ-  
1350 20 (ATRi). G1 cells had active APC/C<sup>Cdh1</sup> without chromatin-bound PCNA, while S phase cells  
1351 were fixed 2-3 h after APC/C<sup>Cdh1</sup> inactivation and were chromatin-bound PCNA positive.  $n \geq$   
1352 182 cells (RPA1) and  $n \geq 504$  cells (CDC45) for all conditions. Representative of 3 independent  
1353 experiments.

1354 **(C)** Localization of chromatin-bound ND-Cdt1. Mitogen-released cells were treated with Dox  
1355 and siGeminin to prevent the inactivation of ND-Cdt1 by Geminin. Cells were then pre-extracted  
1356 after 18 h and co-stained for ND-Cdt1 (HA-tag) and PCNA. Cells were imaged using SoRa  
1357 confocal microscopy and staged as either mid or late S phase based on the pattern of PCNA.  
1358 Each image representative of  $\geq 5$  cells.

1359 **(D)** Left: MCM-binding region mutants of ND-Cdt1 were generated and introduced into cells in  
1360 Dox-inducible constructs. WT-Cdt1 = wild-type Cdt1. Right: Mitogen-released cells with the N-  
1361 CRL4<sup>Cdt2</sup> reporter, treated with siGeminin and induced with Dox, were imaged for 18 h and then  
1362 fixed. RT-QIBC of EdU incorporation and ND-Cdt1 staining (HA-tag) was performed and dose-  
1363 responses of EdU 1-2 h after S phase entry were made. Points and error bars are mean  $\pm 2 \times$ SEM  
1364 in bins of ND-Cdt1 expression ( $n \geq 26$  cells for all bins  $n \geq 1,048$  cells total for each condition).  
1365 Dashed lines were means calculated from cells uninduced with Dox (for ND-Cdt1) or G1 cells  
1366 (for EdU).

1367 **(E)** Cdt1 degradation by CRL4<sup>Cdt2</sup> is triggered by the start of origin firing. As Cdt1 is degraded  
1368 to low levels, it inhibits CMG helicase progression to limit synthesized DNA production while  
1369 Cdt1 is still present. DNA synthesis then commences in full following Cdt1 degradation.

1370 See also Figure S7.

## Figure S1

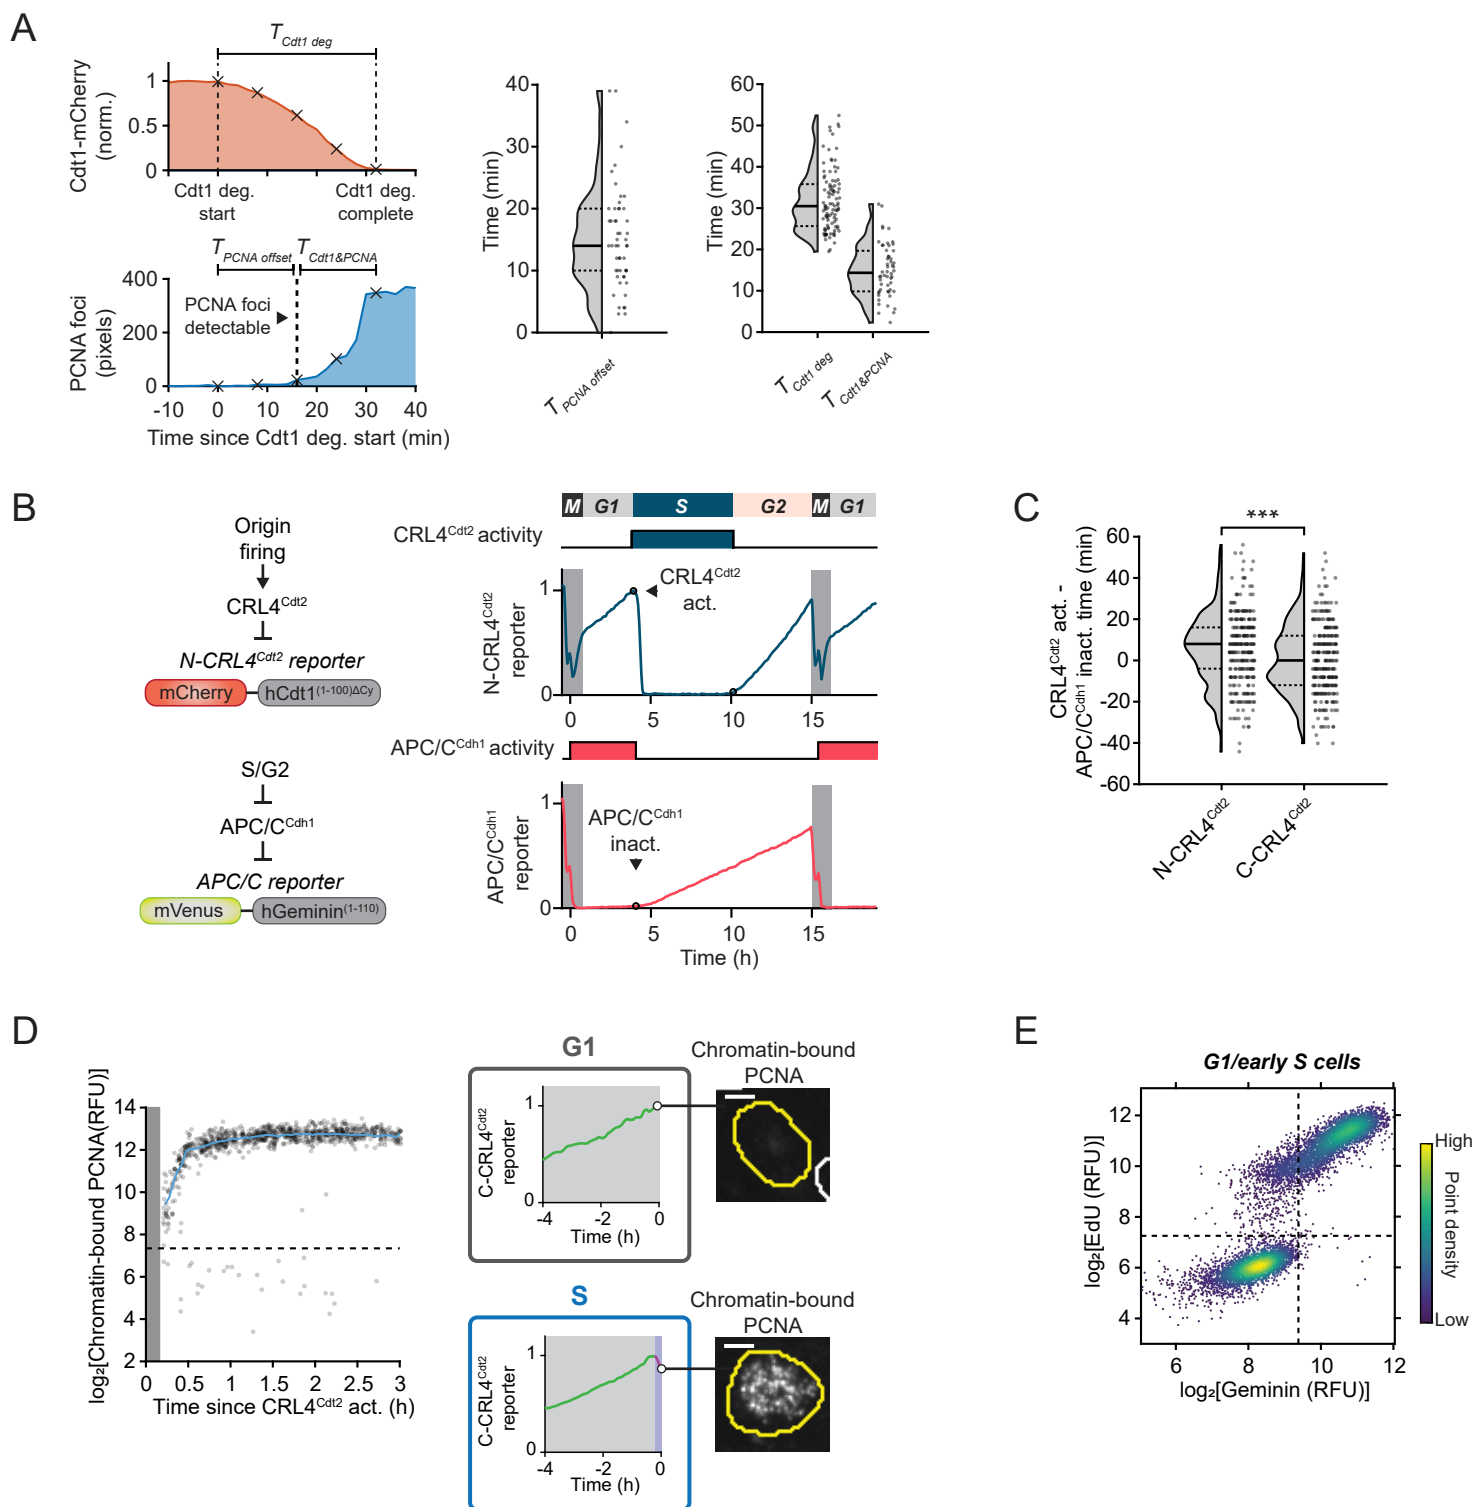



1371 **Figure S1. Related to Figure 1**

1372 **(A)** MCF-10A cells expressing EYFP-PCNA and doxycycline-inducible Cdt1-mCherry (induced  
1373 6 h prior to imaging) were imaged every 2 min using confocal microscopy. Quantification of  
1374 PCNA foci detection relative to Cdt1 degradation in cells from Figure 1B. Left: Reporters were  
1375 quantified to determine the time between the start of Cdt1 degradation and first detectable PCNA  
1376 foci ( $T_{PCNA\ offset}$ ), the total time it takes for Cdt1 to be degraded ( $T_{Cdt1\ deg}$ ) and the overlap duration  
1377 when Cdt1 and PCNA foci are simultaneously visible ( $T_{Cdt1\&PCNA}$ ). Black  $\times$  corresponds to  
1378 frames shown in example cell in Figure 1B. Middle: Quantification of the delay in PCNA foci  
1379 detection from the start of Cdt1 degradation ( $T_{PCNA\ offset}$ ,  $n = 54$  cells). Offset likely represents the  
1380 amount of time it takes for PCNA foci to grow large enough to be detectable over soluble pool of  
1381 PCNA. Right: Quantification of  $T_{Cdt1\ deg}$  ( $n = 99$  cells) and  $T_{Cdt1\&PCNA}$  ( $n = 54$  cells). Cells pooled  
1382 from 4 independent experiments. Dashed and solid lines in violin plots are IQR and median,  
1383 respectively.

1384 **(B)** Live-cell reporters of CRL4<sup>Cdt2</sup> and APC/C activity. APC/C reporter is degraded throughout  
1385 G1 and rises after APC/C<sup>Cdh1</sup> inactivation. Example traces of N-CRL4<sup>Cdt2</sup> reporter and APC/C  
1386 reporter.

1387 **(C)** Quantification of CRL4<sup>Cdt2</sup> activation timing for N-CRL4<sup>Cdt2</sup> and C-CRL4<sup>Cdt2</sup> reporters  
1388 relative to APC/C<sup>Cdh1</sup> inactivation. Positive values signify CRL4<sup>Cdt2</sup> activation after APC/C<sup>Cdh1</sup>  
1389 inactivation.  $n = 300$  cells each condition, representative of 2 independent experiments. C-  
1390 CRL4<sup>Cdt2</sup> reporter is degraded earlier relative to APC/C<sup>Cdh1</sup> inactivation (\*\* $p$ -value =  $1.3 \times 10^{-4}$ ,  
1391 two-sample  $t$ -test, 95% confidence interval 2.6-8.0 min earlier), indicating it is slightly more  
1392 responsive to initial origin firing. Dashed and solid lines in violin plots are IQR and median,  
1393 respectively.

1394 **(D)** RT-QIBC of chromatin-bound PCNA after degradation of the C-CRL4<sup>Cdt2</sup> reporter starts.  
1395 Cells were live-imaged every 3 min, and at the end of imaging, cells were immediately pre-  
1396 extracted and stained for PCNA. Left: Dashed line is PCNA threshold (95<sup>th</sup> percentile of G1  
1397 cells, 1-2 h after mitosis). Grey bar is time period that is not observed due to the need to have 12  
1398 min of reporter degradation to call S phase start. Cells that were identified as having degraded  
1399 the C-CRL4<sup>Cdt2</sup> reporter have chromatin-bound PCNA, indicating that origin firing has occurred.  
1400 The small percentage of cells below the threshold (2.51% of 10,113 cells) had misidentified C-  
1401 CRL4<sup>Cdt2</sup> degradation, verified manually. Representative of 2 independent experiments. Right:  
1402 Example traces and chromatin-bound PCNA stain in G1 (no C-CRL4<sup>Cdt2</sup> degradation) or just  
1403 after S phase entry (C-CRL4<sup>Cdt2</sup> degradation). 5  $\mu$ m scale bar.

1404 **(E)** RT-QIBC in cycling cells of endogenous Geminin and EdU incorporation in cells in G1 to  
1405 early S (cells selected 3-7 h post mitosis,  $n = 9,605$  cells, representative of 3 independent  
1406 experiments). Lines demarcate Geminin and EdU positive/negative regions (99<sup>th</sup> percentile of G1  
1407 cells). Note large population of EdU positive, Geminin negative cells, indicating cells which  
1408 entered S phase with low Geminin.

## Figure S2

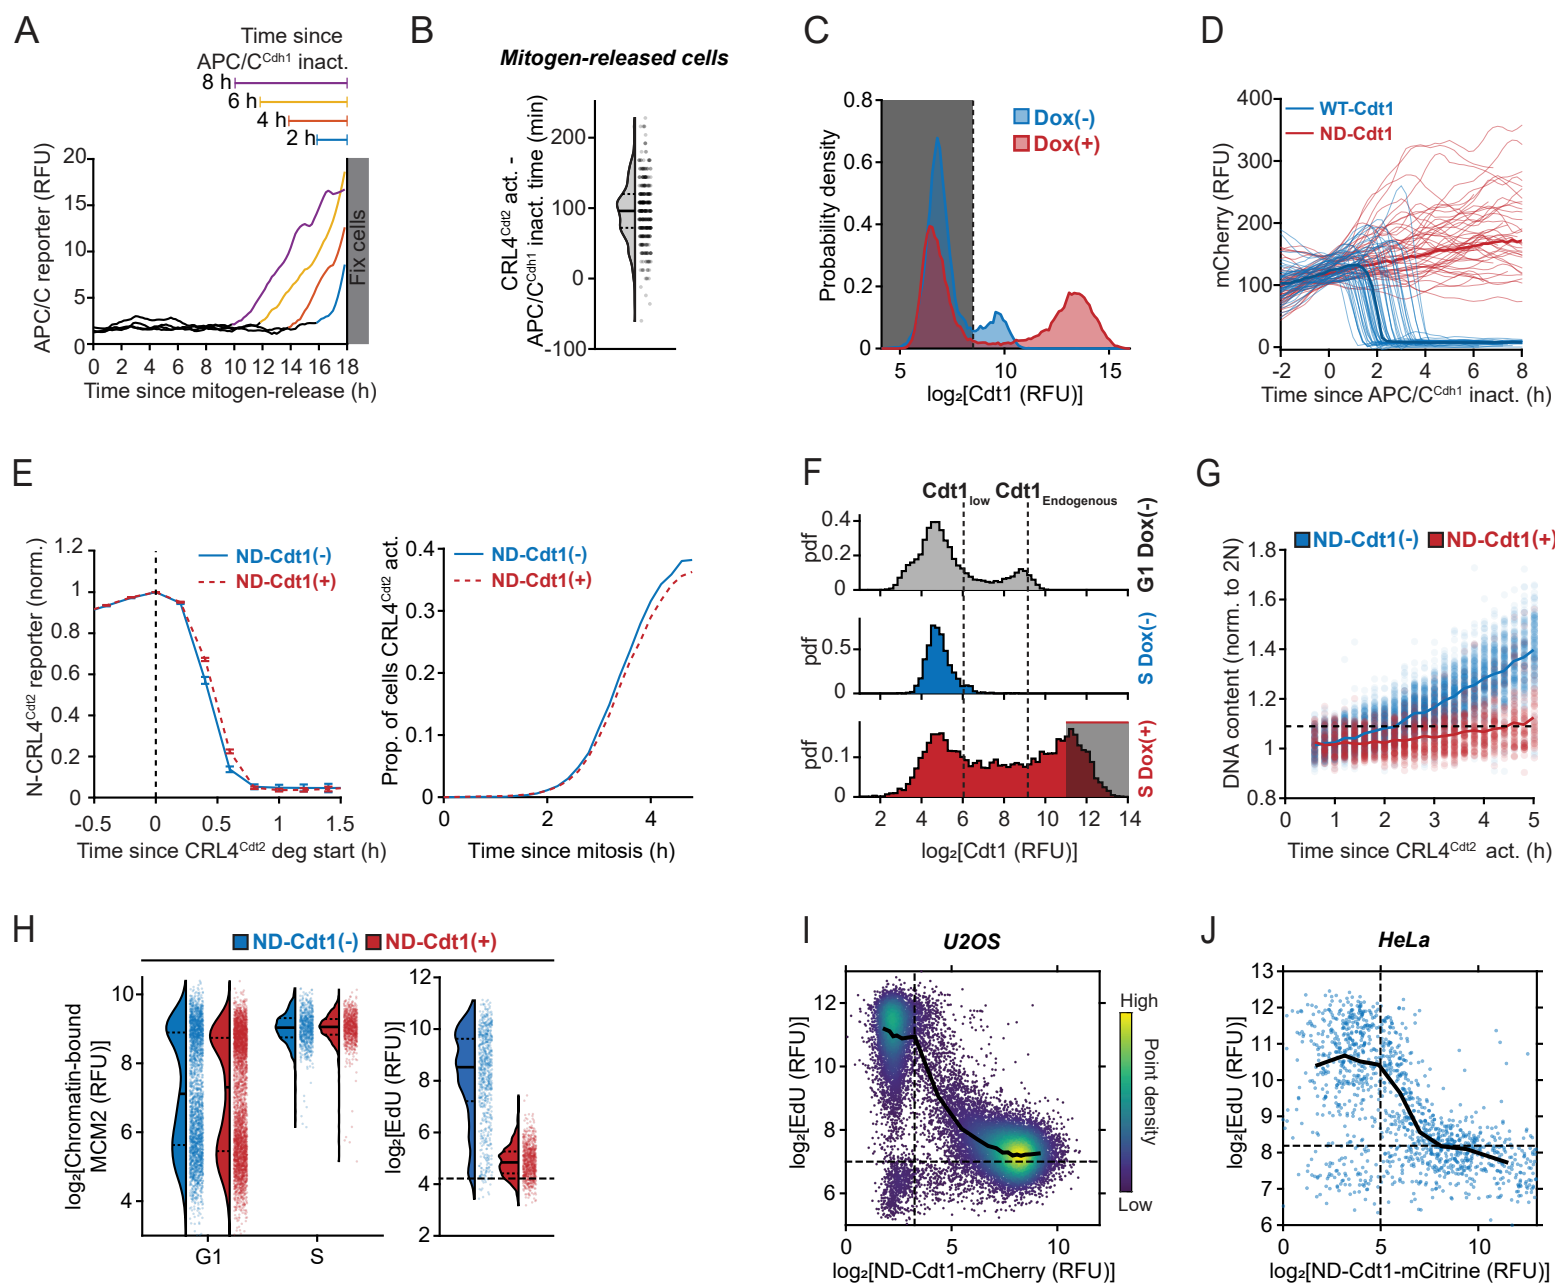

1409 **Figure S2. Related to Figure 2**

1410 **(A)** Example traces of cells from Figure 2B that inactivated APC/C<sup>Cdh1</sup> 2, 4, 6 and 8 h prior to  
1411 fixation.

1412 **(B)** Quantification of time between APC/C<sup>Cdh1</sup> inactivation and CRL4<sup>Cdt2</sup> activation (N-  
1413 CRL4<sup>Cdt2</sup>) in mitogen-released cells (compare to cycling cells, Figure S1C). Dashed and solid  
1414 lines in violin plots are IQR and median, respectively. n = 400 cells, representative of 3  
1415 independent experiments. Analyzed from same experiments as Figure 2F.

1416 **(C)** Cells from same experiment as Figure 2B. Quantification of Cdt1 immunofluorescence (IF)  
1417 staining (detecting endogenous Cdt1 as well as Cdt1-mCherry). Mitogen-released cells not  
1418 expressing Cdt1-mCherry, compared to cells expressing Cdt1-mCherry (doxycycline (Dox)-  
1419 induced for 24 h). Cells pooled from 5 wells each condition (n ≥ 22,350 cells).

1420 **(D)** Quantification of overexpressed Cdt1-mCherry and ND-Cdt1-mCherry as cells enter S  
1421 phase. Cells induced with Cdt1 constructs with were mitogen-stimulated and live-imaged. n=185  
1422 (Cdt1) and 205 (ND-Cdt1) cells. Traces were aligned to APC/C<sup>Cdh1</sup> inactivation.

1423 **(E)** Quantification of N-CRL4<sup>Cdt2</sup> reporter degradation dynamics with and without ND-Cdt1  
1424 induction for 6 h during imaging (in experiment from Figure 2E). Cells were stained for Cdt1  
1425 and ND-Cdt1(+) cells were selected in Dox-treated cells. Left: Mean N-CRL4<sup>Cdt2</sup> reporter  
1426 intensity following degradation start. Error bars are mean ± 2×SEM (ND-Cdt1(-): n = 547 cells,  
1427 ND-Cdt1(+): n = 1,644 cells). Right: Proportion of cells entering S phase (N-CRL4<sup>Cdt2</sup> reporter  
1428 degraded) over time following mitosis. ND-Cdt1(-): n = 7,637 cells, ND-Cdt1(+): n = 8,880  
1429 cells.

1430 **(F)** Estimation of ND-Cdt1 expression relative to normal G1 expression levels of Cdt1 measured  
1431 by IF in mitogen-released cells for Figures 2F, 3D and 3E. Top: Cdt1 in G1 cells without Dox (n  
1432 = 15,544). Typical endogenous Cdt1 levels at the end of G1 (Cdt1<sub>Endogenous</sub>) was estimated as the  
1433 median value of cells above the mode of Cdt1 expression in Cdt1 positive cells. Middle: Cdt1  
1434 intensity in S phase cells (0.5-1 h after CRL4<sup>Cdt2</sup> activation) without Dox (n = 250), representing  
1435 fully degraded Cdt1 levels (Cdt1<sub>low</sub>). Bottom: S phase cells induced with Dox (n = 2,417 cells) in  
1436 S phase. Shaded bar is gate used for ND-Cdt1(+) cells for Figures 2F.

1437 **(G)** Same cells as in Figure 2F examining DNA content measured by Hoechst stain. Values  
1438 normalized by 2N DNA peak. Line is median value at each time point. ND-Cdt1(-): n = 5,500  
1439 cells, ND-Cdt1(+): n = 2,000 cells.

1440 **(H)** RT-QIBC of chromatin-bound MCM2 levels (corresponding to licensed origins). ND-Cdt1-  
1441 mCherry was expressed in mitogen-released cells and the APC/C reporter and ND-Cdt1-  
1442 mCherry were imaged for 18 h. G1 cells (no APC/C<sup>Cdh1</sup> inactivation) and S phase cells (1-2 h  
1443 post APC/C<sup>Cdh1</sup> inactivation) were identified. Dashed and solid lines in violin plots are IQR and  
1444 median, respectively. n = 3,418 cells were randomly chosen for each condition shown.  
1445 Representative of 2 independent experiments.

1446 **(I)** QIBC of U2OS cells with ND-Cdt1-mCherry induced by Dox for 6 h. Cells were fixed and  
1447 Geminin immunofluorescence and EdU incorporation were performed. Early S phase cells were

1448 identified as having 2N DNA and positive for Geminin and EdU incorporation, and plotted as a  
1449 function of ND-Cdt1-mCherry levels. Thresholds were based on G1 EdU signal in cells not  
1450 induced with Dox. Black line represents median EdU value in bins of ND-Cdt1 levels. n =  
1451 19,866 pooled from 8 wells.

1452 **(J)** ND-Cdt1-mCitrine was transiently transfected into HeLa cells expressing the APC/C  
1453 reporter. RT-QIBC was performed after live-imaging both ND-Cdt1-mCitrine and APC/C  
1454 reporter levels for 15 h. EdU incorporation in early S phase cells (2N DNA, APC/C reporter  
1455 positive) was measured and plotted according to their ND-Cdt1-mCitrine levels. n = 1,269 cells,  
1456 pooled from 3 wells.

# Figure S3

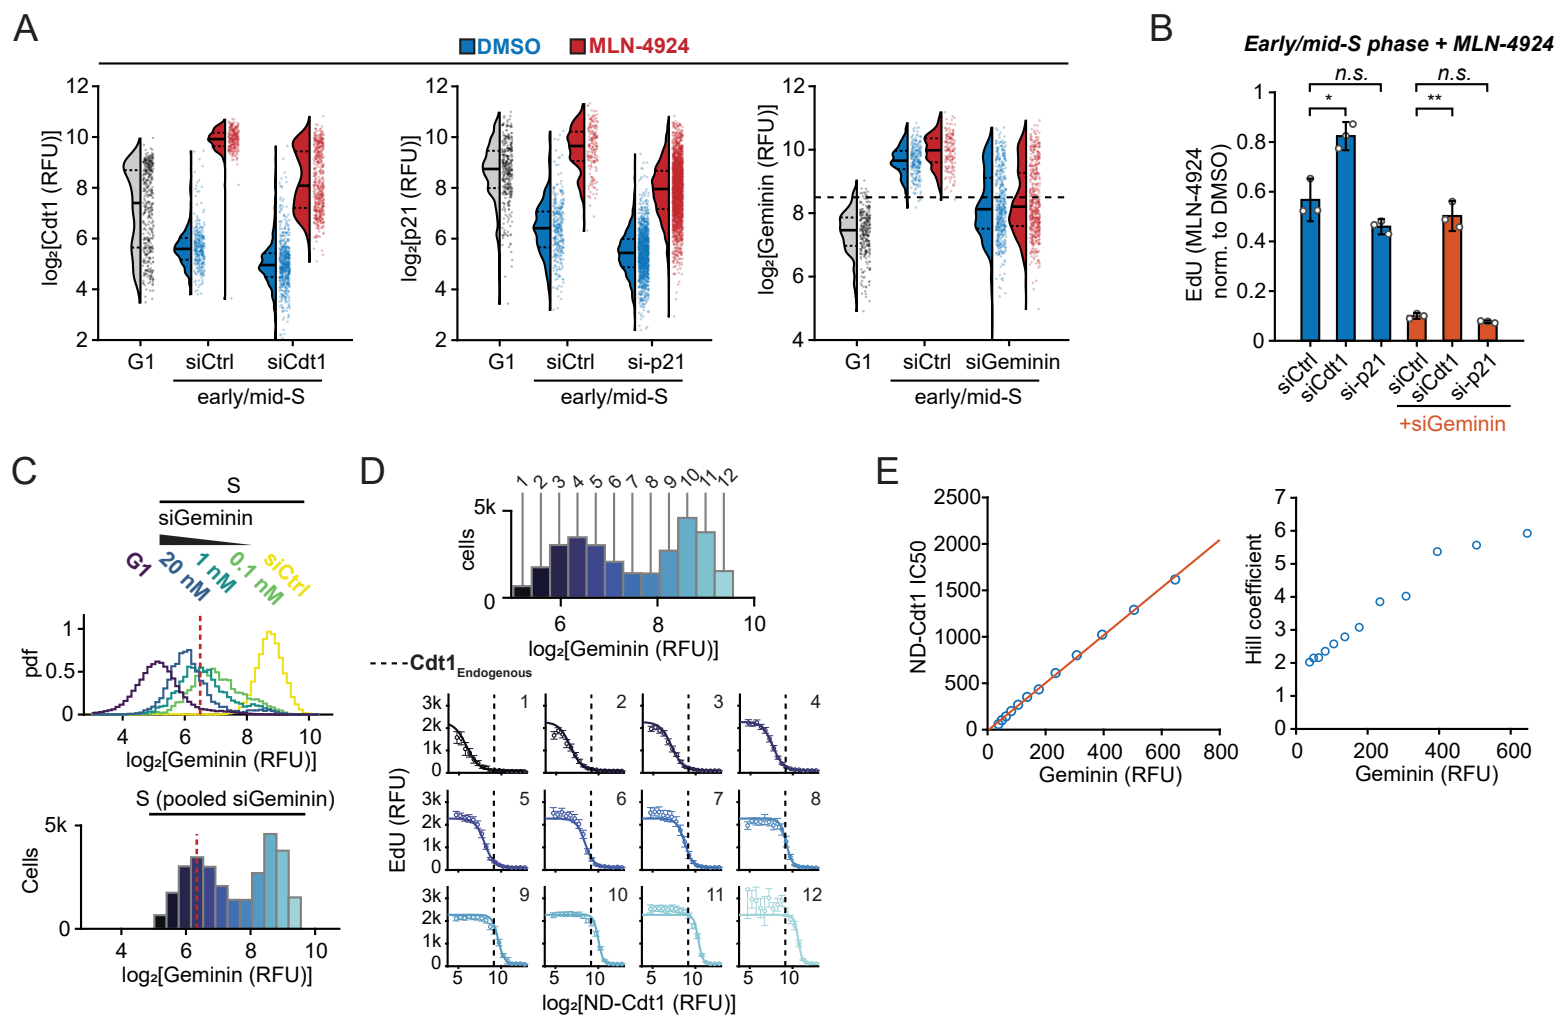

1457 **Figure S3. Related to Figure 3**

1458 **(A,B)** Cells expressing APC/C reporter and Cyclin E/A-CDK reporter (see Methods and Figure  
1459 S5A) were serum-starved and treated with siRNA. Cells were then mitogen-released and fixed  
1460 after 18 h. MLN-4924 was added 4 h prior to fixation. QIBC was performed to quantify the  
1461 levels of the fluorescent reporters, immunofluorescence and EdU. Gating for early/mid-S phase  
1462 cells is based on APC/C reporter intensity in 2N-3N cells with high Cyclin E/A-CDK activity ( $\geq$   
1463 0.8). Data pooled from 3 wells.

1464 **(A)** Validation of changes in protein levels with MLN-4924 and siRNA knockdowns. G1 cells  
1465 were chosen based on being negative for APC/C reporter and EdU incorporation, and  
1466 intermediate Cyclin E/A-CDK activity (0.5 - 0.8). Dashed and solid lines in violin plots are IQR  
1467 and median, respectively.  $n \geq 174$  cells for all conditions. G1 cells were treated with control  
1468 siRNA to identify normal G1 levels. For right panel, dashed line is threshold below which cells  
1469 with siGeminin were considered fully knocked down in Figure S3B.

1470 **(B)** Impact of siRNA knockdown on EdU incorporation in the presence of MLN-4924 in  
1471 early/mid-S phase. Points are median values of cells in different wells and bars are mean  $\pm$   
1472  $2 \times$ SEM of the medians.  $n \geq 57$  cells per well. For siGeminin conditions, cells with low Geminin  
1473 were selected. Two-sample *t*-test: siCtrl – siCdt1 (\*  $p$ -value =  $3.7 \times 10^{-2}$ ), siCtrl – si-p21 (n.s.  $p$ -  
1474 value =  $8.6 \times 10^{-2}$ ), siCtrl/siGeminin – siCdt1/siGeminin (\*\*  $p$ -value =  $4.5 \times 10^{-3}$ ),  
1475 siCtrl/siGeminin – si-p21/ siGeminin (n.s.  $p$ -value =  $8.0 \times 10^{-2}$ ).

1476 **(C)** Top: A range of Geminin levels in cells 2-3 h after S phase entry (N-CRL4<sup>Cdt2</sup> reporter) were  
1477 produced by titrating siGeminin ( $n \geq 4,572$  cells for all conditions) for experiments in Figures 3E  
1478 and 3F. Dashed line is threshold for low Geminin levels, determined from G1 cell Geminin  
1479 levels. Representative of 3 independent experiments. Bottom: Pooled S phase cells from all  
1480 siGeminin conditions to generate a range of Geminin expression.

1481 **(D)** Top: Cells from Figure S3C for all siRNA conditions were pooled together and separated  
1482 into 12 bins for analysis of the impact of Geminin on EdU incorporation. ( $n = 29,350$  total cells).  
1483 Individual dose-response fits from Figure 3E, same experiment as in Figure 2F. Dashed line  
1484 represents endogenous Cdt1 levels, determined from Figure S2F. Points and error bars are mean  
1485  $\pm 2 \times$ SEM for bins of ND-Cdt1 expression for given Geminin level (bins  $\geq 6$  cells, median bin  
1486 count 127).

1487 **(E)** ND-Cdt1 IC<sub>50</sub>(left) and Hill coefficient (right) for fit dose-response as a function of Geminin  
1488 expression levels. Left: Line is linear regression fit ( $R^2 = .999$ ).

# Figure S4

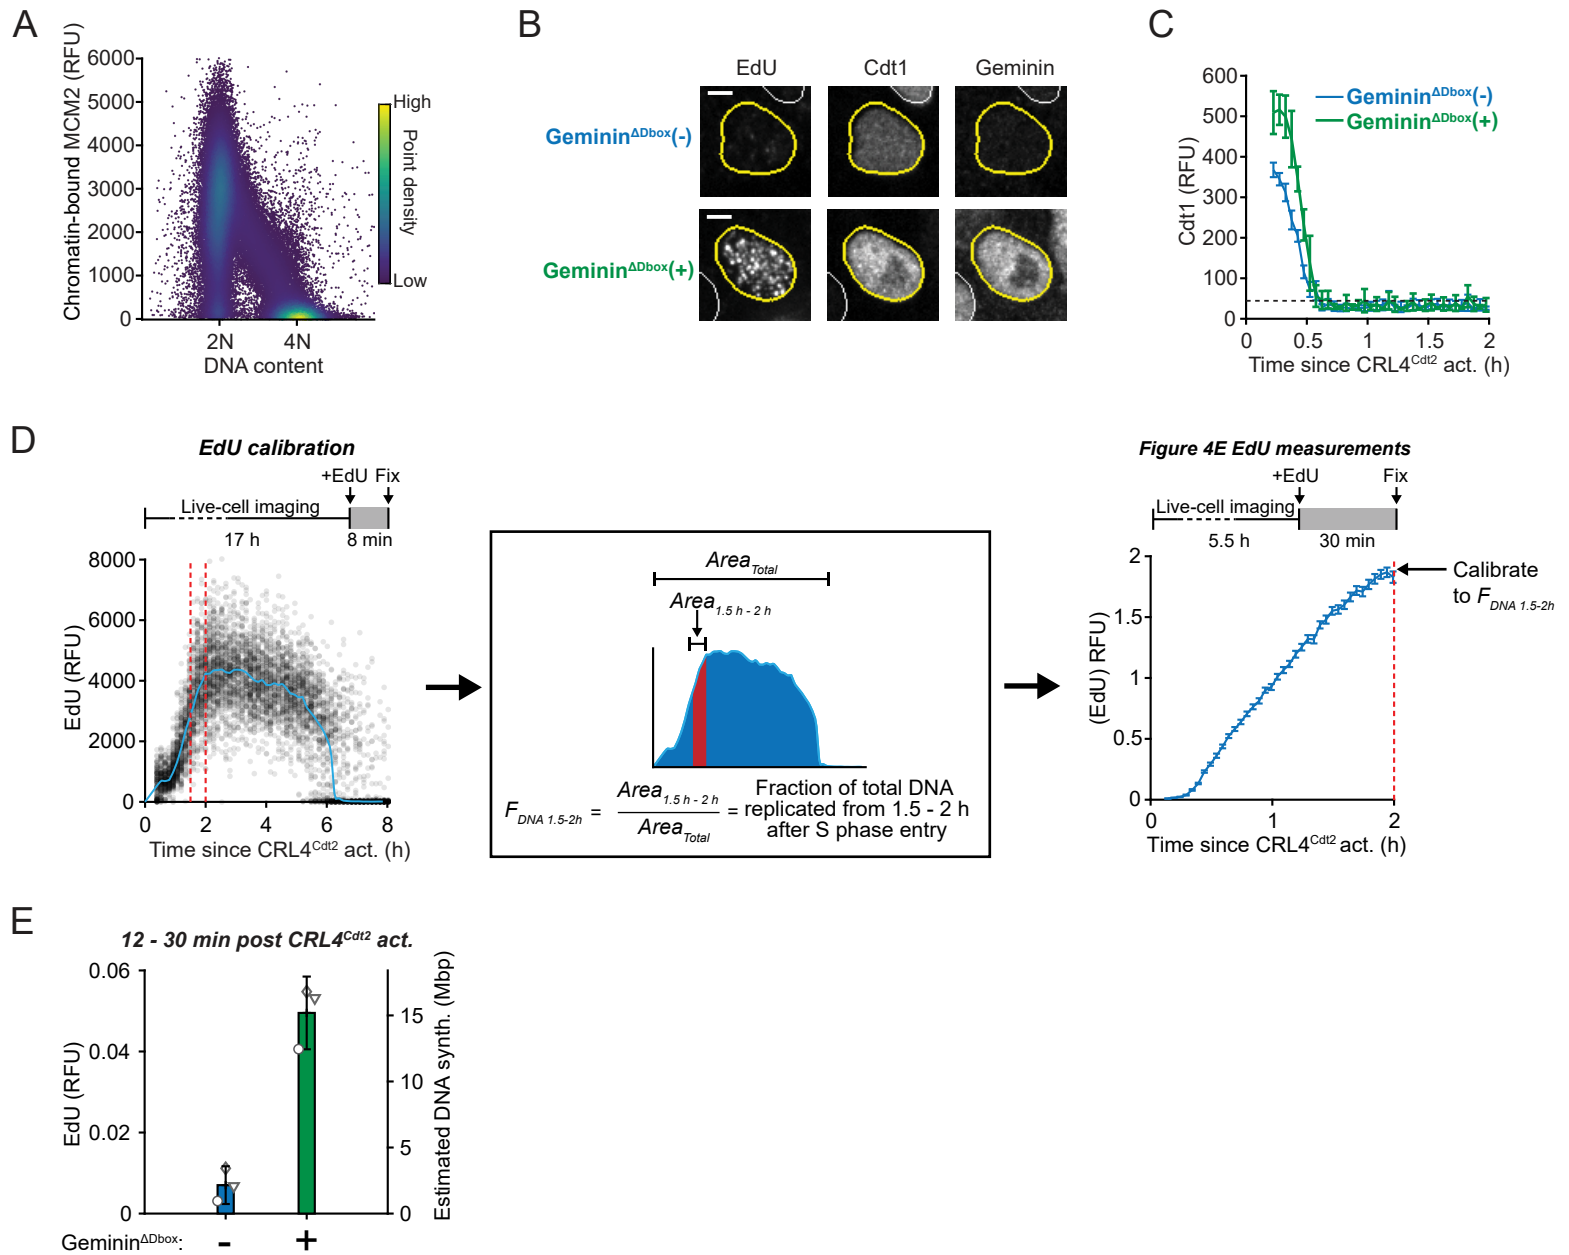

1489 **Figure S4. Related to Figure 4**

1490 **(A)** QIBC of chromatin-bound MCM2 (n = 96,297 cells) in cycling cells as a function of DNA  
1491 content. 2N DNA content was estimated from G1 DNA intensity. RT-QIBC analysis from Figure  
1492 4D was performed simultaneously with this experiment.

1493 **(B)** Same example cells as shown in Figure 4E, co-stained for EdU incorporation, Cdt1 and  
1494 Geminin (detecting both endogenous Geminin and Geminin<sup>ΔDbox</sup>). Scale bar = 5 μm. Note, Cdt1  
1495 levels are likely increased in response to Geminin<sup>ΔDbox</sup> due to co-stabilization. However, Cdt1 is  
1496 inactivated by Geminin, and Cdt1 is still degraded over the same 30 min period (Figure S4C).

1497 **(C)** RT-QIBC of endogenous Cdt1 following C-CRL4<sup>Cdt2</sup> activation in cells with Geminin<sup>ΔDbox</sup>  
1498 overexpressed. Same cells as in Figure 4E and S4B. Cells that had doxycycline (Dox) added ≤1 h  
1499 prior to mitosis were analyzed. Geminin<sup>ΔDbox</sup> does not impact the time it takes to degrade Cdt1.  
1500 Error bars and line are mean ± 2×SEM in bins of cells (Geminin<sup>ΔDbox</sup>(-): n = 3,436,  
1501 Geminin<sup>ΔDbox</sup>(+): 2,302 cells total, n ≥ 32 cells per bin). Representative for 3 independent  
1502 experiments.

1503 **(D,E)** Calibration of EdU incorporation to absolute DNA synthesis from Figure 4E using RT-  
1504 QIBC (C-CRL4<sup>Cdt2</sup> reporter). In general, the relationship between EdU incorporation intensity  
1505 and absolute DNA synthesis (in base pairs) can be inferred by integrating EdU incorporation  
1506 measurements made throughout S phase, which estimates the signal which would be observed if  
1507 EdU was incorporated in all of S phase. From this analysis, the fraction of total DNA synthesis  
1508 during a given period (in this experiment, a period 1.5-2 h after S phase entry was chosen as a  
1509 calibration point. Denoted as  $F_{DNA\ 1.5-2h}$ ) can be estimated by taking the ratio of the area from 1.5-  
1510 2 h after S phase entry ( $Area_{1.5-2h}$ ) to the total area ( $Area_{Total}$ ). In the experiment from Figure 4E,  
1511 a 30 min EdU pulse was used, and thus the EdU intensity in cells 2 h after S phase entry in cells  
1512 without Dox added would be equivalent to  $F_{DNA\ 1.5-2h}$ .

1513 **(D)** Left:  $F_{DNA\ 1.5-2h}$  was estimated in cells by RT-QIBC of an 8 min EdU pulse at the end of  
1514 imaging, with 8 min time interval for live-cell imaging. The median EdU incorporation for each  
1515 timepoint was calculated and used to determine area under the curve (n = 13,626 cells). Middle:  
1516 Calculation of area under curve. Left: RT-QIBC measurements of EdU incorporation from a 30  
1517 min EdU pulse at the end of imaging. Line and error bars are mean ± 2×SEM in cells within  
1518 bins. Data pooled from 3 independent experiments (n = 33,208 cells).

1519 **(E)** The EdU signal in each condition from Figure 4E was calibrated based on Figure S4D to find  
1520 the equivalent fraction of total DNA synthesis. Multiplying this by  $6 \times 10^9$  base pairs  
1521 (approximate human diploid DNA) gives the equivalent amount of DNA synthesis in base pairs.  
1522 For each of 3 independent experiments, the median of cells were taken (n ≥ 31 cells per replicate  
1523 per condition, Geminin<sup>ΔDbox</sup>(-) 120 cells total, Geminin<sup>ΔDbox</sup>(+) 213 cells total). Error bars are mean  
1524 ± 2×SEM.



## Figure S5

### A Cyclin E/A-CDK activity reporter

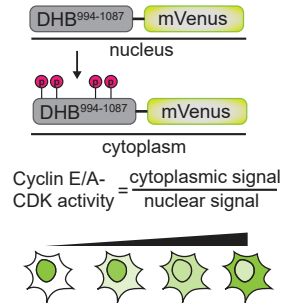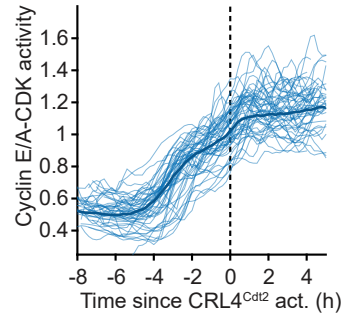

### B

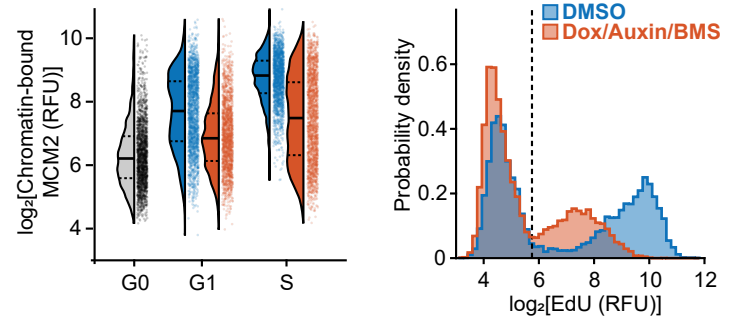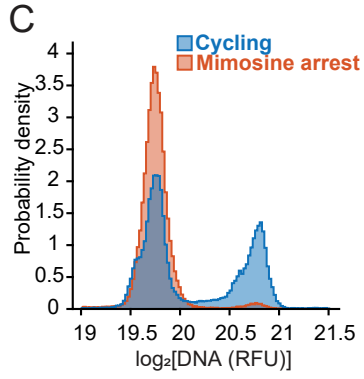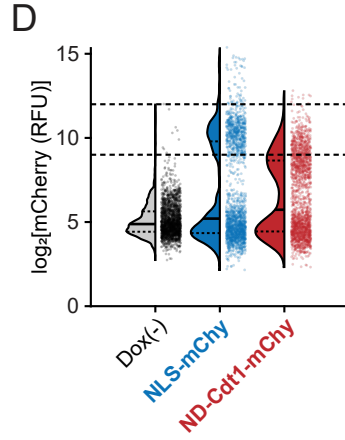

1525 **Figure S5. Related to Figure 5**

1526 **(A)** Cyclin E/A-CDK activity reporter is initially nuclear localized in G0 and early G1 and  
1527 gradually translocates to the cytoplasm in response to Cyclin E/A-CDK activity. 50 sample  
1528 traces in cells released from serum starvation aligned to N-CRL4<sup>Cdt2</sup> reporter degradation. Thick  
1529 line is median trace of 1,269 cells.

1530 **(B)** RPE-1 *p53*<sup>-/-</sup> *CDC6*<sup>d/d</sup> cells were serum-starved in G0. Cells were then mitogen-released in  
1531 the presence of doxycycline (Dox), Auxin and BMS-650032 (BMS) to degrade Cdc6 as cells re-  
1532 enter the cell cycle and inhibit origin licensing, or with vehicle (DMSO) to permit origin  
1533 licensing. Left: Cells were fixed 12 h after serum release and QIBC was performed on  
1534 chromatin-bound MCM2. G0 cells are unreleased cells, and G1 and early S phase cells were  
1535 chosen on the basis of EdU incorporation. n = 2,000 cells for all conditions. Pooled from 2 wells  
1536 in each condition. Right: Cells were fixed 15 h after serum release and QIBC was performed on  
1537 EdU incorporation. 2N DNA (G1/early S phase cells) were plotted, and dashed line is threshold  
1538 for EdU incorporation, calculated from G0 cells. n = 12,380 cells (DMSO), 13,543 cells  
1539 (Dox/Auxin/BMS). Pooled from 2 wells.

1540 **(C)** QIBC of DNA content in mimosine arrested cells using protocol in Figure 5F, compared to  
1541 cycling cells. N = 52,433 cells (mimosine arrested) and 61,472 cells (cycling). Representative of  
1542 2 independent experiments.

1543 **(D)** QIBC of mCherry fluorescence in cells induced in Figure 5F. n = 2,000 cells per condition.  
1544 Cells with mCherry fluorescence within lines were chosen for analysis in Figure 5G.

# Figure S6

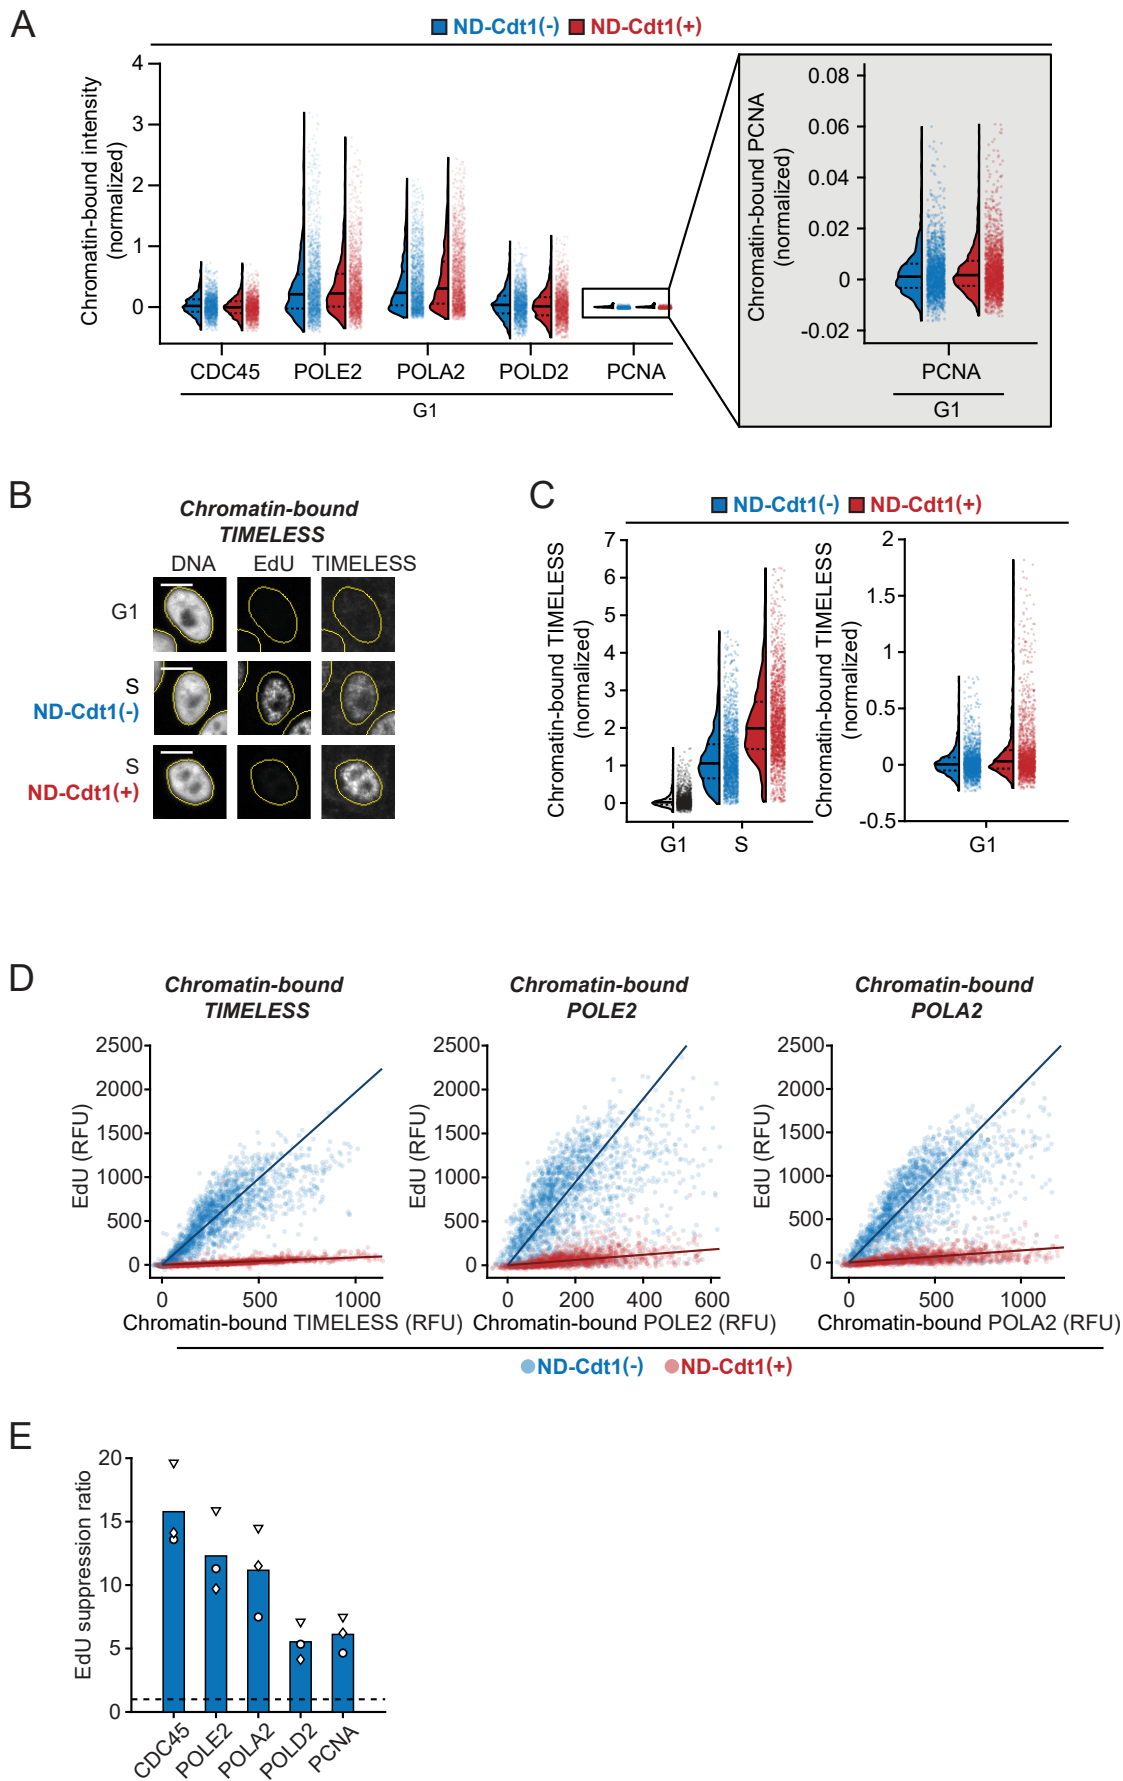

1545 **Figure S6. Related to Figure 6**

1546 **(A-E)** RT-QIBC of chromatin-bound replisome components in cells expressing ND-Cdt1-  
1547 mCherry. Mitogen-released cells with the APC/C reporter were induced with doxycycline and  
1548 released for 18 h. G1 cells had active APC/C<sup>Cdh1</sup> without chromatin-bound PCNA. Cells which  
1549 expressed ND-Cdt1-mCherry during live imaging were selected for ND-Cdt1(+). Representative  
1550 of 3 independent experiments.

1551 **(A)** Comparison of chromatin-bound replisome components in G1 with ND-Cdt1, in same  
1552 experiment as Figure 6B. G1 mode intensities from ND-Cdt1(-) were subtracted off signals and  
1553 values were normalized to the ND-Cdt1(-) S phase condition from Figure 6B. Dashed and solid  
1554 lines in violin plots are IQR and median, respectively. N = 2,000 cells per condition.  
1555 Representative of 3 individual experiments.

1556 **(B)** Representative cells of chromatin-bound TIMELESS. Scale bar = 10  $\mu$ m.

1557 **(C)** Comparison of chromatin-bound TIMELESS in S phase (left) and G1 phase (right), analyzed  
1558 in same way as Figure 6B and Figure S6A. n = 2,000 cells, pooled from 3 wells for ND-Cdt1(-),  
1559 or 7 wells for ND-Cdt1(+).

1560 **(D)** Analysis of EdU incorporation as a function of chromatin-bound protein levels for  
1561 TIMELESS, POLE2, POLA2 in S phase. G1 mode intensities were subtracted off EdU and  
1562 chromatin-bound intensity. Line is fit line of linear regression (n = 2000 cells). Representative of  
1563 3 independent experiments. Other stains in Figure 6C. TIMELESS staining was done in separate  
1564 experiment as other stains from this figure and Figure 6C. Cells were pooled from 3 wells for  
1565 ND-Cdt1(-), or 7 wells for ND-Cdt1(+), from a single experiment.

1566 **(E)** Summary of slopes from fit lines from Figure 6C and S6D. EdU suppression ratio is defined  
1567 as the ratio of the fit line in the control condition to the ND-Cdt1 condition (>1 indicates there is  
1568 lower EdU incorporation for a given amount of chromatin-bound protein). Bar is mean of 3  
1569 independent experiments.

# Figure S7

A

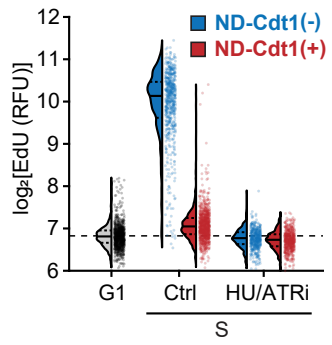

1570 ***Figure S7. Related to Figure 7***

1571 **(A)** RT-QIBC of EdU incorporation in cells treated and analyzed as in Figure 7B (co-stained  
1572 together with CDC45).  $n \geq 503$  cells for all conditions. Representative of 3 independent  
1573 experiments.

1574 ***Table S1. Related to STAR Methods***

1575 Supplemental details on recombinant DNA used to generate cell lines in this study (and which  
1576 Figures each cell line was used in), as well as siRNA oligonucleotides used in this study.
